# Supplementary material
Source: publisher site journal article supplement (https://www.dovepress.com/article/491008)
Supplement: Supplementary file 1 [file get_supplementary_file.php]

**Additional file 1: PICO-scheme of our applied search-term**

| PICO-scheme             | Search term                                                                                                          | MeshTerm(s)                                    |
|-------------------------|----------------------------------------------------------------------------------------------------------------------|------------------------------------------------|
| P (Patient; Population) | Medical Students, Physicians; Medical education                                                                      | Students Medical; Education, medical; Medicine |
| I (Intervention)        | Factors during the course of study; Influencing factors; Determinants and variables for specialty choice; Curriculum | Curriculum                                     |
| C (Comparison; Control) |                                                                                                                      |                                                |
| O (Outcome)             | Specialty preferences; Medical specialization/specialties; Career choice                                             | Career choice                                  |

**Additional file 2:** List of all included studies in the systematic review

1. Abendroth J, Schnell U, Lichte T, Oemler M, Klement A. Motives of former interns in general practice for speciality-choice - results of a cross-sectional study among graduates 2007 to 2012. *GMS Z Med Ausbild.* 2014;31(1):Doc11. doi:[10.3205/zma000903](https://doi.org/10.3205/zma000903)
2. Admani S, Caufield M, Kim SS, Siegfried EC, Friedlander SF. Understanding the pediatric dermatology workforce shortage: mentoring matters. *J Pediatr.* 2014;164(2):372-375. doi:[10.1016/j.jpeds.2013.10.004](https://doi.org/10.1016/j.jpeds.2013.10.004)
3. Ahsin S, Saeed GN. Medical electives: Students perspective. *J Pak Med Assoc.* 2016;66(4):404-408.
4. Al Salehi A, Al Dughaisi T, Rizvi G, Gowri V. Obstetrics and Gynaecology as a Future Career for Medical Graduates in Oman: Factors that attract and discourage graduates. *Sultan Qaboos Univ Med J.* 2019;19(1):58-62. doi:[10.18295/squmj.2019.19.01.011](https://doi.org/10.18295/squmj.2019.19.01.011)
5. al-Asnag MA, Jan MMS. Influence of the clinical rotation on intern attitudes toward pediatrics. *Clin Pediatr (Phila).* 2002;41(7):509-514. doi:[10.1177/000992280204100708](https://doi.org/10.1177/000992280204100708)
6. Al-Jaeed A, Al-Rammahi Y, Mawash M, Al-Hadrawy HK, Al Ghazali BS. Exploring speciality preferences and the influencing factors among undergraduate medical students at University of Kufa, Iraq: A questionnaire-based cross-sectional survey. *J Pak Med Assoc.* 2021;71(4):1303-1308. doi:[10.47391/JPMA.1358](https://doi.org/10.47391/JPMA.1358)
7. Al-Mendalawi MD. Speciality preferences of Iraqi medical students. *Clin Teach.* 2010;7(3):175-179. doi:[10.1111/j.1743-498X.2010.00358.x](https://doi.org/10.1111/j.1743-498X.2010.00358.x)
8. Al-Nuaimi Y, McGrouther G, Bayat A. Modernising medical careers and factors influencing career choices of medical students. *Br J Hosp Med (Lond).* 2008;69(3):163-166. doi:[10.12968/hmed.2008.69.3.28754](https://doi.org/10.12968/hmed.2008.69.3.28754)
9. Alavi M, Ho T, Stisher C, et al. Factors That Influence Student Choice in Family Medicine A National Focus Group. *Fam Med.* 2019;51(2):143-148. doi:[10.22454/FamMed.2019.927833](https://doi.org/10.22454/FamMed.2019.927833)
10. Albert DV, Hoyle C, Yin H, McCoyd M, Lukas RV. Why neurology? Factors which influence career choice in neurology. *Neurol Res.* 2016;38(1):10-14. doi:[10.1080/01616412.2015.1120444](https://doi.org/10.1080/01616412.2015.1120444)
11. Alberti H, Randles HL, Harding A, McKinley RK. Exposure of undergraduates to authentic GP teaching and subsequent entry to GP training: a quantitative study of UK medical schools. *Br J Gen Pract.* 2017;67(657):e248-e252. doi:[10.3399/bjgp17X689881](https://doi.org/10.3399/bjgp17X689881)
12. Alkatout I, Günther V, Brügge S, et al. Involvement of medical students in a surgery congress: impact on learning motivation, decision-making for a career in surgery, and educational curriculum. *Wien Med Wochenschr.* 2021;171(7-8):182-193. doi:[10.1007/s10354-020-00802-w](https://doi.org/10.1007/s10354-020-00802-w)
13. Amalba A, Abantanga FA, Scherpbier AJJA, van Mook WNKA. Community-based education: The influence of role modeling on career choice and practice location. *Med Teach.* 2017;39(2):174-180. doi:[10.1080/0142159X.2016.1246711](https://doi.org/10.1080/0142159X.2016.1246711)
14. Ambrozy DM, Irby DM, Bowen JL, Burack JH, Carline JD, Stritter FT. Role models' perceptions of themselves and their influence on students' speciality choices. *Academic medicine : journal of the Association of American Medical Colleges.* 1997;72(12). doi:[10.1097/00001888-199712000-00028](https://doi.org/10.1097/00001888-199712000-00028)
15. Andlauer O, Guicherd W, Haffen E, et al. Factors influencing French medical students towards a career in psychiatry. *Psychiatr Danub.* 2012;24 Suppl 1:S185-190.
16. Appleton A, Singh S, Eady N, Buszewicz M. Why did you choose psychiatry? a qualitative study of psychiatry trainees investigating the impact of psychiatry teaching at medical school on career choice. *BMC Psychiatry.* 2017;17(1):276. doi:[10.1186/s12888-017-1445-5](https://doi.org/10.1186/s12888-017-1445-5)
17. Are C, Stoddard HA, Nelson KL, Huggett K, Carpenter L, Thompson JS. The influence of medical school on career choice: A longitudinal study of students' attitudes toward a career in general surgery. *Am J Surg.* 2018;216(6):1215-1222. doi:[10.1016/j.amjsurg.2018.10.036](https://doi.org/10.1016/j.amjsurg.2018.10.036)
18. Arleo EK, Bluth E, Francavilla M, Straus CM, Reddy S, Recht M. Surveying Fourth-Year Medical Students Regarding the Choice of Diagnostic Radiology as a Specialty. *J Am Coll Radiol.* 2016;13(2):188-195. doi:[10.1016/j.jacr.2015.08.005](https://doi.org/10.1016/j.jacr.2015.08.005)
19. Asaad M, Zayegh O, Badawi J, et al. Gender differences in specialty preference among medical Students at Aleppo University: a cross-sectional study. *BMC Med Educ.* 2020;20(1):184. doi:[10.1186/s12909-020-02081-w](https://doi.org/10.1186/s12909-020-02081-w)
20. Atalabi MO, Adedokun BO, Agunloye A. Sociodemographic factors and clerkship experience influence Ibadan medical students' preference for radiology specialty. *J Am Coll Radiol.* 2013;10(6):470-474. doi:[10.1016/j.jacr.2013.01.014](https://doi.org/10.1016/j.jacr.2013.01.014)
21. Azizzadeh A, McCollum CH, Miller CC, Holliday KM, Shilstone HC, Lucci A. Factors influencing career choice among medical students interested in surgery. *Curr Surg.* 2003;60(2):210-213. doi:[10.1016/S0149-7944\(02\)00679-7](https://doi.org/10.1016/S0149-7944(02)00679-7)
22. Balogun JA, Adebayo AM. Perception (of) and Willingness to Choose a Neurosurgery Career Among Final-Year Medical Students in Ibadan, Nigeria. *World Neurosurg.* 2019;126:998-1004. doi:[10.1016/j.wneu.2019.03.020](https://doi.org/10.1016/j.wneu.2019.03.020)
23. Barat A, Goldacre MJ, Lambert TW. Junior doctors' early career choices do not predict career destination in neurology: 40 years of surveys of UK medical graduates. *BMC Med Educ.* 2019;19(1):257. doi:[10.1186/s12909-019-1650-7](https://doi.org/10.1186/s12909-019-1650-7)

24. Barber S, Brettell R, Perera-Salazar R, Greenhalgh T, Harrington R. UK medical students' attitudes towards their future careers and general practice: a cross-sectional survey and qualitative analysis of an Oxford cohort. *BMC Med Educ.* 2018;18(1):160. doi:[10.1186/s12909-018-1197-z](https://doi.org/10.1186/s12909-018-1197-z)
25. Barron R, Frank E, Gitlow S. Evaluation of an experiential curriculum for addiction education among medical students. *J Addict Med.* 2012;6(2):131-136. doi:[c](https://doi.org/c)
26. Bauer F, Rommel N, Koerdt S, Fichter A, Wolff KD, Kesting MR. Can a one-day practical lesson in surgical skills encourage medical students to consider a surgical career? *Br J Oral Maxillofac Surg.* 2016;54(4):405-409. doi:[10.1016/j.bjoms.2015.10.002](https://doi.org/10.1016/j.bjoms.2015.10.002)
27. Bédard MJ, Berthiaume S, Beaulieu MD, Leclerc C. Factors influencing the decision to practise obstetrics among Québec medical students: a survey. *J Obstet Gynaecol Can.* 2006;28(12):1075-1082. doi:[10.1016/s1701-2163\(16\)32323-4](https://doi.org/10.1016/s1701-2163(16)32323-4)
28. Beier JP, Horch RE, Boos AM, Taeger CD, Breuer G, Arkudas A. Establishment and Evaluation of a Microsurgery Course for Medical Students. *Handchir Mikrochir Plast Chir.* 2015;47(6):400-407. doi:[10.1055/s-0041-108196](https://doi.org/10.1055/s-0041-108196)
29. Berger AP, Giacalone JC, Barlow P, Kapadia MR, Keith JN. Choosing surgery as a career: Early results of a longitudinal study of medical students. *Surgery.* 2017;161(6):1683-1689. doi:[10.1016/j.surg.2016.12.016](https://doi.org/10.1016/j.surg.2016.12.016)
30. Bhat S, D'souza L, Fernandez J. Factors Influencing the Career Choices of Medical Graduates. *Journal of Clinical and Diagnostic Research.* 2012;6:61-64.
31. Bhutta M, Mandavia R, Syed I, et al. A survey of how and why medical students and junior doctors choose a career in ENT surgery. *J Laryngol Otol.* 2016;130(11):1054-1058. doi:[10.1017/S0022215116009105](https://doi.org/10.1017/S0022215116009105)
32. Bien A, Ravens-Taeuber G, Stefanescu MC, Gerlach FM, Güthlin C. What influence do courses at medical school and personal experience have on interest in practicing family medicine? – Results of a student survey in Hessa. *GMS J Med Educ.* 2019;36(1). doi:[10.3205/zma001217](https://doi.org/10.3205/zma001217)
33. Blatt CE, Klugman S, Blitzer MG. The training of future clinical geneticists: Evaluation and reflection on the ACMG Foundation for Genetic and Genomic Medicine Summer Genetics Scholars Program. *Genet Med.* 2022;24(2):488-491. doi:[10.1016/j.gim.2021.09.013](https://doi.org/10.1016/j.gim.2021.09.013)
34. Blue AV, Donnelly MB, Harrell-Parr P, Murphy-Spencer A, Rubeck RF, Jarecky RK. Developing generalists for Kentucky. *J Ky Med Assoc.* 1996;94(10):439-445.
35. Bobo WV, Nevin R, Greene E, Lacy TJ. The effect of psychiatric third-year rotation setting on academic performance, student attitudes, and specialty choice. *Acad Psychiatry.* 2009;33(2):105-111. doi:[10.1176/appi.ap.33.2.105](https://doi.org/10.1176/appi.ap.33.2.105)
36. Bolger JC, MacNamara F, Hill AD. An analysis of medical students' attitude to surgical careers and pursuing intercalated research degrees. *Ir J Med Sci.* 2016;185(1):177-182. doi:[10.1007/s11845-015-1264-y](https://doi.org/10.1007/s11845-015-1264-y)
37. Bonura EM, Lee ES, Ramsey K, Armstrong WS. Factors Influencing Internal Medicine Resident Choice of Infectious Diseases or Other Specialties: A National Cross-sectional Study. *Clin Infect Dis.* 2016;63(2):155-163. doi:[10.1093/cid/ciw263](https://doi.org/10.1093/cid/ciw263)
38. Borges NJ, Manuel RS, Duffy RD, Fedyna D, Jones BJ. Influences on specialty choice for students entering person-oriented and technique-oriented specialties. *Med Teach.* 2009;31(12):1086-1088. doi:[10.3109/01421590903183787](https://doi.org/10.3109/01421590903183787)
39. Boyd JS, Clyne B, Reinert SE, Zink BJ. Emergency medicine career choice: a profile of factors and influences from the Association of American Medical Colleges (AAMC) graduation questionnaires. *Acad Emerg Med.* 2009;16(6):544-549. doi:[10.1111/j.1553-2712.2009.00385.x](https://doi.org/10.1111/j.1553-2712.2009.00385.x)
40. Boyle V, Shulruf B, Poole P. Influence of gender and other factors on medical student specialty interest. *N Z Med J.* 2014;127(1402):78-87.
41. Briggs S, Atkins R, Playfer J, Corrado OJ. Why do doctors choose a career in geriatric medicine? *Clin Med (Lond).* 2006;6(5):469-472. doi:[10.7861/clinmedicine.6-5-469](https://doi.org/10.7861/clinmedicine.6-5-469)
42. Brooks EG, Paus AM, Corliss RF, Ranheim EA. Enhancing preclinical year pathology exposure: the Angevine approach. *Hum Pathol.* 2016;53:58-62. doi:[10.1016/j.humpath.2016.02.006](https://doi.org/10.1016/j.humpath.2016.02.006)
43. Brown M, Barnes J, Silver K, Williams N, Newton PM. The Educational Impact of Exposure to Clinical Psychiatry Early in an Undergraduate Medical Curriculum. *Acad Psychiatry.* 2016;40(2):274-281. doi:[10.1007/s40596-015-0358-1](https://doi.org/10.1007/s40596-015-0358-1)
44. Buddeberg-Fischer B, Illés C, Klaghofer R. Career wishes and career worries of medical students--results of focus group interviews. *Gesundheitswesen.* 2002;64(6):353-363. doi:[10.1055/s-2002-32179](https://doi.org/10.1055/s-2002-32179)
45. Burack JH, Irby DM, Carline JD, Ambrozy DM, Ellsbury KE, Stritter FT. A study of medical students' specialty-choice pathways: trying on possible selves. *Acad Med.* 1997;72(6):534-541. doi:[10.1097/00001888-199706000-00021](https://doi.org/10.1097/00001888-199706000-00021)
46. Calligaro KD, Dougherty MJ. Choice of vascular surgery as a specialty: what is important? *Semin Vasc Surg.* 2006;19(4):180-186. doi:[10.1053/j.semvascsurg.2006.08.004](https://doi.org/10.1053/j.semvascsurg.2006.08.004)
47. Campos-Outcalt D, Senf J, Kutob R. A comparison of primary care graduates from schools with increasing production of family physicians to those from schools with decreasing production. *Fam Med.* 2004;36(4):260-264.
48. Carmichael H, Coleman JR, Samuels JM, et al. "Bedside Anatomy": A Tool to Contextualize Learning and Introduce Surgical Careers. *J Surg Res.* 2020;249:1-7. doi:[10.1016/j.jss.2019.12.015](https://doi.org/10.1016/j.jss.2019.12.015)

49. Celenza A, Bharath J, Scop J. Improving the attractiveness of an emergency medicine career to medical students: An exploratory study. *Emerg Med Australas*. 2012;24(6):625-633. doi:[10.1111/j.1742-6723.2012.01607.x](https://doi.org/10.1111/j.1742-6723.2012.01607.x)
50. Chan DM, Wong R, Runnels S, Muhizi E, McClain CD. Factors Influencing the Choice of Anesthesia as a Career by Undergraduates of the University of Rwanda. *Anesth Analg*. 2016;123(2):481-487. doi:[10.1213/ANE.0000000000001433](https://doi.org/10.1213/ANE.0000000000001433)
51. Chan SC, Ganeson JV, Ong JT, Sugathan S. Perceptions of Malaysian medical students from different academic years on primary care: a qualitative research. *Fam Med Community Health*. 2020;8(1):e000188. doi:[10.1136/fmch-2019-000188](https://doi.org/10.1136/fmch-2019-000188)
52. Chang BA, Karin E, Davidson ZA, Ripp J, Soriano RP. Impact of a Short-Term Domestic Service-Learning Program on Medical Student Education. *Ann Glob Health*. 2019;85(1):92. doi:[10.5334/aogh.2465](https://doi.org/10.5334/aogh.2465)
53. Chang PY, Hung CY, Wang KI, Huang YH, Chang KJ. Factors influencing medical students' choice of specialty. *J Formos Med Assoc*. 2006;105(6):489-496. doi:[10.1016/s0929-6646\(09\)60189-3](https://doi.org/10.1016/s0929-6646(09)60189-3)
54. Chapman JJ, Weiss SJ, Haynes ML, Ernst AA. Impact of EMS education on emergency medicine ability and career choices of medical students. *Prehosp Emerg Care*. 1999;3(2):163-166. doi:[10.1080/10903129908958926](https://doi.org/10.1080/10903129908958926)
55. Chaudhuri E, Mason NC, Newbery N, Goddard AF. Career choices of junior doctors: is the physician an endangered species? *Clin Med (Lond)*. 2013;13(4):330-335. doi:[10.7861/clinmedicine.13-4-330](https://doi.org/10.7861/clinmedicine.13-4-330)
56. Cheng E, Hirsh D, Gauferberg E, Griswold T, Wesley Boyd J. Findings from the Harvard Medical School Cambridge Integrated Clerkship, a Year-Long Longitudinal Psychiatry Experience. *Acad Psychiatry*. 2018;42(3):357-361. doi:[10.1007/s40596-017-0742-0](https://doi.org/10.1007/s40596-017-0742-0)
57. Cherry-Bukowiec JR, Machado-Aranda D, To K, Englesbe M, Ryszawa S, Napolitano LM. Improvement in acute care surgery medical student education and clerkships: use of feedback and loop closure. *J Surg Res*. 2015;199(1):15-22. doi:[10.1016/j.jss.2015.05.062](https://doi.org/10.1016/j.jss.2015.05.062)
58. Chew SH, Ibrahim I, Yong YZ, et al. Factors influencing the decision to pursue emergency medicine as a career among medical students in Singapore. *Singapore Med J*. 2018;59(3):126-132. doi:[10.11622/smedj.2018027](https://doi.org/10.11622/smedj.2018027)
59. Chew YW, Rajakrishnan S, Low CA, Jayapalan PK, Sreeramareddy CT. Medical students' choice of specialty and factors determining their choice: a cross-sectional questionnaire survey in Melaka-Manipal Medical College, Malaysia. *Biosci Trends*. 2011;5(2):69-76. doi:[10.5582/bst.2011.v5.2.69](https://doi.org/10.5582/bst.2011.v5.2.69)
60. Chung C, Maisonneuve H, Pfarrwaller E, et al. Impact of the primary care curriculum and its teaching formats on medical students' perception of primary care: a cross-sectional study. *BMC Fam Pract*. 2016;17(1):135. doi:[10.1186/s12875-016-0532-x](https://doi.org/10.1186/s12875-016-0532-x)
61. Cichon M, Feldman GL. Opportunities to improve recruitment into medical genetics residency programs: survey results of program directors and medical genetics residents. *Genet Med*. 2014;16(5):413-418. doi:[10.1038/gim.2013.161](https://doi.org/10.1038/gim.2013.161)
62. Clayton R, Lambert T, Burge SM. Career choices in dermatology. *Clin Exp Dermatol*. 2010;35(1):86-90. doi:[10.1111/j.1365-2230.2009.03397.x](https://doi.org/10.1111/j.1365-2230.2009.03397.x)
63. Clayton R, Trotter T. The impact of undergraduate education in radiation oncology. *J Cancer Educ*. 2013;28(1):192-196. doi:[10.1007/s13187-013-0458-0](https://doi.org/10.1007/s13187-013-0458-0)
64. Cochran A, Melby S, Neumayer LA. An Internet-based survey of factors influencing medical student selection of a general surgery career. *Am J Surg*. 2005;189(6):742-746. doi:[10.1016/j.amjsurg.2005.03.019](https://doi.org/10.1016/j.amjsurg.2005.03.019)
65. Codsí MP, Rodrigue R, Authier M, Diallo FB. Family medicine rotations and medical students' intention to pursue family medicine: Descriptive study. *Can Fam Physician*. 2019;65(7):316-320.
66. Corbett EC, Owen JA, Hayden GF. Effect of a second-year primary care preceptorship on medical students' career plans. *South Med J*. 2002;95(7):691-694.
67. Correia Lima de Souza L, Mendonça VRR, Garcia GBC, Brandão EC, Barral-Netto M. Medical Specialty Choice and Related Factors of Brazilian Medical Students and Recent Doctors. *PLoS One*. 2015;10(7):e0133585. doi:[10.1371/journal.pone.0133585](https://doi.org/10.1371/journal.pone.0133585)
68. Cohan GN, Kilic A, Gleason TG, et al. Medical student perceptions of a career in cardiothoracic surgery: Results of an institutional survey. *J Thorac Cardiovasc Surg*. 2020;159(5):1906-1912. doi:[10.1016/j.jtcvs.2019.07.022](https://doi.org/10.1016/j.jtcvs.2019.07.022)
69. Croghan SM, Baker T. The Great Gamble? A Mixed-Methods Study of Factors Influencing Medical Students in Specialty Choice. *J R Coll Physicians Edinb*. 2020;50(4):422-430. doi:[10.4997/JRCPE.2020.418](https://doi.org/10.4997/JRCPE.2020.418)
70. Cronin C, Lucas M, McCarthy A, et al. Are we reaping what we sow? Gender diversity in surgery: a survey of medical students. *Postgrad Med J*. 2019;95(1121):119-124. doi:[10.1136/postgradmedj-2018-136136](https://doi.org/10.1136/postgradmedj-2018-136136)
71. Dallas J, Mummareddy N, Yengo-Kahn AM, et al. Neurosurgery Elective for Preclinical Medical Students with and without a Home Neurosurgery Program. *World Neurosurg*. 2019;131:e201-e210. doi:[10.1016/j.wneu.2019.07.112](https://doi.org/10.1016/j.wneu.2019.07.112)
72. Daniels VJ, Kassam N. Determinants of internal medicine residents' choice in the Canadian R4 fellowship match: a qualitative study. *BMC Med Educ*. 2011;11:44. doi:[10.1186/1472-6920-11-44](https://doi.org/10.1186/1472-6920-11-44)

73. Davis CR, O'Donoghue JM, McPhail J, Green AR. How to improve plastic surgery knowledge, skills and career interest in undergraduates in one day. *J Plast Reconstr Aesthet Surg*. 2010;63(10):1677-1681. doi:[10.1016/j.bjps.2009.10.023](https://doi.org/10.1016/j.bjps.2009.10.023)
74. Day KM, Schwartz TM, Rao V, et al. Medical student clerkship performance and career selection after a junior medical student surgical mentorship program. *Am J Surg*. 2016;211(2):431-436. doi:[10.1016/j.amjsurg.2015.10.007](https://doi.org/10.1016/j.amjsurg.2015.10.007)
75. de Cates AN, de Cates P, Singh SP, Marwaha S. Can curriculum design influence medical students' attitudes to psychiatry? A comparison of two different approaches. *Med Teach*. 2019;41(8):939-948. doi:[10.1080/0142159X.2019.1602253](https://doi.org/10.1080/0142159X.2019.1602253)
76. DeBolle SA, Mazurek A, Hwang CD, et al. Development of an Academic Surgical Student Program for Enhancing Student-Faculty Engagement. *J Surg Educ*. 2019;76(3):604-606. doi:[10.1016/j.jsurg.2018.11.007](https://doi.org/10.1016/j.jsurg.2018.11.007)
77. Deutsch T, Lippmann S, Frese T, Sandholzer H. [Recruitment for general practice - relationship between practice-based curriculum and career choice]. *Gesundheitswesen*. 2014;76(1):26-31. doi:[10.1055/s-0033-1334933](https://doi.org/10.1055/s-0033-1334933)
78. Deutsch T, Hönigschmid P, Frese T, Sandholzer H. Early community-based family practice elective positively influences medical students' career considerations--a pre-post-comparison. *BMC Fam Pract*. 2013;14:24. doi:[10.1186/1471-2296-14-24](https://doi.org/10.1186/1471-2296-14-24)
79. Deutsch T, Lippmann S, Frese T, Sandholzer H. Who wants to become a general practitioner? Student and curriculum factors associated with choosing a GP career--a multivariable analysis with particular consideration of practice-orientated GP courses. *Scand J Prim Health Care*. 2015;33(1):47-53. doi:[10.3109/02813432.2015.1020661](https://doi.org/10.3109/02813432.2015.1020661)
80. Dever GE, Eveland AP, Tedders SH, Fehlenberg RD, Laurens MB, Harrelson JC. Impact of a population-based medical curriculum on specialty choice. *J Health Care Poor Underserved*. 2001;12(3):261-271. doi:[10.1353/hpu.2010.0817](https://doi.org/10.1353/hpu.2010.0817)
81. Dewey RB, Agostini M. Attitudes and performance of third- vs fourth-year neurology clerkship students. *Arch Neurol*. 2010;67(5):548-551. doi:[10.1001/archneurol.2010.64](https://doi.org/10.1001/archneurol.2010.64)
82. Dogbey GY, Collins K, Russ R, Brannan GD, Mivsek M, Sewell S. Factors Associated With Osteopathic Primary Care Residency Choice Decisions. *J Am Osteopath Assoc*. 2018;118(4):225-233. doi:[10.7556/jaoa.2018.046](https://doi.org/10.7556/jaoa.2018.046)
83. Doucet H, Shah MK, Cummings TL, Kahn MJ. Comparison of internal medicine, pediatric, and medicine/pediatrics applicants and factors influencing career choices. *South Med J*. 1999;92(3):296-299. doi:[10.1097/00007611-199903000-00007](https://doi.org/10.1097/00007611-199903000-00007)
84. Drolet BC, Sangisetty S, Mulvaney PM, Ryder BA, Cioffi WG. A mentorship-based preclinical elective increases exposure, confidence, and interest in surgery. *Am J Surg*. 2014;207(2):179-186. doi:[10.1016/j.amjsurg.2013.07.031](https://doi.org/10.1016/j.amjsurg.2013.07.031)
85. Dunkley L, Filer A, Speden D, Bax D, Crisp A. Why do we choose rheumatology? Implications for future recruitment--results of the 2006 UK Trainee Survey. *Rheumatology (Oxford)*. 2008;47(6):901-906. doi:[10.1093/rheumatology/ken063](https://doi.org/10.1093/rheumatology/ken063)
86. Ek EW, Ek ET, Mackay SD. Undergraduate experience of surgical teaching and its influence and its influence on career choice. *ANZ J Surg*. 2005;75(8):713-718. doi:[10.1111/j.1445-2197.2005.03500.x](https://doi.org/10.1111/j.1445-2197.2005.03500.x)
87. Ekenze SO, Ugwumba FO, Obi UM, Ekenze OS. Undergraduate surgery clerkship and the choice of surgery as a career: perspective from a developing country. *World J Surg*. 2013;37(9):2094-2100. doi:[10.1007/s00268-013-2073-y](https://doi.org/10.1007/s00268-013-2073-y)
88. Ellsbury KE, Burack JH, Irby DM, et al. The shift to primary care: emerging influences on specialty choice. *Acad Med*. 1996;71(10 Suppl):S16-18. doi:[10.1097/00001888-199610000-00031](https://doi.org/10.1097/00001888-199610000-00031)
89. Ellsbury KE, Carline JD, Irby DM, Stritter FT. Influence of Third-Year Clerkships on Medical Student Specialty Preferences. *Adv Health Sci Educ Theory Pract*. 1998;3(3):177-186. doi:[10.1023/A:1009748211832](https://doi.org/10.1023/A:1009748211832)
90. Erraji M, Kharraji A, Abbasi N, Najib A, Yacoubi H. Why medical students choose orthopedic surgery as a specialty? *Pan Afr Med J*. 2015;20:364. doi:[10.11604/pamj.2015.20.364.5807](https://doi.org/10.11604/pamj.2015.20.364.5807)
91. Erzurum VZ, Obermeyer RJ, Fecher A, et al. What influences medical students' choice of surgical careers. *Surgery*. 2000;128(2):253-256. doi:[10.1067/msy.2000.108214](https://doi.org/10.1067/msy.2000.108214)
92. Farooq K, Lydall GJ, Malik A, Ndeti DM, ISOSCCIP Group, Bhugra D. Why medical students choose psychiatry - a 20 country cross-sectional survey. *BMC Med Educ*. 2014;14:12. doi:[10.1186/1472-6920-14-12](https://doi.org/10.1186/1472-6920-14-12)
93. Fehlmann A, Abbiati M, Dällenbach P, Savoldelli LG. Motives influencing students' preferences for obstetrics and gynaecology speciality: A cross-sectional multi-site Swiss study. *Eur J Obstet Gynecol Reprod Biol*. 2019;237:157-163. doi:[10.1016/j.ejogrb.2019.04.036](https://doi.org/10.1016/j.ejogrb.2019.04.036)
94. Feit J. Factors that influence physician career choice. A survey of Virginia medical students. *Va Med Q*. 1994;121(3):154-158.
95. Fereydooni A, Ramirez JL, Morrow KL, Chandra V, Coleman DM, Lee JT. Factors influencing medical student choices in the integrated vascular surgery match: Implications for future post-pandemic residency matches. *J Vasc Surg*. 2021;74(4):1354-1361.e4. doi:[10.1016/j.jvs.2021.05.014](https://doi.org/10.1016/j.jvs.2021.05.014)
96. Firth A, Wass V. The impact of general practice attachments on foundation doctors: achieving the goals of Modernising Medical Careers. *Educ Prim Care*. 2011;22(5):314-320. doi:[10.1080/14739879.2011.11494025](https://doi.org/10.1080/14739879.2011.11494025)

97. Fitzgerald JEF, Tang SW, Ravindra P, Maxwell-Armstrong CA. Gender-related perceptions of careers in surgery among new medical graduates: results of a cross-sectional study. *Am J Surg*. 2013;206(1):112-119. doi:[10.1016/j.amjsurg.2012.04.009](https://doi.org/10.1016/j.amjsurg.2012.04.009)
98. Fogarty CA, Bonebrake RG, Fleming AD, Haynatzki G. Obstetrics and gynecology--to be or not to be? Factors influencing one's decision. *Am J Obstet Gynecol*. 2003;189(3):652-654. doi:[10.1067/s0002-9378\(03\)00880-9](https://doi.org/10.1067/s0002-9378(03)00880-9)
99. Ford CD, Patel PG, Sierpina VS, Wolffarth MW, Rowen JL. Longitudinal Continuity Learning Experiences and Primary Care Career Interest: Outcomes from an Innovative Medical School Curriculum. *J Gen Intern Med*. 2018;33(10):1817-1821. doi:[10.1007/s11606-018-4600-x](https://doi.org/10.1007/s11606-018-4600-x)
100. Ford JC. Influence of a problem-based learning curriculum on the selection of pathology as a career: evidence from the Canadian match of 1993-2004. *Hum Pathol*. 2005;36(6):600-604. doi:[10.1016/j.humpath.2005.04.003](https://doi.org/10.1016/j.humpath.2005.04.003)
101. Foster EA. Long-term follow-up of an alternative medical curriculum. *Acad Med*. 1994;69(6):501-506. doi:[10.1097/00001888-199406000-00019](https://doi.org/10.1097/00001888-199406000-00019)
102. Frey J, Neeley B, Umer A, et al. Training in Neurology: Neuro Day: An Innovative Curriculum Connecting Medical Students With Patients. *Neurology*. 2021;96(10):e1482-e1486. doi:[10.1212/WNL.00000000000010859](https://doi.org/10.1212/WNL.00000000000010859)
103. Gami M, Howe A. Experience adds up! Questionnaire study: attitudes of medical students towards a career in general practice. *Educ Prim Care*. 2020;31(2):89-97. doi:[10.1080/14739879.2020.1713026](https://doi.org/10.1080/14739879.2020.1713026)
104. Gawad N, Moussa F, Christakis GT, Rutka JT. Planting the "SEAD": early comprehensive exposure to surgery for medical students. *J Surg Educ*. 2013;70(4):487-494. doi:[10.1016/j.jsurg.2013.03.006](https://doi.org/10.1016/j.jsurg.2013.03.006)
105. Gebhard A, Müller-Hilke B. Criteria of medical students for the selection of their future clinical specialisation: a cross-sectional survey at the Medical Faculty of Rostock. *GMS J Med Educ*. 2019;36(6):Doc76. doi:[10.3205/zma001284](https://doi.org/10.3205/zma001284)
106. Glasbey J, Sinclair P, Mohan H, Harries R, ASiT 40-4-40 Course Organisers. 40-4-40: educational and economic outcomes of a free, international surgical training event. *Postgrad Med J*. 2017;93(1106):730-735. doi:[10.1136/postgradmedj-2017-134874](https://doi.org/10.1136/postgradmedj-2017-134874)
107. Goldacre MJ, Fazel S, Smith F, Lambert T. Choice and rejection of psychiatry as a career: surveys of UK medical graduates from 1974 to 2009. *Br J Psychiatry*. 2013;202(3):228-234. doi:[10.1192/bjp.bp.112.111153](https://doi.org/10.1192/bjp.bp.112.111153)
108. Goldacre MJ, Laxton L, Harrison EM, Richards JM, Lambert TW, Parks RW. Early career choices and successful career progression in surgery in the UK: prospective cohort studies. *BMC Surg*. 2010;10:32. doi:[10.1186/1471-2482-10-32](https://doi.org/10.1186/1471-2482-10-32)
109. Golden AG, van Zuilen MH, Mintzer MJ, Issenberg SB, Silverman MA, Roos BA. A fourth-year medical school clerkship that addressed negative attitudes toward geriatric medicine. *J Am Geriatr Soc*. 2010;58(4):746-750. doi:[10.1111/j.1532-5415.2010.02774.x](https://doi.org/10.1111/j.1532-5415.2010.02774.x)
110. Golden DW, Spektor A, Rudra S, et al. Radiation oncology medical student clerkship: implementation and evaluation of a bi-institutional pilot curriculum. *Int J Radiat Oncol Biol Phys*. 2014;88(1):45-50. doi:[10.1016/j.ijrobp.2013.10.041](https://doi.org/10.1016/j.ijrobp.2013.10.041)
111. Goldenberg MN, Williams DK, Spollen JJ. Stability of and Factors Related to Medical Student Specialty Choice of Psychiatry. *Am J Psychiatry*. 2017;174(9):859-866. doi:[10.1176/appi.ajp.2017.17020159](https://doi.org/10.1176/appi.ajp.2017.17020159)
112. Goldman D, Martin J, Bercu Z, Newsome J, Grimm L. Differential Motivations for Pursuing Interventional Radiology: Implications for Residency Recruitment. *J Am Coll Radiol*. 2019;16(1):82-88. doi:[10.1016/j.jacr.2018.08.002](https://doi.org/10.1016/j.jacr.2018.08.002)
113. Grayson MS, Klein M, Franke KB. Impact of a first-year primary care experience on residency choice. *J GEN INTERN MED*. 2001;16(12):860-863. doi:[10.1046/j.1525-1497.2001.10117.x](https://doi.org/10.1046/j.1525-1497.2001.10117.x)
114. Greene B, Head L, Gawad N, Hamstra SJ, McLean L. Surgical exploration and discovery program: inaugural involvement of otolaryngology - head and neck surgery. *J Otolaryngol Head Neck Surg*. 2015;44:3. doi:[10.1186/s40463-015-0059-5](https://doi.org/10.1186/s40463-015-0059-5)
115. Grimm LJ, Lowell DA, Cater SW, Yoon SC. Differential Motivations for Pursuing Diagnostic Radiology by Gender: Implications for Residency Recruitment. *Acad Radiol*. 2017;24(10):1312-1317. doi:[10.1016/j.acra.2017.03.023](https://doi.org/10.1016/j.acra.2017.03.023)
116. Guilloux AGA, Ramos JA, Citron I, et al. Profiling recent medical graduates planning to pursue surgery, anesthesia and obstetrics in Brazil. *BMC Med Educ*. 2019;19(1):136. doi:[10.1186/s12909-019-1562-6](https://doi.org/10.1186/s12909-019-1562-6)
117. Guraya SY, Almaramhy HH. Mapping the factors that influence the career specialty preferences by the undergraduate medical students. *Saudi J Biol Sci*. 2018;25(6):1096-1101. doi:[10.1016/j.sjbs.2017.03.019](https://doi.org/10.1016/j.sjbs.2017.03.019)
118. Gutiérrez-Cirlos C, Naveja JJ, García-Minjares M, Martínez-González A, Sánchez-Mendiola M. Specialty choice determinants among Mexican medical students: a cross-sectional study. *BMC Med Educ*. 2019;19(1):420. doi:[10.1186/s12909-019-1830-5](https://doi.org/10.1186/s12909-019-1830-5)
119. Gutmann L, Cahill C, Jordan JT, et al. Characteristics of graduating US allopathic medical students pursuing a career in neurology. *Neurology*. 2019;92(17):e2051-e2063. doi:[10.1212/WNL.00000000000007369](https://doi.org/10.1212/WNL.00000000000007369)

120. Hagopian TM, Vitiello GA, Hart AM, Perez SD, Sweeney JF, Pettitt BJ. Does the amount of time medical students spend in the operating room during the general surgery core clerkship affect their career decision? *Am J Surg*. 2015;210(1):167-172. doi:[10.1016/j.amisurg.2014.10.031](https://doi.org/10.1016/j.amisurg.2014.10.031)
121. Halaas GW, Zink T, Finstad D, Bolin K, Center B. Recruitment and retention of rural physicians: outcomes from the rural physician associate program of Minnesota. *J Rural Health*. 2008;24(4):345-352. doi:[10.1111/j.1748-0361.2008.00180.x](https://doi.org/10.1111/j.1748-0361.2008.00180.x)
122. Hammoud MM, Stansfield RB, Katz NT, Dugoff L, McCarthy J, White CB. The effect of the obstetrics and gynecology clerkship on students' interest in a career in obstetrics and gynecology. *Am J Obstet Gynecol*. 2006;195(5):1422-1426. doi:[10.1016/j.ajog.2006.07.044](https://doi.org/10.1016/j.ajog.2006.07.044)
123. Harris MG, Gavel PH, Young JR. Factors influencing the choice of specialty of Australian medical graduates. *Med J Aust*. 2005;183(6):295-300. doi:[10.5694/j.1326-5377.2005.tb07058.x](https://doi.org/10.5694/j.1326-5377.2005.tb07058.x)
124. Hassoulas A, Forty E, Hoskins M, Walters J, Riley S. A case-based medical curriculum for the 21st century: The use of innovative approaches in designing and developing a case on mental health. *Med Teach*. 2017;39(5):505-511. doi:[10.1080/0142159X.2017.1296564](https://doi.org/10.1080/0142159X.2017.1296564)
125. Hauer KE, Durning SJ, Kernan WN, et al. Factors associated with medical students' career choices regarding internal medicine. *JAMA*. 2008;300(10):1154-1164. doi:[10.1001/jama.300.10.1154](https://doi.org/10.1001/jama.300.10.1154)
126. Hauer KE, Fagan MJ, Kernan W, Mintz M, Durning SJ. Internal medicine clerkship directors' perceptions about student interest in internal medicine careers. *J Gen Intern Med*. 2008;23(7):1101-1104. doi:[10.1007/s11606-008-0640-y](https://doi.org/10.1007/s11606-008-0640-y)
127. Hawthorne MR, Dinh A. Meeting the demand of the future: a curriculum to stimulate interest in careers in primary care internal medicine. *Med Educ Online*. 2017;22(1):1340780. doi:[10.1080/10872981.2017.1340780](https://doi.org/10.1080/10872981.2017.1340780)
128. Head L, Greene B, Gawad N, et al. Growing the "SEAD": Expansion of the Surgical Exploration and Discovery Program. *J Surg Educ*. 2016;73(1):101-110. doi:[10.1016/j.jsurg.2015.08.001](https://doi.org/10.1016/j.jsurg.2015.08.001)
129. Henderson E, Berlin A, Fuller J. Attitude of medical students towards general practice and general practitioners. *Br J Gen Pract*. 2002;52(478):359-363.
130. Henderson MC, Hunt DK, Williams JW. General internists influence students to choose primary care careers: the power of role modeling. *Am J Med*. 1996;101(6):648-653. doi:[10.1016/S0002-9343\(96\)00334-8](https://doi.org/10.1016/S0002-9343(96)00334-8)
131. Herold AH, Woodard LJ, Pamies RJ, Roetzheim RG, Van Durme DJ, Micceri T. Influence of longitudinal primary care training on medical students' specialty choices. *Acad Med*. 1993;68(4):281-284. doi:[10.1097/00001888-199304000-00015](https://doi.org/10.1097/00001888-199304000-00015)
132. Hicks KE, Doubova M, Winter RM, Seabrook C, Brandys T. Surgical Exploration and Discovery Program: Early Exposure to Surgical Subspecialties and Its Influence on Student Perceptions of a Surgical Career. *J Surg Educ*. 2019;76(5):1248-1257. doi:[10.1016/j.jsurg.2019.03.001](https://doi.org/10.1016/j.jsurg.2019.03.001)
133. Higgins G, Thomson SE. The introduction of plastic and reconstructive surgery to the University of Glasgow undergraduate medical core curriculum. *Postgrad Med J*. 2020;96(1132):64-66. doi:[10.1136/postgradmedj-2019-137046](https://doi.org/10.1136/postgradmedj-2019-137046)
134. Histing T, Jung J, Wincheringer D, et al. [Practical courses for students can not only improve the teaching quality but can also increase the attractiveness of orthopaedic and trauma surgery]. *Z Orthop Unfall*. 2013;151(4):389-393. doi:[10.1055/s-0033-1350747](https://doi.org/10.1055/s-0033-1350747)
135. Hoffhansl A, Körmöczy GF. [An extensive mentoring program for undergraduate medical students: goals, design and realization]. *Wien Med Wochenschr*. 2014;164(11-12):213-219. doi:[10.1007/s10354-014-0286-9](https://doi.org/10.1007/s10354-014-0286-9)
136. Holm-Petersen C, Vinge S, Hansen J, Gyrd-Hansen D. The impact of contact with psychiatry on senior medical students' attitudes toward psychiatry. *Acta Psychiatr Scand*. 2007;116(4):308-311. doi:[10.1111/j.1600-0447.2007.01036.x](https://doi.org/10.1111/j.1600-0447.2007.01036.x)
137. Holt C, Mirvis R, Bao J, et al. Three-Year Longitudinal Follow-up of the Psychiatry Early Experience Program (PEEP): Gaining and Sustaining Positive Attitudes Towards Psychiatry in Students at a UK Medical School. *Acad Psychiatry*. 2019;43(6):600-604. doi:[10.1007/s40596-019-01092-0](https://doi.org/10.1007/s40596-019-01092-0)
138. Hon NWL, Hussein N, Honjo O, Yoo SJ. Evaluating the Impact of Medical Student Inclusion Into Hands-On Surgical Simulation in Congenital Heart Surgery. *J Surg Educ*. 2021;78(1):207-213. doi:[10.1016/j.jsurg.2020.06.023](https://doi.org/10.1016/j.jsurg.2020.06.023)
139. Hor ESL, Russell V, Vasudevan U, O' Brien F. Changing attitudes to psychiatry and interest in the specialty as a career choice during clinical undergraduate years at a medical school in Penang, Malaysia. *Ir J Med Sci*. 2020;189(1):253-259. doi:[10.1007/s11845-019-02064-x](https://doi.org/10.1007/s11845-019-02064-x)
140. Howe A, Ives G. Does community-based experience alter career preference? New evidence from a prospective longitudinal cohort study of undergraduate medical students. *Med Educ*. 2001;35(4):391-397. doi:[10.1046/j.1365-2923.2001.00866.x](https://doi.org/10.1046/j.1365-2923.2001.00866.x)
141. Hunt DK, Badgett RG, Woodling AE, Pugh JA. Medical student career choice: do physical diagnosis preceptors influence decisions? *Am J Med Sci*. 1995;310(1):19-23. doi:[10.1097/0000441-199507000-00007](https://doi.org/10.1097/0000441-199507000-00007)
142. Huntington WP, Haines N, Patt JC. What factors influence applicants' rankings of orthopaedic surgery residency programs in the National Resident Matching Program? *Clin Orthop Relat Res*. 2014;472(9):2859-2866. doi:[10.1007/s11999-014-3692-9](https://doi.org/10.1007/s11999-014-3692-9)

143. Ibrahim H, Nair SC, Shaban S, El-Zubeir M. Reducing the physician workforce crisis: Career choice and graduate medical education reform in an emerging Arab country. *Educ Health (Abingdon)*. 2016;29(2):82-88. doi:[10.4103/1357-6283.188716](https://doi.org/10.4103/1357-6283.188716)
144. Ibrahim M, Fanshawe A, Patel V, et al. What factors influence British medical students' career intentions? *Med Teach*. 2014;36(12):1064-1072. doi:[10.3109/0142159X.2014.923560](https://doi.org/10.3109/0142159X.2014.923560)
145. Jagadeesan VS, Raleigh DR, Koshy M, Howard AR, Chmura SJ, Golden DW. A national radiation oncology medical student clerkship survey: didactic curricular components increase confidence in clinical competency. *Int J Radiat Oncol Biol Phys*. 2014;88(1):51-56. doi:[10.1016/j.ijrobp.2013.11.206](https://doi.org/10.1016/j.ijrobp.2013.11.206)
146. Jayakumar N, Ahmed K, Challacombe B. Factors affecting UK medical students' decision to train in urology: a national survey. *Minerva Urol Nefrol*. 2016;68(5):409-416.
147. Johnson AL, Sharma J, Chinchilli VM, et al. Why do medical students choose orthopaedics as a career? *J Bone Joint Surg Am*. 2012;94(11):78. doi:[10.2106/JBJS.K.00826](https://doi.org/10.2106/JBJS.K.00826)
148. Joiner AB, Mahmood S, Dearman SP, Maddicott S. Foundation trainees and changes in career intentions. *Australas Psychiatry*. 2018;26(1):98-101. doi:[10.1177/1039856217737882](https://doi.org/10.1177/1039856217737882)
149. Kaderli R, Buser C, Stefenelli U, Businger A. Students' interest in becoming a general surgeon before and after a surgical clerkship in German-speaking Switzerland. *Swiss Med Wkly*. 2011;141:w13246. doi:[10.4414/smw.2011.13246](https://doi.org/10.4414/smw.2011.13246)
150. Kahn SA, Goldman M, Daul M, Lentz CW. The burn surgeon: an endangered species. Can exposure in medical school increase interest in burn surgery? *J Burn Care Res*. 2011;32(1):39-45. doi:[10.1097/BCR.0b013e318204b318](https://doi.org/10.1097/BCR.0b013e318204b318)
151. Kansayisa G, Yi S, Lin Y, Costas-Chavarri A. Gender-based analysis of factors affecting junior medical students' career selection: addressing the shortage of surgical workforce in Rwanda. *Hum Resour Health*. 2018;16(1):29. doi:[10.1186/s12960-018-0295-7](https://doi.org/10.1186/s12960-018-0295-7)
152. Kapoor N, Smith SE. Association between medical school radiology curricula and application rates to US radiology residency programs. *J Am Coll Radiol*. 2014;11(11):1064-1068. doi:[10.1016/j.jacr.2014.05.002](https://doi.org/10.1016/j.jacr.2014.05.002)
153. Karmali RJ, Siu JM, You DZ, et al. The Surgical Skills and Technology Elective Program (SSTEP): A comprehensive simulation-based surgical skills initiative for preclerkship medical students. *Am J Surg*. 2018;216(2):375-381. doi:[10.1016/j.amjsurg.2017.09.012](https://doi.org/10.1016/j.amjsurg.2017.09.012)
154. Kassebaum DG, Szenas PL, Schuchert MK. Determinants of the generalist career intentions of 1995 graduating medical students. *Acad Med*. 1996;71(2):198-209. doi:[10.1097/00001888-199602000-00030](https://doi.org/10.1097/00001888-199602000-00030)
155. Keepes GJ. Survey of influencing factors to a career in family medicine. *Indiana Med*. 1995;88(1):28-31.
156. Kerfoot BP, Nabha KS, Masser BA, McCullough DL. What makes a medical student avoid or enter a career in urology? Results of an international survey. *J Urol*. 2005;174(5):1953-1957. doi:[10.1097/01.ju.0000177462.61257.4e](https://doi.org/10.1097/01.ju.0000177462.61257.4e)
157. Khader Y, Al-Zoubi D, Amarin Z, et al. Factors affecting medical students in formulating their specialty preferences in Jordan. *BMC Med Educ*. 2008;8:32. doi:[10.1186/1472-6920-8-32](https://doi.org/10.1186/1472-6920-8-32)
158. Khater-Menassa B, Major S. Factors influencing the choice of specialty among medical students in Lebanon. *J Med Liban*. 2005;53(1):16-20.
159. Knox KE, Getzin A, Bergum A, McBride P, Rieselbach R, Friedsam D. Short report: factors that affect specialty choice and career plans of Wisconsin's medical students. *WMJ*. 2008;107(8):369-373.
160. Kolasinski SL, Bass AR, Kane-Wanger GF, Libman BS, Sandorfi N, Utset T. Subspecialty choice: why did you become a rheumatologist? *Arthritis Rheum*. 2007;57(8):1546-1551. doi:[10.1002/art.23100](https://doi.org/10.1002/art.23100)
161. Kost A, Bentley A, Phillips J, Kelly C, Prunuske J, Morley CP. Graduating Medical Student Perspectives on Factors Influencing Specialty Choice An AAFP National Survey. *Fam Med*. 2019;51(2):129-136. doi:[10.22454/FamMed.2019.136973](https://doi.org/10.22454/FamMed.2019.136973)
162. Kozar RA, Anderson KD, Escobar-Chaves SL, Thiel MA, Brundage SI. Preclinical students: who are surgeons? *J Surg Res*. 2004;119(2):113-116. doi:[10.1016/j.jss.2004.03.024](https://doi.org/10.1016/j.jss.2004.03.024)
163. Kozar RA, Lucci A, Miller CC, et al. Brief intervention by surgeons can influence students toward a career in surgery. *J Surg Res*. 2003;111(1):166-169. doi:[10.1016/s0022-4804\(03\)00104-5](https://doi.org/10.1016/s0022-4804(03)00104-5)
164. Kraft M, Sayfie A, Klein K, Gruppen L, Quint L. Introducing First-Year Medical Students to Radiology: Implementation and Impact. *Acad Radiol*. 2018;25(6):780-788. doi:[10.1016/j.acra.2018.02.002](https://doi.org/10.1016/j.acra.2018.02.002)
165. Kreykes AJ, Petersen EH, Lowry CL. Expanding Knowledge and Exposure to Aerospace Medicine by Creating a Medical Student Curriculum. *Aerosp Med Hum Perform*. 2020;91(5):448-452. doi:[10.3357/AMHP.5531.2020](https://doi.org/10.3357/AMHP.5531.2020)
166. Kuhnigk O, Hofmann M, Böthern AM, Haufs C, Bullinger M, Harendza S. Influence of educational programs on attitudes of medical students towards psychiatry: Effects of psychiatric experience, gender, and personality dimensions. *Med Teach*. 2009;31(7):e303-310. doi:[10.1080/01421590802638048](https://doi.org/10.1080/01421590802638048)
167. Kumar R, Dhaliwal U. Career choices of undergraduate medical students. *Natl Med J India*. 2011;24(3):166-169.
168. Kumar V, Szeto H, Lehrman ED, et al. Expanding the Teaching Toolbox: Characterizing Utility of a Web-Based Lecture Series in Educating Future Colleagues and Referrers about the Field of IR. *J Vasc Interv Radiol*. 2019;30(4):589-593.e3. doi:[10.1016/j.jvir.2018.11.010](https://doi.org/10.1016/j.jvir.2018.11.010)
169. Kurlandsky LE, Potts M, Kumar A. Pediatric clerkship performance in diverse community clinical settings. *Pediatrics*. 1994;93(4):608-610.

170. Kurowecki D, Lee SY, Monteiro S, Finlay K. Resident Physicians' Perceptions of Diagnostic Radiology and the Declining Interest in the Specialty. *Acad Radiol*. 2021;28(2):261-270. doi:[10.1016/j.acra.2020.01.016](https://doi.org/10.1016/j.acra.2020.01.016)
171. Kuteesa J, Musiime V, Munabi IG, et al. Specialty career preferences among final year medical students at Makerere University College of health sciences, Uganda: a mixed methods study. *BMC Med Educ*. 2021;21(1):215. doi:[10.1186/s12909-021-02630-x](https://doi.org/10.1186/s12909-021-02630-x)
172. Kutikov A, Bonslaver J, Casey JT, et al. The gatekeeper disparity--why do some medical schools send more medical students into urology? *J Urol*. 2011;185(2):647-652. doi:[10.1016/j.juro.2010.09.113](https://doi.org/10.1016/j.juro.2010.09.113)
173. Lampe L, Coulston C, Walter G, Malhi G. Familiarity breeds respect: attitudes of medical students towards psychiatry following a clinical attachment. *Australas Psychiatry*. 2010;18(4):348-353. doi:[10.3109/10398561003739612](https://doi.org/10.3109/10398561003739612)
174. Lau T, Zamani D, Lee EK, et al. Factors affecting recruitment into psychiatry: a canadian experience. *Acad Psychiatry*. 2015;39(3):246-252. doi:[10.1007/s40596-014-0269-6](https://doi.org/10.1007/s40596-014-0269-6)
175. Lawal TA, Afolabi AO. Factors influencing the choice of surgery as a career by pre-registration interns. *Afr Health Sci*. 2013;13(3):814-819. doi:[10.4314/ahs.v13i3.42](https://doi.org/10.4314/ahs.v13i3.42)
176. Lebastchi AH, Khouri RK, McLaren ID, et al. The Urology Applicant: An Analysis of Contemporary Urology Residency Candidates. *Urology*. 2018;115:51-58. doi:[10.1016/j.urology.2017.10.065](https://doi.org/10.1016/j.urology.2017.10.065)
177. Lee EK, Kaltreider N, Crouch J. Pilot study of current factors influencing the choice of psychiatry as a specialty. *Am J Psychiatry*. 1995;152(7):1066-1069. doi:[10.1176/ajp.152.7.1066](https://doi.org/10.1176/ajp.152.7.1066)
178. Lee HJ, Jang HJ, Jang S, et al. Psychiatry curriculum: How does it affect medical students' attitude toward psychiatry? *Asian J Psychiatr*. 2022;67:102919. doi:[10.1016/j.ajp.2021.102919](https://doi.org/10.1016/j.ajp.2021.102919)
179. Lee JT, Son JH, Chandra V, Lilo E, Dalman RL. Long-term impact of a preclinical endovascular skills course on medical student career choices. *J Vasc Surg*. 2011;54(4):1193-1200. doi:[10.1016/j.jvs.2011.04.052](https://doi.org/10.1016/j.jvs.2011.04.052)
180. Lefevre JH, Roupert M, Kerneis S, Karila L. Career choices of medical students: a national survey of 1780 students. *Med Educ*. 2010;44(6):603-612. doi:[10.1111/j.1365-2923.2010.03707.x](https://doi.org/10.1111/j.1365-2923.2010.03707.x)
181. Leong FTL, Hardin EE, Gaylor M. Career specialty choice: A combined research-intervention project. *Journal of Vocational Behavior*. 2005;67(1):69-86. doi:[10.1016/j.jvb.2004.07.004](https://doi.org/10.1016/j.jvb.2004.07.004)
182. Lindeman BM, Lipsett PA, Alseidi A, Lidor AO. Medical student subinternships in surgery: characterization and needs assessment. *Am J Surg*. 2013;205(2):175-181. doi:[10.1016/j.amjsurg.2012.10.008](https://doi.org/10.1016/j.amjsurg.2012.10.008)
183. López-García M, Ayuso-Raya MC, López-Torres-Hidalgo J, Montoya-Fernández J, Campa-Valera F, Escobar-Rabadán F. At what stage in the undergraduate curriculum is it best to train in family medicine? A study from two medical schools in Spain. *Eur J Gen Pract*. 2019;25(2):91-97. doi:[10.1080/13814788.2019.1580264](https://doi.org/10.1080/13814788.2019.1580264)
184. Lou X, Enter D, Sheen L, et al. Sustained supervised practice on a coronary anastomosis simulator increases medical student interest in surgery, unsupervised practice does not. *Ann Thorac Surg*. 2013;95(6):2057-2063. doi:[10.1016/j.athoracsur.2013.02.045](https://doi.org/10.1016/j.athoracsur.2013.02.045)
185. Lukas RV, Ma C, Chen J, et al. Views on Careers in Clinical Neurosciences Among Neurosurgeons and Neurologists in China. *World Neurosurg*. 2017;98:532-537. doi:[10.1016/j.wneu.2016.11.054](https://doi.org/10.1016/j.wneu.2016.11.054)
186. Lyons Z, Hans D, Janca A. Future-proofing the psychiatry workforce in Australia: evaluation of an innovative enrichment programme for medical students. *Australas Psychiatry*. 2015;23(5):584-588. doi:[10.1177/1039856215597535](https://doi.org/10.1177/1039856215597535)
187. Lyons Z, Janca A. Impact of a psychiatry clerkship on stigma, attitudes towards psychiatry, and psychiatry as a career choice. *BMC Med Educ*. 2015;15:34. doi:[10.1186/s12909-015-0307-4](https://doi.org/10.1186/s12909-015-0307-4)
188. MacDowell M, Glasser M, Hunsaker M. A decade of rural physician workforce outcomes for the Rockford Rural Medical Education (RMED) Program, University of Illinois. *Acad Med*. 2013;88(12):1941-1947. doi:[10.1097/ACM.0000000000000031](https://doi.org/10.1097/ACM.0000000000000031)
189. Madan AK, Frantzides CT, Quiros R, Dujovny N, Tebbit C. Effects of a laparoscopic course on student interest in surgical residency. *JSL.S*. 2005;9(2):134-137.
190. Madani FM, Alasiri R, Howldar S, Zagzoog F, Alhibshi N. Perceptions and Career Expectation in Ophthalmology among Saudi Undergraduate Medical Students. *Middle East Afr J Ophthalmol*. 2018;25(3-4):142-149. doi:[10.4103/meajo.MEAJO\\_261\\_17](https://doi.org/10.4103/meajo.MEAJO_261_17)
191. Mahendran R, Lim HA, Verma S, Kua EH. The impact of the educational environment on career choice and attitudes toward psychiatry. *Med Teach*. 2015;37(5):494-497. doi:[10.3109/0142159X.2015.1009021](https://doi.org/10.3109/0142159X.2015.1009021)
192. Maiorova T, Stevens F, Scherpbier A, van der Zee J. The impact of clerkships on students' specialty preferences: what do undergraduates learn for their profession? *Med Educ*. 2008;42(6):554-562. doi:[10.1111/j.1365-2923.2008.03008.x](https://doi.org/10.1111/j.1365-2923.2008.03008.x)
193. Malikova MA, Doros G, Joglar F, Rybin D, Petros JG, Farber A. A third-year surgery clerkship with extensive exposure to vascular surgery improves knowledge about vascular disease and the role of vascular surgeons in its management. *Vasc Endovascular Surg*. 2010;44(5):361-367. doi:[10.1177/1538574410362111](https://doi.org/10.1177/1538574410362111)
194. Manassis K, Katz M, Lofchy J, Wiesenthal S. Choosing a career in psychiatry: influential factors within a medical school program. *Acad Psychiatry*. 2006;30(4):325-329. doi:[10.1176/appi.ap.30.4.325](https://doi.org/10.1176/appi.ap.30.4.325)

195. Markovic J, Peyser C, Cavoores T, Fletcher E, Peterson D, Shortell C. Impact of endovascular simulator training on vascular surgery as a career choice in medical students. *J Vasc Surg*. 2012;55(5):1515-1521. doi:[10.1016/j.jvs.2011.11.060](https://doi.org/10.1016/j.jvs.2011.11.060)
196. Martin VL, Bennett DS, Pitale M. Medical students' interest in child psychiatry: a clerkship intervention. *Acad Psychiatry*. 2007;31(3):225-227. doi:[10.1176/appi.ap.31.3.225](https://doi.org/10.1176/appi.ap.31.3.225)
197. Martini CJ, Veloski JJ, Barzansky B, Xu G, Fields SK. Medical school and student characteristics that influence choosing a generalist career. *JAMA*. 1994;272(9):661-668.
198. Matalon SA, Guenette JP, Smith SE, et al. Factors Influencing Choice of Radiology and Relationship to Resident Job Satisfaction. *Curr Probl Diagn Radiol*. 2019;48(4):333-341. doi:[10.1067/j.cpradiol.2018.03.008](https://doi.org/10.1067/j.cpradiol.2018.03.008)
199. Matsos M, Docherty-Skippen SM, Yelovich MC, Beattie KA. Factors that influence Canadian internal medicine residents' choice to pursue a rheumatology career. *Clin Rheumatol*. 2019;38(1):229-234. doi:[10.1007/s10067-018-4222-z](https://doi.org/10.1007/s10067-018-4222-z)
200. Matsumoto MM, Tullius TG, Navuluri R. Gender-Specific Factors Influencing Medical Students' Career Choice of IR. *J Vasc Interv Radiol*. 2019;30(9):1432-1437. doi:[10.1016/j.jvir.2019.04.012](https://doi.org/10.1016/j.jvir.2019.04.012)
201. Matthews C, Bagg W, Yelder J, Mogol V, Poole P. Does Pukawakawa (the regional-rural programme at the University of Auckland) influence workforce choice? *N Z Med J*. 2015;128(1409):35-43.
202. Maudsley G, Williams L, Taylor D. Medical students' and prospective medical students' uncertainties about career intentions: cross-sectional and longitudinal studies. *Med Teach*. 2010;32(3):e143-151. doi:[10.3109/01421590903386773](https://doi.org/10.3109/01421590903386773)
203. Mayes J, Davies S, Harris A, Wray E, Dark GG. Impact of a 2-Week Oncology Placement on Medical Students' Perception of Cancer. *J Cancer Educ*. 2018;33(1):174-179. doi:[10.1007/s13187-016-1101-7](https://doi.org/10.1007/s13187-016-1101-7)
204. Mazeh H, Mizrahi I, Eid A, Freund HR, Allweis TM. Medical students and general surgery--Israel's National Survey: lifestyle is not the sole issue. *J Surg Educ*. 2010;67(5):303-308. doi:[10.1016/j.jsurg.2010.07.015](https://doi.org/10.1016/j.jsurg.2010.07.015)
205. McCaffrey JC. Medical student selection of otolaryngology-head and neck surgery as a specialty: influences and attitudes. *Otolaryngol Head Neck Surg*. 2005;133(6):825-830. doi:[10.1016/j.otohns.2005.07.042](https://doi.org/10.1016/j.otohns.2005.07.042)
206. McCord JH, McDonald R, Sippel RS, Levenson G, Mahvi DM, Weber SM. Surgical career choices: the vital impact of mentoring. *J Surg Res*. 2009;155(1):136-141. doi:[10.1016/j.jss.2008.06.048](https://doi.org/10.1016/j.jss.2008.06.048)
207. McDonald C, Henderson A, Barlow P, Keith J. Assessing factors for choosing a primary care specialty in medical students: A longitudinal study. *Med Educ Online*. 2021;26(1):1890901. doi:[10.1080/10872981.2021.1890901](https://doi.org/10.1080/10872981.2021.1890901)
208. McHugh S, Corrigan M, Sheikh A, Lehane E, Tanner W, Hill A. Factors influencing career choice after initial training in surgery. *World J Surg*. 2011;35(3):487-492. doi:[10.1007/s00268-010-0934-1](https://doi.org/10.1007/s00268-010-0934-1)
209. McKechnie T, Springer JE, Doumouras AG, Schroeder T, Eskicioglu C, Reid S. Influence of undergraduate medical education exposure to cadaveric dissection on choice of surgical specialty: a national survey of Canadian surgical residents. *Can J Surg*. 2021;64(2):E183-E190. doi:[10.1503/cjs.018019](https://doi.org/10.1503/cjs.018019)
210. McKee ND, McKague MA, Ramsden VR, Poole RE. Cultivating interest in family medicine: family medicine interest group reaches undergraduate medical students. *Can Fam Physician*. 2007;53(4):661-665.
211. McLean M. Clinical role models are important in the early years of a problem-based learning curriculum. *Med Teach*. 2006;28(1):64-69. doi:[10.1080/01421590500441711](https://doi.org/10.1080/01421590500441711)
212. McParland M, Noble LM, Livingston G, McManus C. The effect of a psychiatric attachment on students' attitudes to and intention to pursue psychiatry as a career. *Med Educ*. 2003;37(5):447-454. doi:[10.1046/j.1365-2923.2003.01491.x](https://doi.org/10.1046/j.1365-2923.2003.01491.x)
213. Mehmood SI, Kumar A, Al-Binali A, Borleffs JCC. Specialty preferences: trends and perceptions among Saudi undergraduate medical students. *Med Teach*. 2012;34 Suppl 1:S51-60. doi:[10.3109/0142159X.2012.656753](https://doi.org/10.3109/0142159X.2012.656753)
214. Mihalyuk T, Leung G, Fraser J, Bates J, Snadden D. Free choice and career choice: Clerkship electives in medical education. *Med Educ*. 2006;40(11):1065-1071. doi:[10.1111/j.1365-2929.2006.02614.x](https://doi.org/10.1111/j.1365-2929.2006.02614.x)
215. Montgomery SC, Privette AR, Ferguson PL, Mirdamadi M, Fakhry SM. Inadequately marketing our brand: Medical student awareness of acute care surgery. *J Trauma Acute Care Surg*. 2015;79(5):858-864. doi:[10.1097/TA.0000000000000851](https://doi.org/10.1097/TA.0000000000000851)
216. Moore JN, McDiarmid AJ, Johnston PW, Cleland JA. Identifying and exploring factors influencing career choice, recruitment and retention of anaesthesia trainees in the UK. *Postgrad Med J*. 2017;93(1096):61-66. doi:[10.1136/postgradmedj-2015-133518](https://doi.org/10.1136/postgradmedj-2015-133518)
217. Morrison JM, Murray TS. Career preferences of medical students: influence of a new four-week attachment in general practice. *Br J Gen Pract*. 1996;46(413):721-725.
218. Mortlock AM, Puzzo I, Taylor S, et al. Enrichment activities in the medical school psychiatry programme - could this be a key to engaging medical students in psychiatry? A study from a high secure forensic psychiatric UK hospital. *BMC Psychiatry*. 2017;17(1):83. doi:[10.1186/s12888-017-1236-z](https://doi.org/10.1186/s12888-017-1236-z)
219. Mulcare MR, Suh EH, Tews M, Swan-Sein A, Pandit K. Third-year medical student rotations in emergency medicine: a survey of current practices. *Acad Emerg Med*. 2011;18 Suppl 2:S41-47. doi:[10.1111/j.1553-2712.2011.01187.x](https://doi.org/10.1111/j.1553-2712.2011.01187.x)

220. Mutha S, Takayama JI, O'Neil EH. Insights into medical students' career choices based on third- and fourth-year students' focus-group discussions. *Acad Med*. 1997;72(7):635-640. doi:[10.1097/00001888-199707000-00017](https://doi.org/10.1097/00001888-199707000-00017)
221. Nakhoul GN, Mehdi A, Taliencio JJ, et al. "What do you think about nephrology?" A national survey of internal medicine residents. *BMC Nephrol*. 2021;22(1):190. doi:[10.1186/s12882-021-02397-9](https://doi.org/10.1186/s12882-021-02397-9)
222. Ndetei DM, Ngumi ZW, Mutiso VN, Musyimi CW, Kamau LW. Factors that influence the choice of psychiatry as a career by medical students at the School of Medicine, College of Health Sciences, University of Nairobi. *Int Rev Psychiatry*. 2013;25(4):406-412. doi:[10.3109/09540261.2013.823383](https://doi.org/10.3109/09540261.2013.823383)
223. Nelson B, Medek S, Kharofa J, Struve T, Barrett W. The Impact of a Multidisciplinary Third-Year Oncology Elective Rotation on Decisions to Pursue Oncologic Careers and Oncology Exposure. *Int J Radiat Oncol Biol Phys*. 2020;108(4):886-890. doi:[10.1016/j.ijrobp.2020.06.027](https://doi.org/10.1016/j.ijrobp.2020.06.027)
224. Ng CWQ, Syn NL, Hussein RBM, Ng M, Kow AWC. Push and pull factors, and the role of residents in nurturing medical students' interest in surgery as a career option in a multicultural Asian context: Results of a prospective national cohort study. *Am J Surg*. 2020;220(6):1549-1556. doi:[10.1016/j.amjsurg.2020.04.036](https://doi.org/10.1016/j.amjsurg.2020.04.036)
225. Ng TSC, An BP, Cho SY, Hyun H. US Trainee and Faculty Perspectives on Exposure to Nuclear Medicine/Molecular Imaging During Medical School. *Curr Probl Diagn Radiol*. 2021;50(5):585-591. doi:[10.1067/j.cpradiol.2020.05.013](https://doi.org/10.1067/j.cpradiol.2020.05.013)
226. Ní Chróinín D, Cronin E, Cullen W, et al. Would you be a geriatrician? Student career preferences and attitudes to a career in geriatric medicine. *Age Ageing*. 2013;42(5):654-657. doi:[10.1093/ageing/afq093](https://doi.org/10.1093/ageing/afq093)
227. Noble J. Factors influencing career choice in ophthalmology. *Can J Ophthalmol*. 2006;41(5):596-599. doi:[10.1016/S0008-4182\(06\)80029-3](https://doi.org/10.1016/S0008-4182(06)80029-3)
228. Noble J, Schendel S, Daniel S, Baerlocher MO. Motivations and future trends: a survey of Canadian ophthalmology residents. *Can J Ophthalmol*. 2007;42(6):821-825. doi:[10.3129/107-156](https://doi.org/10.3129/107-156)
229. O'Donoghue S, McGrath D, Cullen W. How do longitudinal clerkships in general practice/primary care impact on student experience and career intention? A cross-sectional study of student experience. *Educ Prim Care*. 2015;26(3):166-175. doi:[10.1080/14739879.2015.11494336](https://doi.org/10.1080/14739879.2015.11494336)
230. O'Herrin JK, Lewis BJ, Ridders LF, Chen H. Medical student operative experience correlates with a match to a categorical surgical program. *Am J Surg*. 2003;186(2):125-128. doi:[10.1016/s0002-9610\(03\)00188-0](https://doi.org/10.1016/s0002-9610(03)00188-0)
231. Onyemaechi N, Bisi-Onyemaechi AI, Omoke NI, Odetunde OI, Okwesili IC, Okwara BO. Specialty choices: Patterns and determinants among medical undergraduates in Enugu Southeast Nigeria. *Niger J Clin Pract*. 2017;20(11):1474-1480. doi:[10.4103/njcp.njcp\\_382\\_16](https://doi.org/10.4103/njcp.njcp_382_16)
232. Osborn EH. Factors influencing students' choices of primary care or other specialties. *Acad Med*. 1993;68(7):572-574. doi:[10.1097/00001888-199307000-00018](https://doi.org/10.1097/00001888-199307000-00018)
233. Parekh R, Jones MM, Singh S, et al. Medical students' experience of the hidden curriculum around primary care careers: a qualitative exploration of reflective diaries. *BMJ Open*. 2021;11(7):e049825. doi:[10.1136/bmjopen-2021-049825](https://doi.org/10.1136/bmjopen-2021-049825)
234. Parker JE, Hudson B, Wilkinson TJ. Influences on final year medical students' attitudes to general practice as a career. *J Prim Health Care*. 2014;6(1):56-63.
235. Pearson J, Westra R. Early Course in Obstetrics Increases Likelihood of Practice Including Obstetrics. *Fam Med*. 2016;48(9):720-724.
236. Pearson SA, Rolfe I, Ringland C, Kay-Lambkin F. A comparison of practice outcomes of graduates from traditional and non-traditional medical schools in Australia. *Med Educ*. 2002;36(10):985-991. doi:[10.1046/j.1365-2923.2002.01281.x](https://doi.org/10.1046/j.1365-2923.2002.01281.x)
237. Peiffer-Smadja N, Ardellier FD, Thill P, et al. How and why do French medical students choose the specialty of infectious and tropical diseases? A national cross-sectional study. *BMC Med Educ*. 2020;20(1):397. doi:[10.1186/s12909-020-02317-9](https://doi.org/10.1186/s12909-020-02317-9)
238. Phillips J, Charnley I. Third- and Fourth-Year Medical Students' Changing Views of Family Medicine. *Fam Med*. 2016;48(1):54-60.
239. Pianosi K, Bethune C, Hurley KF. Medical student career choice: a qualitative study of fourth-year medical students at Memorial University, Newfoundland. *CMAJ Open*. 2016;4(2):E147-152. doi:[10.9778/cmajo.20150103](https://doi.org/10.9778/cmajo.20150103)
240. Piccinato CE, Rodrigues M de LV, Rocha L de A, Troncon LE de A. Characteristics of role models who influenced medical residents to choose surgery as a specialty: exploratory study. *Sao Paulo Med J*. 2017;135(6):529-534. doi:[10.1590/1516-3180.2017.0053030517](https://doi.org/10.1590/1516-3180.2017.0053030517)
241. Pointer DT, Freeman MD, Korndorffer JR, Meade PC, Jaffe BM, Slakey DP. Choosing Surgery: Identifying Factors Leading to Increased General Surgery Matriculation Rate. *Am Surg*. 2017;83(3):290-295. doi:[10.1177/000313481708300325](https://doi.org/10.1177/000313481708300325)
242. Pokrzywko K, Torres-Platas SG, Abdool PS, et al. Early Clinical Exposure to Geriatric Psychiatry and Medical Students' Interest in Caring for Older Adults: A Randomized Controlled Trial. *Am J Geriatr Psychiatry*. 2019;27(7):745-751. doi:[10.1016/j.jagp.2019.03.004](https://doi.org/10.1016/j.jagp.2019.03.004)
243. Polsky D, Werner RM. The future of child neurology: a profile of child neurology residents. *J Child Neurol*. 2004;19(1):6-13. doi:[10.1177/088307380401900102011](https://doi.org/10.1177/088307380401900102011)
244. Poole P, McHardy K, Janssen A. General physicians: born or made? The use of a tracking database to answer medical workforce questions. *Intern Med J*. 2009;39(7):447-452. doi:[10.1111/j.1445-5994.2008.01717.x](https://doi.org/10.1111/j.1445-5994.2008.01717.x)

245. Prud'homme J, Corvol A, Aguilon A, Olivieri M, Rousseau V, Somme D. Why choose geriatric medicine? A national survey among French postgraduate medical students. *Age Ageing*. 2020;49(6):1028-1033. doi:[10.1093/ageing/afaa120](https://doi.org/10.1093/ageing/afaa120)
246. Pullen SJ, White JC, Salgado CA, et al. Video-teleconferencing with medical students to improve exposure to child and adolescent psychiatry. *Acad Psychiatry*. 2013;37(4):268-270. doi:[10.1176/appi.ap.12040073](https://doi.org/10.1176/appi.ap.12040073)
247. Querido S, van den Broek S, de Rond M, Wigersma L, Ten Cate O. Factors affecting senior medical students' career choice. *Int J Med Educ*. 2018;9:332-339. doi:[10.5116/ijme.5c14.de75](https://doi.org/10.5116/ijme.5c14.de75)
248. Rahbar L, Moxley G, Carleton D, et al. Correlation of rheumatology subspecialty choice and identifiable strong motivations, including intellectual interest. *Arthritis Care Res (Hoboken)*. 2010;62(12):1796-1804. doi:[10.1002/acr.20284](https://doi.org/10.1002/acr.20284)
249. Ramaswamy RS, Fung D, Tiwari T, et al. Factors influencing selection of an interventional radiology training program. *Clin Imaging*. 2019;57:30-34. doi:[10.1016/j.clinimag.2019.05.001](https://doi.org/10.1016/j.clinimag.2019.05.001)
250. Rao RD, Khatib ON, Agarwal A. Factors Motivating Medical Students in Selecting a Career Specialty: Relevance for a Robust Orthopaedic Pipeline. *J Am Acad Orthop Surg*. 2017;25(7):527-535. doi:[10.5435/JAAOS-D-16-00533](https://doi.org/10.5435/JAAOS-D-16-00533)
251. Ravindra P, Fitzgerald JEF. Defining surgical role models and their influence on career choice. *World J Surg*. 2011;35(4):704-709. doi:[10.1007/s00268-011-0983-0](https://doi.org/10.1007/s00268-011-0983-0)
252. Ravindra P, Fitzgerald JEF, Bhangu A, Maxwell-Armstrong CA. Quantifying factors influencing operating theater teaching, participation, and learning opportunities for medical students in surgery. *J Surg Educ*. 2013;70(4):495-501. doi:[10.1016/j.jsurg.2013.02.011](https://doi.org/10.1016/j.jsurg.2013.02.011)
253. Ray JC, Hopson LR, Peterson W, et al. Choosing emergency medicine: Influences on medical students' choice of emergency medicine. *PLoS One*. 2018;13(5):e0196639. doi:[10.1371/journal.pone.0196639](https://doi.org/10.1371/journal.pone.0196639)
254. Redman S, Saltman D, Straton J, Young B, Paul C. Determinants of career choices among women and men medical students and interns. *Med Educ*. 1994;28(5):361-371. doi:[10.1111/j.1365-2923.1994.tb02546.x](https://doi.org/10.1111/j.1365-2923.1994.tb02546.x)
255. Rehman A, Rehman T, Shaikh MA, Yasmin H, Asif A, Kafil H. Pakistani medical students' specialty preference and the influencing factors. *J Pak Med Assoc*. 2011;61(7):713-718.
256. Retrouvey M, Trace AP, Goodmurphy CW, Shaves S. JOURNAL CLUB: Redefining the Radiology Curriculum in Medical School: Vertical Integration and Global Accessibility. *AJR Am J Roentgenol*. 2018;210(1):118-122. doi:[10.2214/AJR.17.18211](https://doi.org/10.2214/AJR.17.18211)
257. Roberts LJ, Khursandi DCS. Career choice influences in Australian anaesthetists. *Anaesth Intensive Care*. 2002;30(3):355-359. doi:[10.1177/0310057X0203000315](https://doi.org/10.1177/0310057X0203000315)
258. Rojnic Kuzman M, Smoljan M, Lovrec P, et al. Are there future psychiatrists among medical students in Croatia? The role of premedical and medical factors on career choice in psychiatry. *Int Rev Psychiatry*. 2013;25(4):472-480. doi:[10.3109/09540261.2013.804401](https://doi.org/10.3109/09540261.2013.804401)
259. Roy E, Anstadt EE, Losee JE, Nguyen VT, Goldstein JA. Evaluation of a Simulation-Based Mini-lective on Medical Student Interest in Plastic Surgery. *Plast Reconstr Surg*. 2021;148(3):527e-528e. doi:[10.1097/PRS.00000000000008288](https://doi.org/10.1097/PRS.00000000000008288)
260. Ruback RF, Donnelly MB, Jarecky RM, Murphy-Spencer AE, Harrell PL, Schwartz RW. Demographic, educational, and psychosocial factors influencing the choices of primary care and academic medical careers. *Acad Med*. 1995;70(4):318-320. doi:[10.1097/00001888-199504000-00016](https://doi.org/10.1097/00001888-199504000-00016)
261. Russo RA, Dallaghan GB, Balon R, et al. Millennials in Psychiatry: Exploring Career Choice Factors in Generation Y Psychiatry Interns. *Acad Psychiatry*. 2020;44(6):727-733. doi:[10.1007/s40596-020-01272-3](https://doi.org/10.1007/s40596-020-01272-3)
262. Ryan C, Ward E, Jones M. Recruitment and retention of trainee physicians: a retrospective analysis of the motivations and influences on career choice of trainee physicians. *QJM*. 2018;111(5):313-318. doi:[10.1093/qjmed/hcy032](https://doi.org/10.1093/qjmed/hcy032)
263. Saalwachter AR, Freischlag JA, Sawyer RG, Sanfey HA. The training needs and priorities of male and female surgeons and their trainees. *J Am Coll Surg*. 2005;201(2):199-205. doi:[10.1016/j.jamcollsurg.2005.03.016](https://doi.org/10.1016/j.jamcollsurg.2005.03.016)
264. Saberski ER, Orenstein SB, Matheson D, Novitsky YW. Real-time cadaveric laparoscopy and laparoscopic video demonstrations in gross anatomy: an observation of impact on learning and career choice. *Am Surg*. 2015;81(1):96-100. doi:[10.1177/000313481508100137](https://doi.org/10.1177/000313481508100137)
265. Saigal P, Takemura Y, Nishiue T, Fetters MD. Factors considered by medical students when formulating their specialty preferences in Japan: findings from a qualitative study. *BMC Med Educ*. 2007;7:31. doi:[10.1186/1472-6920-7-31](https://doi.org/10.1186/1472-6920-7-31)
266. Sammann A, Tendick F, Ward D, Zaid H, O'Sullivan P, Ascher N. A surgical skills elective to expose preclinical medical students to surgery. *J Surg Res*. 2007;142(2):287-294. doi:[10.1016/j.jss.2007.03.034](https://doi.org/10.1016/j.jss.2007.03.034)
267. Sanfey HA, Saalwachter-Schulman AR, Nyhof-Young JM, Eidelson B, Mann BD. Influences on medical student career choice: gender or generation? *Arch Surg*. 2006;141(11):1086-1094; discussion 1094. doi:[10.1001/archsurg.141.11.1086](https://doi.org/10.1001/archsurg.141.11.1086)
268. Schnuth RL, Vasilenko P, Mavis B, Marshall J. What influences medical students to pursue careers in obstetrics and gynecology? *Am J Obstet Gynecol*. 2003;189(3):639-643. doi:[10.1067/s0002-9378\(03\)00886-x](https://doi.org/10.1067/s0002-9378(03)00886-x)

269. Schwartz MD, Linzer M, Babbott D, Divine GW, Broadhead WE. The impact of an ambulatory rotation on medical student interest in internal medicine. The Society of General Internal Medicine Task Force on Career Choice in Internal Medicine. *J Gen Intern Med*. 1995;10(10):542-549. doi:[10.1007/BF02640362](https://doi.org/10.1007/BF02640362)
270. Schwartz MD, Durning S, Linzer M, Hauer KE. Changes in medical students' views of internal medicine careers from 1990 to 2007. *Arch Intern Med*. 2011;171(8):744-749. doi:[10.1001/archinternmed.2011.139](https://doi.org/10.1001/archinternmed.2011.139)
271. Scott I, Gowans MC, Wright B, Brenneis F. Why medical students switch careers: changing course during the preclinical years of medical school. *Can Fam Physician*. 2007;53(1):95, 95:e.1-5, 94.
272. Scott I, Wright B, Brenneis F, Brett-Maclean P, McCaffrey L. Why would I choose a career in family medicine?: Reflections of medical students at 3 universities. *Can Fam Physician*. 2007;53(11):1956-1957.
273. Sedaghat N, Mondy J, Eslick GD, Cox MR. Exposure of medical students to surgery: the Nepean summer vacation surgical program. *J Surg Educ*. 2012;69(5):580-587. doi:[10.1016/j.jsurg.2012.06.003](https://doi.org/10.1016/j.jsurg.2012.06.003)
274. Seo HS, Eom YH, Kim MK, Kim YM, Song BJ, Song KY. A one-day surgical-skill training course for medical students' improved surgical skills and increased interest in surgery as a career. *BMC Med Educ*. 2017;17(1):265. doi:[10.1186/s12909-017-1106-x](https://doi.org/10.1186/s12909-017-1106-x)
275. Seow LSE, Chua BY, Mahendran R, et al. Psychiatry as a career choice among medical students: a cross-sectional study examining school-related and non-school factors. *BMJ Open*. 2018;8(8):e022201. doi:[10.1136/bmjopen-2018-022201](https://doi.org/10.1136/bmjopen-2018-022201)
276. Shaikh M, Shaygi B, Asadi H, et al. The Introduction of an Undergraduate Interventional Radiology (IR) Curriculum: Impact on Medical Student Knowledge and Interest in IR. *Cardiovasc Intervent Radiol*. 2016;39(4):514-521. doi:[10.1007/s00270-015-1215-z](https://doi.org/10.1007/s00270-015-1215-z)
277. Shelton J, Obregon M, Luo J, Feldman-Schultz O, MacDowell M. Factors Influencing a Medical Student's Decision to Pursue Surgery as a Career. *World J Surg*. 2019;43(12):2986-2993. doi:[10.1007/s00268-019-05167-9](https://doi.org/10.1007/s00268-019-05167-9)
278. Shen Y, Dong H, Fan X, et al. What can the medical education do for eliminating stigma and discrimination associated with mental illness among future doctors? effect of clerkship training on chinese students' attitudes. *Int J Psychiatry Med*. 2014;47(3):241-254. doi:[10.2190/PM.47.3.e](https://doi.org/10.2190/PM.47.3.e)
279. Shepherd SM, Dudewicz DM, Hindo WA. Immediate and long-term effects of a sophomore radiology elective. *Acad Radiol*. 2003;10(7):786-793. doi:[10.1016/s1076-6332\(03\)80124-1](https://doi.org/10.1016/s1076-6332(03)80124-1)
280. Shipper ES, Miller SE, Hasty BN, Merrell SB, Lin DT, Lau JN. Evaluation of a technical and nontechnical skills curriculum for students entering surgery. *J Surg Res*. 2017;219:92-97. doi:[10.1016/j.jss.2017.05.105](https://doi.org/10.1016/j.jss.2017.05.105)
281. Shipper ES, Miller SE, Hasty BN, et al. Determining the educational value of a technical and nontechnical skills medical student curriculum. *J Surg Res*. 2018;225:157-165. doi:[10.1016/j.jss.2018.01.002](https://doi.org/10.1016/j.jss.2018.01.002)
282. Shrestha B, Pokhrel YR, Butterworth K. Determinants of Postgraduate Students' Choices of Speciality. *JNMA J Nepal Med Assoc*. 2016;54(201):1-7. doi: [10.31729/jnma.2808](https://doi.org/10.31729/jnma.2808)
283. Siasakos D, Timmons C, Hogg F, Epee M, Marshall L, Draycott T. Evaluation of a strategy to improve undergraduate experience in obstetrics and gynaecology. *Med Educ*. 2009;43(7):669-673. doi:[10.1111/j.1365-2923.2009.03394.x](https://doi.org/10.1111/j.1365-2923.2009.03394.x)
284. Simões RL, Dorigatti AE, Silveira HJV, Calderan TRA, Rizoli S, Fraga GP. Trauma Leagues-A Novel Option to Attract Medical Students to a Surgical Career. *World J Surg*. 2018;42(2):549-556. doi:[10.1007/s00268-017-4190-5](https://doi.org/10.1007/s00268-017-4190-5)
285. Sinclair HK, Ritchie LD, Lee AJ. A future career in general practice? A longitudinal study of medical students and pre-registration house officers. *European Journal of General Practice*. 2006;12(3):120-127. doi:[10.1080/13814780600780833](https://doi.org/10.1080/13814780600780833)
286. Singh A, Alberti H. Why UK medical students change career preferences: an interview study. *Perspect Med Educ*. 2021;10(1):41-49. doi:[10.1007/s40037-020-00636-7](https://doi.org/10.1007/s40037-020-00636-7)
287. Skokauskas N, Doody B, Gallagher L, et al. Problem-based learning in child and adolescent psychiatry at Trinity College, Dublin, Ireland. *Acad Psychiatry*. 2012;36(4):335-339. doi:[10.1176/appi.ap.10120165](https://doi.org/10.1176/appi.ap.10120165)
288. Skorus U, Karpińska I, Kominko A, Romaniszyn M. Why do Polish medical students resign from pursuing surgical careers? A survey study. *Pol Przegl Chir*. 2020;92(2):12-21. doi:[10.5604/01.3001.0013.7955](https://doi.org/10.5604/01.3001.0013.7955)
289. Smith V, Bethune C, Hurley KF. Examining Medical Student Specialty Choice Through a Gender Lens: An Orientational Qualitative Study. *Teach Learn Med*. 2018;30(1):33-44. doi:[10.1080/10401334.2017.1306447](https://doi.org/10.1080/10401334.2017.1306447)
290. Sobral DT. Influences on choice of surgery as a career: a study of consecutive cohorts in a medical school. *Med Educ*. 2006;40(6):522-529. doi:[10.1111/j.1365-2929.2006.02482.x](https://doi.org/10.1111/j.1365-2929.2006.02482.x)
291. Solomon DJ, DiPette DJ. Specialty choice among students entering the fourth year of medical school. *Am J Med Sci*. 1994;308(5):284-288. doi:[10.1097/00000441-199411000-00005](https://doi.org/10.1097/00000441-199411000-00005)
292. Sorouri K, Khan S, Bowden S, Searle S, Carr L, Simpson JS. The Glaring Gender Bias in the Operating Room: A Qualitative Study of Factors Influencing Career Selection for First-Year Medical Students. *J Surg Educ*. 2021;78(5):1516-1523. doi:[10.1016/j.jsurg.2021.01.014](https://doi.org/10.1016/j.jsurg.2021.01.014)

293. Sozio SM, Pivert KA, Shah HH, et al. Increasing Medical Student Interest in Nephrology. *Am J Nephrol*. 2019;50(1):4-10. doi:[10.1159/000501058](https://doi.org/10.1159/000501058)
294. Spiers H, Enayati H, Moussa R, et al. Augmenting ENT surgery outside the medical school curriculum: the role of a 1-day otolaryngology course. *J Laryngol Otol*. 2019;133(4):269-274. doi:[10.1017/S0022215119000331](https://doi.org/10.1017/S0022215119000331)
295. Sripa P, Thepwongsa I, Muthukumar R. Factors associated with the entry to general practice training: A multicentre study. *Med Teach*. 2020;42(12):1394-1400. doi:[10.1080/0142159X.2020.1811846](https://doi.org/10.1080/0142159X.2020.1811846)
296. Stahn B, Harendza S. Role models play the greatest role - a qualitative study on reasons for choosing postgraduate training at a university hospital. *GMS Z Med Ausbild*. 2014;31(4):Doc45. doi:[10.3205/zma000937](https://doi.org/10.3205/zma000937)
297. Stearns J, Glasser M, Miller B, Flach D, Cowen J. A longitudinal ambulatory care clerkship: graduates' reports on the effect on specialty choice and preparation for residency. *Acad Med*. 1993;68(10 Suppl):S37-39. doi:[10.1097/00001888-199310000-00039](https://doi.org/10.1097/00001888-199310000-00039)
298. Stratton TD, McLaughlin MA, Witte FM, Fosson SE, Nora LM. Does students' exposure to gender discrimination and sexual harassment in medical school affect specialty choice and residency program selection? *Acad Med*. 2005;80(4):400-408. doi:[10.1097/00001888-200504000-00020](https://doi.org/10.1097/00001888-200504000-00020)
299. Strelzow J, Petretta R, Broekhuysen HM. Factors affecting orthopedic residency selection: a cross-sectional survey. *Can J Surg*. 2017;60(3):186-191. doi:[10.1503/cjs.014915](https://doi.org/10.1503/cjs.014915)
300. Süß M, Benson S, Herbstreit S, et al. [Where did all the men in child and adolescent psychiatry and psychotherapy go? The influence of gender on the choice of specialization]. *Z Kinder Jugendpsychiatr Psychother*. 2020;48(3):194-203. doi:[10.1024/1422-4917/a000692](https://doi.org/10.1024/1422-4917/a000692)
301. Sutton PA, Mason J, Vimalachandran D, McNally S. Attitudes, motivators, and barriers to a career in surgery: a national study of U.K. undergraduate medical students. *J Surg Educ*. 2014;71(5):662-667. doi:[10.1016/j.jsurg.2014.03.005](https://doi.org/10.1016/j.jsurg.2014.03.005)
302. Talbot J, Ward A. Alternative Curricular Options in Rural Networks (ACORNS): impact of early rural clinical exposure in the University of West Australia medical course. *Aust J Rural Health*. 2000;8(1):17-21. doi:[10.1046/j.1440-1584.2000.81237.x](https://doi.org/10.1046/j.1440-1584.2000.81237.x)
303. Teclessou JN, Dabouda A, Akakpo S, et al. Factors influencing student's specialty choices in Lomé faculty of medicine (Togo). *BMC Med Educ*. 2021;21(1):615. doi:[10.1186/s12909-021-03063-2](https://doi.org/10.1186/s12909-021-03063-2)
304. Tesche LJ, Feins RH, Dedmon MM, et al. Simulation experience enhances medical students' interest in cardiothoracic surgery. *Ann Thorac Surg*. 2010;90(6):1967-1973; discussion 1973-1974. doi:[10.1016/j.athoracsur.2010.06.117](https://doi.org/10.1016/j.athoracsur.2010.06.117)
305. Thistlethwaite J, Kidd MR, Leeder S, Shaw T, Corcoran K. Enhancing the choice of general practice as a career. *Aust Fam Physician*. 2008;37(11):964-968.
306. Thivierge-Southidara M, Courchesne M, Bonneau S, Carrier M, Henri M. Effect of a surgical observership on the perceptions and career choices of preclinical medical students: a mixed-methods study. *Can J Surg*. 2022;65(1):E1-E8. doi:[10.1503/cjs.019419](https://doi.org/10.1503/cjs.019419)
307. Tolhurst H, Stewart M. Becoming a GP—a qualitative study of the career interests of medical students. *Aust Fam Physician*. 2005;34(3):204-206.
308. Torrible SJ, Diachun LL, Rolfson DB, Dumbrell AC, Hogan DB. Improving recruitment into geriatric medicine in Canada: Findings and recommendations from the geriatric recruitment issues study. *J Am Geriatr Soc*. 2006;54(9):1453-1462. doi:[10.1111/j.1532-5415.2006.00884.x](https://doi.org/10.1111/j.1532-5415.2006.00884.x)
309. Turner G, Lambert TW, Goldacre MJ, Barlow D. Career choices for obstetrics and gynaecology: national surveys of graduates of 1974-2002 from UK medical schools. *BJOG*. 2006;113(3):350-356. doi:[10.1111/j.1471-0528.2006.00848.x](https://doi.org/10.1111/j.1471-0528.2006.00848.x)
310. Urbina C, Solan B, Counsellor A, Mines J, Serna L, Kalishman S. "Where have all the students gone?" Retaining medical school graduates through educational innovations. *Educ Health (Abingdon)*. 2003;16(3):279-285. doi:[10.1080/13576280310001607451](https://doi.org/10.1080/13576280310001607451)
311. Vaidya HJ, Emery AW, Alexander EC, McDonnell AJ, Burford C, Bulsara MK. Clinical specialty training in UK undergraduate medical schools: a retrospective observational study. *BMJ Open*. 2019;9(7):e025403. doi:[10.1136/bmjopen-2018-025403](https://doi.org/10.1136/bmjopen-2018-025403)
312. Vohra A, Ladyshevsky R, Trumble S. Factors that affect general practice as a choice of medical speciality: implications for policy development. *Aust Health Rev*. 2019;43(2):230-237. doi:[10.1071/AH17015](https://doi.org/10.1071/AH17015)
313. Walker NR, Deekonda P, Glasbey JC, et al. Attracting medical students and doctors into surgical training in the UK and Ireland. *Int J Surg*. 2019;67:107-112. doi:[10.1016/j.ijsu.2019.01.007](https://doi.org/10.1016/j.ijsu.2019.01.007)
314. Wendel TM, Godellas CV, Prinz RA. Are there gender differences in choosing a surgical career? *Surgery*. 2003;134(4):591-596; discussion 596-598. doi:[10.1016/s0039-6060\(03\)00304-0](https://doi.org/10.1016/s0039-6060(03)00304-0)
315. Werwick K, Spura A, Gottschalk M, et al. [Creating Enthusiasm for Surgery - Perceptions of the Impact of Undergraduate Practical Education (Clerkship) for Occupational Choices]. *Zentralbl Chir*. 2017;142(6):550-559. doi:[10.1055/s-0043-114732](https://doi.org/10.1055/s-0043-114732)
316. Whitaker J, Hartley B, Zamora R, Duvall D, Wolf V. Residency Selection Preferences and Orthopaedic Career Perceptions: A Notable Mismatch. *Clin Orthop Relat Res*. 2020;478(7):1515-1525. doi:[10.1097/CORR.0000000000001161](https://doi.org/10.1097/CORR.0000000000001161)
317. Whittaker LD, Estes NC, Ash J, Meyer LE. The value of resident teaching to improve student perceptions of surgery clerkships and surgical career choices. *Am J Surg*. 2006;191(3):320-324. doi:[10.1016/j.amjsurg.2005.10.029](https://doi.org/10.1016/j.amjsurg.2005.10.029)

318. Wiesenfeld L, Abbey S, Takahashi SG, Abrahams C. Choosing psychiatry as a career: motivators and deterrents at a critical decision-making juncture. *Can J Psychiatry*. 2014;59(8):450-454. doi:[10.1177/070674371405900808](https://doi.org/10.1177/070674371405900808)
319. Williamson M, Gormley A, Bills J, Farry P. The new rural health curriculum at Dunedin School of Medicine: how has it influenced the attitudes of medical students to a career in rural general practice? *N Z Med J*. 2003;116(1179):U537.
320. Wimsatt LA, Cooke JM, Biggs WS, Heidelbaugh JJ. Institution-Specific Factors Associated With Family Medicine Residency Match Rates. *Teach Learn Med*. 2016;28(3):269-278. doi:[10.1080/10401334.2016.1159565](https://doi.org/10.1080/10401334.2016.1159565)
321. Woodworth PA, Chang FC, Helmer SD. Debt and other influences on career choices among surgical and primary care residents in a community-based hospital system. *Am J Surg*. 2000;180(6):570-575; discussion 575-576. doi:[10.1016/s0002-9610\(00\)00543-2](https://doi.org/10.1016/s0002-9610(00)00543-2)
322. Woolley T, Larkins S, Sen Gupta T. Career choices of the first seven cohorts of JCU MBBS graduates: producing generalists for regional, rural and remote northern Australia. *Rural Remote Health*. 2019;19(2):4438. doi:[10.22605/RRH4438](https://doi.org/10.22605/RRH4438)
323. Wright S, Wong A, Newill C. The impact of role models on medical students. *J Gen Intern Med*. 1997;12(1):53-56. doi:[10.1046/j.1525-1497.1997.12109.x](https://doi.org/10.1046/j.1525-1497.1997.12109.x)
324. Wu DJ, Greenberg PB. A Self-Directed Preclinical Course in Ophthalmic Surgery. *J Surg Educ*. 2016;73(3):370-374. doi:[10.1016/j.jsurg.2015.11.005](https://doi.org/10.1016/j.jsurg.2015.11.005)
325. Xu G, Hojat M, Brigham TP, Veloski JJ. Factors associated with changing levels of interest in primary care during medical school. *Acad Med*. 1999;74(9):1011-1015. doi:[10.1097/00001888-199909000-00015](https://doi.org/10.1097/00001888-199909000-00015)
326. Xu G, Veloski JJ, Barzansky B. Comparisons between older and usual-aged medical school graduates on the factors influencing their choices of primary care specialties. *Acad Med*. 1997;72(11):1003-1007. doi:[10.1097/00001888-199711000-00020](https://doi.org/10.1097/00001888-199711000-00020)
327. Yang H, Wilson-Yang K, Raymer K. Recruitment in anaesthesia: results of two national surveys. *Can J Anaesth*. 1994;41(7):621-627. doi:[10.1007/BF03010003](https://doi.org/10.1007/BF03010003)
328. Yong JJ, Migliori ME, Greenberg PB. A novel preclinical course in ophthalmology and ophthalmic virtual surgery. *Med Health R I*. 2012;95(11):345-348.
329. Yoon JD, Ham SA, Reddy ST, Curlin FA. Role Models' Influence on Specialty Choice for Residency Training: A National Longitudinal Study. *J Grad Med Educ*. 2018;10(2):149-154. doi:[10.4300/JGME-D-17-00063.1](https://doi.org/10.4300/JGME-D-17-00063.1)
330. Yu TCW, Wheeler BR, Hill AG. Effectiveness of standardized clerkship teaching across multiple sites. *J Surg Res*. 2011;168(1):e17-23. doi:[10.1016/j.jss.2009.09.035](https://doi.org/10.1016/j.jss.2009.09.035)
331. Zhang JF, Zilundu PLM, Zhou L, Guo GQ. Supplementary Regional Anatomy Teaching by Surgeons Enhances Medical Students Mastery of Anatomical Knowledge and Positively Impacts Their Choice of Future Career. *J Surg Educ*. 2020;77(5):1113-1120. doi:[10.1016/j.jsurg.2020.03.016](https://doi.org/10.1016/j.jsurg.2020.03.016)
332. Ziegler T, Adibfar A, Abbasian A, Jiang SX, Rutka JT, Gawad N. Propagating the "SEAD": Exploring the Value of an Overnight Call Shift in the Surgical Exploration and Discovery (SEAD) Program. *J Surg Educ*. 2020;77(1):104-114. doi:[10.1016/j.jsurg.2019.08.011](https://doi.org/10.1016/j.jsurg.2019.08.011)
333. Zuckerman SL, Mistry AM, Hanif R, et al. Neurosurgery Elective for Preclinical Medical Students: Early Exposure and Changing Attitudes. *World Neurosurg*. 2016;86:120-126. doi:[10.1016/j.wneu.2015.08.081](https://doi.org/10.1016/j.wneu.2015.08.081)
334. Zuzuáregui JRP, Hohler AD. Comprehensive Opportunities for Research and Teaching Experience (CORTEX): A mentorship program. *Neurology*. 2015;84(23):2372-2376. doi:[10.1212/WNL.0000000000001663](https://doi.org/10.1212/WNL.0000000000001663)

**Additional file 3: Characteristics of the included studies**

| Author(s)                         | Year | Location | Study-design                                                               | Sample size (response rate)                                                                          | Length of data collection | Study population                                                                     | Intracurricular factor(s) studied/mentioned |
|-----------------------------------|------|----------|----------------------------------------------------------------------------|------------------------------------------------------------------------------------------------------|---------------------------|--------------------------------------------------------------------------------------|---------------------------------------------|
| Abendroth et al. <sup>1*</sup>    | 2014 | Europe   | Cross-sectional (quantitative)                                             | 45 of 97 (46%)                                                                                       | 5 years                   | Graduates; Residents                                                                 | 4, 8, 11                                    |
| Admani et al. <sup>2</sup>        | 2014 | America  | Cross-sectional (quantitative)                                             | 115 of 162 (71%)                                                                                     | /                         | Pediatrics Dermatologists                                                            | 1, 4                                        |
| Ahsin and Saeed <sup>3</sup>      | 2016 | Asia     | Cross-sectional (quantitative)                                             | /                                                                                                    | /                         | Medical students (2 <sup>nd</sup> to final year of study)                            | 1                                           |
| Al Salehi et al. <sup>4</sup>     | 2019 | Asia     | Cross-sectional (quantitative)                                             | 145 of 150 (97%)                                                                                     | /                         | Medical students                                                                     | 1, 7, 8, 11                                 |
| Al-Asnag and Jan <sup>5</sup>     | 2002 | Asia     | Longitudinal (quantitative)                                                | 195 of 195 (100%)                                                                                    | 3 years                   | Medical students                                                                     | 1                                           |
| Al-Jaeed et al. <sup>6</sup>      | 2021 | Asia     | Cross-sectional (quantitative)                                             | 566 of 601 (94%)                                                                                     | /                         | Medical students (2 <sup>nd</sup> to 6 <sup>th</sup> year of study)                  | 4                                           |
| Al-Mendalawi <sup>7</sup>         | 2010 | Asia     | Cross-sectional (quantitative)                                             | 108 of 118 (92%)                                                                                     | /                         | Medical students (last year of study)                                                | 7                                           |
| Al-Nuaimi et al. <sup>8</sup>     | 2010 | Europe   | Cross-sectional (quantitative)                                             | 395 of 1 988 (20%)                                                                                   | /                         | Medical students                                                                     | 1, 3, 7, 12                                 |
| Alavi et al. <sup>9</sup>         | 2019 | America  | Cross-sectional (qualitative)                                              | /                                                                                                    | 2 years                   | Medical students (4 <sup>th</sup> year of study)                                     | 1, 2, 4, 8                                  |
| Albert et al. <sup>10</sup>       | 2016 | America  | Cross-sectional (qualitative)                                              | /                                                                                                    | /                         | Medical students; Graduates, Residents, Specialists                                  | 1, 4, 11                                    |
| Alberti et al. <sup>11</sup>      | 2017 | Europe   | Cross-sectional (quantitative)                                             | 31 of 31 (100%)                                                                                      | /                         | Directors of teaching                                                                | 1, 2, 6, 8, 11                              |
| Alkatout et al. <sup>12</sup>     | 2020 | Europe   | Application observation cross-sectional - workshop/congress (quantitative) | 143 of 176 (81%)                                                                                     | /                         | Medical students (2 <sup>nd</sup> year of study)                                     | 6                                           |
| Amalba et al. <sup>13</sup>       | 2016 | Africa   | Cross-sectional (quantitative + qualitative)                               | 134 of 139 (96%)                                                                                     | /                         | Medical students (3 <sup>rd</sup> 4 <sup>th</sup> year of study)                     | 2, 7, 11                                    |
| Ambrozy et al. <sup>14</sup>      | 1997 | America  | Cross-sectional (quantitative)                                             | 177 of 210 (84%)                                                                                     | /                         | Selected role models                                                                 | 7                                           |
| Andlauer et al. <sup>15</sup>     | 2012 | Europe   | Cross-sectional (quantitative)                                             | 145 of 430 (34%)                                                                                     | /                         | Medical students (last year of study)                                                | 1, 3, 8                                     |
| Appleton et al. <sup>16</sup>     | 2017 | Europe   | Cross-sectional (qualitative)                                              | /                                                                                                    | /                         | Residents (psychiatry)                                                               | 1, 4, 5, 8, 11, 13                          |
| Are et al. <sup>17</sup>          | 2018 | America  | Longitudinal (quantitative)                                                | 165 of 249 (66%)                                                                                     | 4 years                   | Medical students                                                                     | 1, 8                                        |
| Arleo et al. <sup>18</sup>        | 2016 | America  | Cross-sectional (quantitative)                                             | 1 219 of 18 078 (7%)                                                                                 | /                         | Medical students (4 <sup>th</sup> year of study)                                     | 1, 7, 8                                     |
| Asaad et al. <sup>19</sup>        | 2020 | Asia     | Cross-sectional (quantitative)                                             | 561 of 644 (87%)                                                                                     | /                         | Medical students (2 <sup>nd</sup> , 4 <sup>th</sup> , 6 <sup>th</sup> year of study) | 4, 11                                       |
| Atalabi et al. <sup>20</sup>      | 2013 | Africa   | Cross-sectional (quantitative)                                             | 249 of 249 (100%)                                                                                    | /                         | Medical students (last 2 years of study)                                             | 1, 4, 8                                     |
| Azizzadeh et al. <sup>21</sup>    | 2003 | America  | Cross-sectional (quantitative)                                             | 111 of 160 (69%)                                                                                     | /                         | Medical students (4 <sup>th</sup> year of study)                                     | 1, 4, 7                                     |
| Balogun and Adebayo <sup>22</sup> | 2019 | Africa   | Cross-sectional (quantitative + qualitative)                               | 256 of 264 (97%)                                                                                     | 2 years                   | Medical students (last year of study)                                                | 1, 8, 9                                     |
| Barat et al. <sup>23</sup>        | 2019 | Europe   | Longitudinal (quantitative)                                                | Year 1: 40 412 of 71 026 (57%);<br>Year 3: 31 466 of 50 477 (63%);<br>Year 5: 24 970 of 45 071 (55%) | 41 years                  | Graduates                                                                            | 1, 8                                        |
| Barber et al. <sup>24</sup>       | 2018 | Europe   | Cross-sectional (quantitative + qualitative)                               | 280 of 315 (89%)                                                                                     | /                         | Medical students (5 <sup>th</sup> + 6 <sup>th</sup> year of study)                   | 1, 3, 4, 7, 10, 12, 13                      |

|                             |      |           |                                                                                                             |                                                                                    |         |                                                                               |                |
|-----------------------------|------|-----------|-------------------------------------------------------------------------------------------------------------|------------------------------------------------------------------------------------|---------|-------------------------------------------------------------------------------|----------------|
| Barron et al. <sup>25</sup> | 2012 | America   | Interventional (workshop) (quantitative + qualitative)                                                      | IG: 246 of 914 (27%); KCG: 109 of 1098 (10%)                                       | /       | Medical students; Specialists (psychiatry)                                    | 6              |
| Bauer et al. <sup>26</sup>  | 2015 | Europe    | Application observation longitudinal - workshop (quantitative)                                              | 54 of 54 (100%)                                                                    | /       | Medical students (3 <sup>rd</sup> – 5 <sup>th</sup> year of study)            | 6              |
| Bédard et al. <sup>27</sup> | 2006 | Europe    | Longitudinal (quantitative)                                                                                 | 1 <sup>st</sup> Survey: 485 of 500 (97%); 2 <sup>nd</sup> Survey: 353 of 500 (71%) | 2 years | Medical students                                                              | 1, 7, 9        |
| Beier et al. <sup>28</sup>  | 2015 | Europe    | Application observation cross-sectional – microsurgical beginner-course for medical students (quantitative) | 39 of 44 (89%)                                                                     | /       | Medical students                                                              | 6              |
| Berger et al. <sup>29</sup> | 2017 | America   | Longitudinal (quantitative)                                                                                 | M1: 245 (78%); M2: 270 (86%); M3: 295 (94%) of 314                                 | 3 years | Medical students                                                              | 4              |
| Bhat et al. <sup>30</sup>   | 2012 | Asia      | Cross-sectional (quantitative)                                                                              | 250 of 250 (100%)                                                                  | /       | Residents (1 <sup>st</sup> + 2 <sup>nd</sup> year); /Students practical year  | 8              |
| Bhutta et al. <sup>31</sup> | 2016 | Europe    | Cross-sectional (quantitative + qualitative)                                                                | 81 of 93 (87%)                                                                     | /       | Medical students; Residents                                                   | 1, 7           |
| Bien et al. <sup>32</sup>   | 2019 | Europe    | Cross-sectional (quantitative)                                                                              | 361 of 509 (71%)                                                                   | /       | Medical students (4 <sup>th</sup> + 5 <sup>th</sup> year of study)            | 1, 7, 11, 13   |
| Blatt et al. <sup>33</sup>  | 2022 | America   | Application observation cross-sectional - Summer Genetics Scholar Program (quantitative)                    | 55 of 125 (44%)                                                                    | /       | Medical students                                                              | 6              |
| Blue et al. <sup>34</sup>   | 1996 | America   | Cross-sectional (quantitative)                                                                              | 187 of 516 (36%)                                                                   | /       | General practitioners; Internists; Pediatricians                              | 1, 4, 6, 7, 11 |
| Bobo et al. <sup>35</sup>   | 2009 | America   | Cross-sectional + longitudinal (quantitative)                                                               | 647 of 674 (96%)                                                                   | 5 years | Medical students (3 <sup>rd</sup> year of study)                              | 1              |
| Bolger et al. <sup>36</sup> | 2015 | Europe    | Cross-sectional (quantitative)                                                                              | 595 of 615 (97%)                                                                   | /       | Medical students (3 <sup>rd</sup> - 5 <sup>th</sup> year of study); Graduates | 4              |
| Bonura et al. <sup>37</sup> | 2016 | America   | Cross-sectional (quantitative)                                                                              | 590 of / (/)                                                                       | /       | Residents (internal medicine)                                                 | 1, 4, 6, 8, 12 |
| Borges et al. <sup>38</sup> | 2009 | America   | Cross-sectional (quantitative)                                                                              | 356 of 494 (72%)                                                                   | 5 years | Medical students (4 <sup>th</sup> year of study)                              | 1, 4, 8, 12    |
| Boyd et al. <sup>39</sup>   | 2009 | America   | Cross-sectional (quantitative)                                                                              | 13 440 of 31 686 (42%)                                                             | /       | Graduates                                                                     | 4              |
| Boyle et al. <sup>40</sup>  | 2014 | Australia | Cross-sectional (quantitative)                                                                              | 711 of / (79%)                                                                     | 5 years | Medical students (last year of study)                                         | 1, 7, 8        |
| Briggs et al. <sup>41</sup> | 2006 | Europe    | Cross-sectional (quantitative)                                                                              | 1 036 of 1 902 (54%)                                                               | /       | Physicians                                                                    | 1, 2, 8        |
| Brooks et al. <sup>42</sup> | 2016 | America   | Application observation cross-sectional - Summer Angevine Pathology Course (quantitative + qualitative)     | 20 of 31 65%)                                                                      | /       | Specialists                                                                   | 6              |
| Brown et al. <sup>43</sup>  | 2015 | Europe    | Application observation cross-sectional -                                                                   | 145 of 214 (68%) + 13 Focus-groups                                                 | /       | Medical students (1 <sup>st</sup> + 2 <sup>nd</sup> year of study)            | 1, 8           |

|                                        |      |           |                                                                                                                   |                                                                                         |           |                                                                                      |                   |
|----------------------------------------|------|-----------|-------------------------------------------------------------------------------------------------------------------|-----------------------------------------------------------------------------------------|-----------|--------------------------------------------------------------------------------------|-------------------|
|                                        |      |           | Learning Opportunities in the Clinical Setting (LOCS) (quantitative + qualitative)                                |                                                                                         |           |                                                                                      |                   |
| Buddeberg-Fischer et al. <sup>44</sup> | 2002 | Europe    | Cross-sectional (qualitative)                                                                                     | /                                                                                       | /         | State Exam Candidates                                                                | 1, 2, 3, 4, 9, 11 |
| Burack et al. <sup>45</sup>            | 1997 | America   | Cross-sectional (quantitative + qualitative)                                                                      | 133 of 157 (95%) + 47 interviews                                                        | /         | Medical students (last year of study)                                                | 4, 7              |
| Calligaro and Dougherty <sup>46</sup>  | 2006 | America   | Cross-sectional (quantitative)                                                                                    | Group 1: 80 of 174 (46%); Group 2: 135 of 174 (78%); Group 3: 78 of / (/)               | /         | Physicians; Specialists/ Residents; Medical students (4 <sup>th</sup> year of study) | 1, 4              |
| Campos-Outcalt et al. <sup>47</sup>    | 2004 | America   | Cross-sectional (quantitative)                                                                                    | 1 457 of 2 985 (52%)                                                                    | /         | Graduates (with application of general medicine)                                     | 1, 7, 8, 13       |
| Carmichael et al. <sup>48</sup>        | 2020 | America   | Application observation cross-sectional - Bedside Anatomy (quantitative + qualitative)                            | 83 of 185 (45%)                                                                         | /         | Medical students (preclinical years)                                                 | 6, 11             |
| Celenza et al. <sup>49</sup>           | 2012 | Australia | Cross-sectional (quantitative)                                                                                    | 216 of 280 (77%)                                                                        | /         | Specialists; Residents; Medical students                                             | 1, 4              |
| Chan et al. <sup>50</sup>              | 2016 | Africa    | Cross-sectional (quantitative + qualitative)                                                                      | 75 von 75 (100%)                                                                        | /         | Medical students (last year of study)                                                | 1, 4, 7           |
| Chan et al. <sup>51</sup>              | 2020 | Asia      | Cross-sectional (qualitative)                                                                                     | /                                                                                       | /         | Medical students (2 <sup>nd</sup> – 5 <sup>th</sup> year of study)                   | 1, 6, 8, 13       |
| Chang et al. <sup>52</sup>             | 2006 | Asia      | Cross-sectional (quantitative)                                                                                    | 283 of 500 (57%)                                                                        | /         | Medical students (5 <sup>th</sup> , 6 <sup>th</sup> , 7 <sup>th</sup> year of study) | 7                 |
| Chang et al. <sup>53</sup>             | 2019 | America   | Application observation cross-sectional - Domestic One-Week Service Learning Program (quantitative + qualitative) | 48 of 84 (57%) + 7 diary entries                                                        | /         | Medical students                                                                     | 6                 |
| Chapman et al. <sup>54</sup>           | 1999 | Europe    | Application observation longitudinal - Course in Emergency Medical Services (EMS) (quantitative)                  | pre: 190 of 210 (91%); post: 194 of 210 (92%)                                           | 3,5 years | Medical students (1 <sup>st</sup> + 2 <sup>nd</sup> year of study)                   | 6                 |
| Chaudhuri et al. <sup>55</sup>         | 2013 | Europe    | Cross-sectional (quantitative + qualitative)                                                                      | Group 1: 2 315 of 6 223 (37%); Group 2: 728 of 3 165 (23%); Group 3: 212 of 1 178 (18%) | /         | Specialists; Residents; students in practical year                                   | 7                 |
| Cheng et al. <sup>56</sup>             | 2017 | America   | Application observation cross-sectional - Cambridge Integrated Clerkship (quantitative + qualitative)             | 30 of 100 (30%)                                                                         | /         | Medical students                                                                     | 1                 |
| Cherry-Bukowiec et al. <sup>57</sup>   | 2015 | America   | Application observation longitudinal - Trauma-Burn                                                                | /                                                                                       | 2 years   | Medical students (3 <sup>rd</sup> year of study)                                     | 1                 |

|                                            |      |               |                                                                                                                                 |                                                            |         |                                                                    |                       |
|--------------------------------------------|------|---------------|---------------------------------------------------------------------------------------------------------------------------------|------------------------------------------------------------|---------|--------------------------------------------------------------------|-----------------------|
|                                            |      |               | Acute Care Surgery Rotation (qualitative)                                                                                       |                                                            |         |                                                                    |                       |
| Chew et al. <sup>58</sup>                  | 2018 | Asia          | Cross-sectional (quantitative)                                                                                                  | 800 of 1 300 (62%)                                         | /       | Medical students (1 <sup>st</sup> – 5 <sup>th</sup> year of study) | 1                     |
| Chew et al. <sup>59</sup>                  | 2011 | Asia          | Cross-sectional (quantitative)                                                                                                  | 402 of 524 (77%)                                           | /       | Medical students (4 <sup>th</sup> + 5 <sup>th</sup> year of study) | 1, 3, 8, 11           |
| Chung et al. <sup>60</sup>                 | 2016 | Europe        | Cross-sectional (quantitative + qualitative)                                                                                    | 121 of 285 (42%)                                           | /       | Medical students (5 <sup>th</sup> year of study)                   | 6, 8                  |
| Cichon and Feldman <sup>61</sup>           | 2013 | America       | Cross-sectional (quantitative)                                                                                                  | Residents: 72 v of 127 (57%);<br>Directors: 35 of 50 (70%) | /       | Residents;<br>Directors                                            | 1, 4, 6               |
| Clayton et al. <sup>62</sup>               | 2009 | Europe        | Cross-sectional (quantitative)                                                                                                  | 311 of 709 (44%)                                           | /       | Dermatologists                                                     | 1, 5, 11              |
| Clayton and Trotter <sup>63</sup>          | 2013 | America       | Cross-sectional (quantitative)                                                                                                  | 155 of 897 (17%)                                           | /       | Medical students (last year of study)                              | 1, 4, 8, 11           |
| Cochran et al. <sup>64</sup>               | 2005 | America       | Cross-sectional (quantitative)                                                                                                  | 408 of / (/)                                               | /       | Medical students (4 <sup>th</sup> year of study)                   | 1, 4                  |
| Codsi et al. <sup>65</sup>                 | 2019 | America       | Cross-sectional (quantitative)                                                                                                  | 121 of 183 (66%)                                           | /       | Medical students (3 <sup>rd</sup> + 4 <sup>th</sup> year of study) | 1, 2, 8, 11           |
| Corbett et al. <sup>66</sup>               | 2002 | America       | Longitudinal (quantitative)                                                                                                     | 350 of 406 (86%)                                           | 7 years | Medical students (2 <sup>nd</sup> year of study)                   | 1                     |
| Correia Lima de Souza et al. <sup>67</sup> | 2015 | Europe        | Cross-sectional (quantitative)                                                                                                  | 1 223 of 1 547 (79%)                                       | /       | Medical students (last year of study)                              | 1, 6, 7               |
| Coyan et al. <sup>68</sup>                 | 2019 | America       | Cross-sectional (quantitative)                                                                                                  | 126 of 579 (22%)                                           | /       | Medical students                                                   | 1, 4, 6, 11           |
| Croghan and Baker <sup>69</sup>            | 2020 | Europe        | Cross-sectional (quantitative + qualitative)                                                                                    | 117 of 580 (20%)                                           | /       | Students in practical year                                         | 1, 2, 7, 8, 9, 11, 13 |
| Cronin et al. <sup>70</sup>                | 2019 | Europe + Asia | Cross-sectional (quantitative + qualitative)                                                                                    | 464 of 1 376 (34%)                                         | /       | Medical students (3 <sup>rd</sup> – 5 <sup>th</sup> year of study) | 7, 9, 14              |
| Dallas et al. <sup>71</sup>                | 2019 | America       | Application observation longitudinal - Neurosurgery Elective for Preclinical Medical Students (quantitative + qualitative)      | 32 of 32 (100%)                                            | /       | Medical students (1 <sup>st</sup> – 3 <sup>rd</sup> year of study) | 6                     |
| Daniels and Kassam <sup>72</sup>           | 2011 | America       | Cross-sectional (qualitative)                                                                                                   | /                                                          | /       | Residents (internal medicine)                                      | 1, 7                  |
| Davis et al. <sup>73</sup>                 | 2010 | Europe        | Interventional - (British Association of Plastic, Reconstructive and Aesthetic Surgeons (BAPRAS) one-day course) (quantitative) | IG: 93 of 121 (77%); CG: 93 of / (/)                       | /       | Medical students                                                   | 6                     |
| Day et al. <sup>74</sup>                   | 2016 | America       | Interventional (Preclinical Elective in Surgery) (quantitative)                                                                 | IG (EP): 18 of 18 (100%); KG (EA): 8 of / (/)              | /       | Medical students (1 <sup>st</sup> + 2 <sup>nd</sup> year of study) | 4, 6, 11              |
| de Cates et al. <sup>75</sup>              | 2019 | Europe        | Cross-sectional (quantitative + qualitative)                                                                                    | 105 of 321 (33%)                                           | 2 years | Medical students                                                   | 1, 2, 6, 7            |
| DeBolle et al. <sup>76</sup>               | 2018 | America       | Application observation cross-sectional - Surgery Interest Group                                                                | / of 106 (/)                                               | /       | Medical students (1 <sup>st</sup> – 4 <sup>th</sup> year of study) | 4, 6                  |

|                                     |      |                    |                                                                                                                        |                                               |           |                                                                              |                |
|-------------------------------------|------|--------------------|------------------------------------------------------------------------------------------------------------------------|-----------------------------------------------|-----------|------------------------------------------------------------------------------|----------------|
|                                     |      |                    | (SCRUBS)<br>(quantitative)                                                                                             |                                               |           |                                                                              |                |
| Deutsch et al. <sup>77</sup>        | 2014 | Europe             | Cross-sectional<br>(quantitative +<br>qualitative)                                                                     | 659 v of 1 027<br>(64%)                       | /         | Medical students                                                             | 1, 6, 7        |
| Deutsch et al. <sup>78</sup>        | 2013 | Europe             | Application<br>observation<br>longitudinal - Short<br>Community-based<br>Family Practice<br>Elective<br>(quantitative) | 133 of 140 (95%)                              | 2 years   | Medical students<br>(1 <sup>st</sup> + 2 <sup>nd</sup> year of<br>study)     | 6, 7           |
| Deutsch et al. <sup>79</sup>        | 2015 | Europe             | Cross-sectional<br>(quantitative)                                                                                      | 659 of 1 027<br>(64%)                         | /         | Medical students                                                             | 1, 6           |
| Dever et al. <sup>80</sup>          | 2001 | Europe             | Longitudinal<br>(quantitative)                                                                                         | 340 of 397 (86%)                              | 11 years  | Medical students                                                             | 12             |
| Dewey and<br>Agostini <sup>81</sup> | 2010 | America            | Cross-sectional<br>(quantitative)                                                                                      | 306 of 306<br>(100%)                          | /         | Medical students<br>(3 <sup>rd</sup> + 4 <sup>th</sup> year of<br>study)     | 1              |
| Dogbey et<br>al. <sup>82</sup>      | 2018 | America            | Cross-sectional<br>(quantitative)                                                                                      | 282 of 433 (74%)                              | /         | Medical students<br>; Residents;<br>Specialists                              | 1, 4           |
| Doucet et al. <sup>83</sup>         | 1999 | America            | Cross-sectional<br>(quantitative)                                                                                      | 155 of 229 (68%)                              | /         | Applicants<br>internal<br>medicine,<br>pediatrics +<br>internal<br>medicine/ | 7              |
| Drolet et al. <sup>84</sup>         | 2014 | America            | Interventional-<br>(Preclinical<br>Elective in<br>Surgery)<br>(quantitative)                                           | IG: 24 von 24<br>(100%); KG: 147<br>von / (/) | 1,5 years | Medical students<br>(1 <sup>st</sup> + 2 <sup>nd</sup> year of<br>study)     | 6              |
| Dunkley<br>et al. <sup>85</sup>     | 2008 | Europe             | Cross-sectional<br>(quantitative+<br>qualitative)                                                                      | 165 of 227 (73%)                              | /         | Residents;<br>Specialists<br>(rheumatology)                                  | 1, 6, 7, 8, 11 |
| Ek et al. <sup>86</sup>             | 2005 | Australia          | Cross-sectional<br>(quantitative)                                                                                      | 251 of 410 (61%)                              | /         | Medical students<br>(last year of<br>study)                                  | 1, 7, 11       |
| Ekenze et<br>al. <sup>87</sup>      | 2013 | Africa             | Cross-sectional<br>(quantitative)                                                                                      | 275 of 391 (70%)                              | /         | Medical students<br>(last year of<br>study)                                  | 1, 11          |
| Ellsbury<br>et al. <sup>88</sup>    | 1996 | America            | Cross-sectional<br>(quantitative +<br>qualitative)                                                                     | 291 of 320 (91%)                              | /         | Medical students<br>(4 <sup>th</sup> year of study)                          | 1, 7           |
| Ellsbury<br>et al. <sup>89</sup>    | 1998 | America            | Cross-sectional<br>(quantitative)                                                                                      | 214 of 305 (70%)                              | /         | Medical students<br>(3 <sup>rd</sup> year of study)                          | 1, 8, 11       |
| Erraji et al. <sup>90</sup>         | 2015 | Africa             | Cross-sectional<br>(quantitative)                                                                                      | 45 of / (/)                                   | /         | Residents<br>(traumatology<br>and orthopedics)                               | 1, 2, 11       |
| Erzurum<br>et al. <sup>91</sup>     | 2000 | America            | Cross-sectional<br>(quantitative)                                                                                      | 76 of 205 (37%)                               | /         | Medical students<br>(3 <sup>rd</sup> + 4 <sup>th</sup> year of<br>study)     | 7              |
| Farooq<br>et al. <sup>92</sup>      | 2014 | Inter-<br>national | Cross-sectional<br>(quantitative)                                                                                      | 2 195 of 9 135<br>(24%)                       | /         | Medical students<br>(last year of<br>study)                                  | 1, 6, 8        |
| Fehlmann et<br>al. <sup>93</sup>    | 2019 | Europe             | Cross-sectional<br>(quantitative)                                                                                      | 1 749 of 3 123<br>(56%)                       | 6 years   | Medical students<br>(last year of<br>study)                                  | 1, 4           |
| Feit <sup>94</sup>                  | 1994 | America            | Cross-sectional<br>(quantitative)                                                                                      | 351 of / (/)                                  | /         | Medical students<br>(1 <sup>st</sup> + 2 <sup>nd</sup> year of<br>study)     | 7              |
| Fereydooni et<br>al. <sup>95</sup>  | 2021 | America            | Cross-sectional<br>(quantitative)                                                                                      | 70 of 73 (96%)                                | /         | Applicants<br>vascular surgery                                               | 1, 4           |
| Firth and<br>Wass <sup>96</sup>     | 2011 | Europe             | Cross-sectional<br>(qualitative)                                                                                       | /                                             | /         | Graduates in<br>foundation year                                              | 1, 9, 11, 13   |
| Fitzgerald et<br>al. <sup>97</sup>  | 2013 | Europe             | Cross-sectional<br>(quantitative +<br>qualitative)                                                                     | 208 of 320 (66%)                              | /         | Graduates                                                                    | 7, 11, 14      |
| Fogarty et<br>al. <sup>98</sup>     | 2003 | America            | Cross-sectional<br>(quantitative)                                                                                      | 562 of 1 128<br>(50%)                         | /         | Graduates                                                                    | 1, 11          |
| Ford <sup>100</sup>                 | 2005 | America            | Cross-sectional<br>(quantitative)                                                                                      | 1 4370 (PBL: 6<br>391; Non-PBL: 7<br>979)     | /         | Graduates;<br>University-<br>Curriculum                                      | 12             |

|                                         |      |         |                                                                                                                    |                                                                                                |          |                                                   |                |
|-----------------------------------------|------|---------|--------------------------------------------------------------------------------------------------------------------|------------------------------------------------------------------------------------------------|----------|---------------------------------------------------|----------------|
| Ford et al. <sup>99</sup>               | 2018 | America | Application observation cross-sectional - Student Continuity of Practice Experience (SCOPE) program (quantitative) | /                                                                                              | /        | Graduates                                         | 12             |
| Foster <sup>101</sup>                   | 1994 | America | Application observation cross-sectional - Alternative Curriculum (quantitative)                                    | 37 of 44 (85%)                                                                                 | /        | Medical students                                  | 12             |
| Frey et al. <sup>102</sup>              | 2021 | America | Application observation longitudinal - Neuro Day (quantitative)                                                    | pre: 50 of 103 (49%); post: 103 of 103 (100%)                                                  | /        | Medical students (1 <sup>st</sup> year of study)  | 6              |
| Gami and Howe <sup>103</sup>            | 2020 | Europe  | Cross-sectional (quantitative + qualitative)                                                                       | 131 of 490 (27%)                                                                               | /        | Medical students                                  | 1, 4, 5, 7, 11 |
| Gawad et al. <sup>104</sup>             | 2013 | America | Application observation longitudinal - Surgical Exploration and Discovery (SEAD) Program (quantitative)            | 19 of 19 (100%)                                                                                | /        | Medical students (1 <sup>st</sup> year of study)  | 6              |
| Gebhard and Müller-Hilke <sup>105</sup> | 2019 | Europe  | Cross-sectional (quantitative)                                                                                     | 421 of 1 143 (31%)                                                                             | /        | Medical students                                  | 1, 8, 11       |
| Glasbey et al. <sup>106</sup>           | 2017 | Europe  | Application observation longitudinal - Foundation Skills in Surgery (FSS) (quantitative)                           | 529 of 570 (93%)                                                                               | /        | Medical students; Residents; Specialists          | 6              |
| Goldacre et al. <sup>107</sup>          | 2013 | Europe  | Longitudinal (quantitative + qualitative)                                                                          | Year 1: 33 974 of 51 538 (66%); Year 3: 26 174 of 38 131 (69%); Year 5: 20 239 of 19 111 (70%) | 35 years | Residents                                         | 1, 8           |
| Goldacre et al. <sup>108</sup>          | 2010 | Europe  | Longitudinal (quantitative)                                                                                        | Year 1: 27 749 of 38 280 (73%), Year 3: 23 468 of 33 151 (71%), Year 5: 17 689 of 24 870 (71%) | 31 years | Residents                                         | 1, 8           |
| Golden et al. <sup>109</sup>            | 2010 | America | Application observation cross-sectional - Required Fourth-Year Geriatric Clerkship (quantitative + qualitative)    | 150 of 150 (100%)                                                                              | /        | Medical students (4 <sup>th</sup> year of study)  | 12             |
| Golden et al. <sup>110</sup>            | 2014 | America | Application observation longitudinal - Radiation Oncology Clerkships (quantitative + qualitative)                  | 18 of 18 (100%)                                                                                | /        | Medical students (4 <sup>th</sup> year of study)  | 12             |
| Goldenberg et al. <sup>111</sup>        | 2017 | America | Longitudinal (quantitative)                                                                                        | Start: 17 995 of 29 713 (61%); End: 23 712 of 29 713 (78%)                                     | /        | Medical students                                  | 1, 11          |
| Goldman et al. <sup>112</sup>           | 2018 | America | Cross-sectional (quantitative)                                                                                     | Residents: 114 of 295 (39%); Applicants Interventional Radiology: 70 of                        | /        | Applicants + Residents (interventional radiology) | 4              |

|                                        |      |           |                                                                                                                       |                                                                             |          |                                                  |               |
|----------------------------------------|------|-----------|-----------------------------------------------------------------------------------------------------------------------|-----------------------------------------------------------------------------|----------|--------------------------------------------------|---------------|
|                                        |      |           |                                                                                                                       | 169 (41%); Data from earlier survey: 202 of 657 (31%)                       |          |                                                  |               |
| Grayson et al. <sup>113</sup>          | 2001 | America   | Interventional (Community-Based Primary Care Course, Introduction to Primary Care (IPC)) (quantitative)               | 925 of 925 (100%)                                                           | 6 years  | Medical students                                 | 6             |
| Greene et al. <sup>114</sup>           | 2015 | America   | Application observation longitudinal - Surgical Exploration and Discovery (SEAD) Program (quantitative + qualitative) | 18 of 18 (100%)                                                             | /        | Medical students (1 <sup>st</sup> year of study) | 5, 6          |
| Grimm et al. <sup>115</sup>            | 2017 | America   | Cross-sectional (quantitative)                                                                                        | 202 of 657 (31%)                                                            | /        | Applicants (diagnostic radiology)                | 1, 4          |
| Guilloux et al. <sup>116</sup>         | 2019 | Europe    | Cross-sectional (quantitative)                                                                                        | 4 601 of 16 323 (28%)                                                       | /        | Graduates                                        | 1             |
| Guraya and Almaramhy <sup>117</sup>    | 2018 | Asia      | Cross-sectional (quantitative)                                                                                        | 220 of 300 (73%)                                                            | /        | Medical students                                 | 11            |
| Gutiérrez-Cirlos et al. <sup>118</sup> | 2019 | America   | Cross-sectional (quantitative)                                                                                        | 697 of 714 (81%)                                                            | /        | Medical students (last year of study)            | 1, 8          |
| Gutmann et al. <sup>119</sup>          | 2019 | America   | Longitudinal (quantitative)                                                                                           | 51 816 of 74 913 (69%)                                                      | 4 years  | Medical students                                 | 1, 4, 8       |
| Hagopian et al. <sup>120</sup>         | 2015 | America   | Cross-sectional (quantitative)                                                                                        | 117 of 535 (22%)                                                            | 4 years  | Medical students                                 | 1             |
| Halaas et al. <sup>121</sup>           | 2008 | America   | Application observation longitudinal - Rural Physician Associate Program (RPAP) (quantitative)                        | 1 175 of 1 175 (100%)                                                       | 36 years | Medical students (3 <sup>rd</sup> year of study) | 1             |
| Hammoud et al. <sup>122</sup>          | 2006 | America   | Longitudinal (quantitative)                                                                                           | 268 of 483 (55%)                                                            | /        | Medical students (3 <sup>rd</sup> year of study) | 1             |
| Harris et al. <sup>123</sup>           | 2005 | Australia | Cross-sectional (quantitative)                                                                                        | 4 259 of 7 851 (54%)                                                        | /        | Graduates                                        | 1, 4          |
| Hassoulas et al. <sup>124</sup>        | 2017 | Europe    | Application observation cross-sectional - Case-Based Learning (CBL) (quantitative)                                    | 226 of 296 (76%)                                                            | /        | Medical students (2 <sup>nd</sup> year of study) | 12            |
| Hauer et al. <sup>125</sup>            | 2008 | America   | Cross-sectional (quantitative)                                                                                        | 1 177 of 1 439 (82%)                                                        | /        | Medical students (4 <sup>th</sup> year of study) | 1, 2, 6, 7, 8 |
| Hauer et al. <sup>126</sup>            | 2008 | America   | Cross-sectional (quantitative)                                                                                        | 83 of 110 (76%)                                                             | /        | Clerkship-directors                              | 1, 6, 8, 11   |
| Hawthorne and Dinh <sup>127</sup>      | 2017 | America   | Application observation longitudinal - Full-Day 'Intraclerkships' (quantitative)                                      | 372 of 383 (97%)                                                            | /        | Medical students (3 <sup>rd</sup> year of study) | 12            |
| Head et al. <sup>128</sup>             | 2015 | America   | Interventional (Surgical Exploration and Discovery (SEAD) Program) (quantitative)                                     | IG: 18 of 18 (100%); KG: 18 of / (/)                                        | /        | Medical students (1 <sup>st</sup> year of study) | 6             |
| Henderson et al. <sup>130</sup>        | 1996 | America   | Longitudinal (quantitative)                                                                                           | pre: 143 of 144 (99%); post: 181 von 194 (93%); pre+post: 138 of 144 (96%); | /        | Medical students                                 | 1             |

|                                     |      |         |                                                                                                                   |                                                                                                                              |         |                                                                    |          |
|-------------------------------------|------|---------|-------------------------------------------------------------------------------------------------------------------|------------------------------------------------------------------------------------------------------------------------------|---------|--------------------------------------------------------------------|----------|
|                                     |      |         |                                                                                                                   | Graduation: 137 of 188 (73%)                                                                                                 |         |                                                                    |          |
| Henderson et al. <sup>129</sup>     | 2002 | Europe  | Cross-sectional (quantitative)                                                                                    | 700 of 984 (72%)                                                                                                             | /       | Medical students (1 <sup>st</sup> + 5 <sup>th</sup> year of study) | 1, 7, 11 |
| Herold et al. <sup>131</sup>        | 1993 | America | Interventional (Longitudinal Primary Care Training - Public Sector Medicine Program (PSMP)) (quantitative)        | IG: 93; KG: 108; Non- Applicants: 342; total.: 543 of 543 (100%)                                                             | /       | Medical students (1 <sup>st</sup> year of study)                   | 12       |
| Hicks et al. <sup>132</sup>         | 2019 | America | Interventional (Surgical Exploration and Discovery (SEAD) Program) (quantitative)                                 | IG: 30 of 30 (100%); KG: 29 of 29 (100%)                                                                                     | /       | Medical students (1 <sup>st</sup> year of study)                   | 6        |
| Higgins and Thomson <sup>133</sup>  | 2019 | Europe  | Application observation longitudinal - Plastic Surgery Teaching Session (quantitative + qualitative)              | 160 of 279 (57%)                                                                                                             | /       | Medical students (4 <sup>th</sup> year of study)                   | 12       |
| Histing et al. <sup>134</sup>       | 2013 | Europe  | Application observation longitudinal – surgical course: "Playground for future bone docs"(quantitative)           | 119 of 119 (100%)                                                                                                            | /       | Medical students                                                   | 6        |
| Hofhansl and Körmöcz <sup>135</sup> | 2014 | Europe  | Application observation cross-sectional - Mentoring-Program (quantitative)                                        | Mentees: 106 of / (32%); Mentors: 37 of / (54%)                                                                              | /       | Medical students (2 <sup>nd</sup> – 6 <sup>th</sup> year of study) | 4        |
| Holm-Petersen et al. <sup>136</sup> | 2007 | Europe  | Longitudinal (quantitative)                                                                                       | pre: 222 of 305 (73%); post: 160 of 222 (72%)                                                                                | /       | Medical students (4 <sup>th</sup> + 5 <sup>th</sup> year of study) | 1        |
| Holt et al. <sup>137</sup>          | 2019 | Europe  | Application observation longitudinal - Psychiatry Early Experience Program (PEEP) (quantitative + qualitative)    | Baseline- Survey: 40 of 40 (100%); Year 1: 30 of 40 (75%); Year 2: 27 of 40 (68%); Year 3: 22 of 40 (55%)                    | 3 years | Medical students (1 <sup>st</sup> year of study)                   | 6        |
| Hon et al. <sup>138</sup>           | 2020 | America | Application observation cross-sectional - Hands-On Surgical Simulation in Congenital Heart Surgery (quantitative) | 15 of 15 (100%)                                                                                                              | /       | Medical students                                                   | 6        |
| Hor et al. <sup>139</sup>           | 2019 | Asia    | Longitudinal (quantitative + qualitative)                                                                         | 1 <sup>st</sup> Survey: 106 of 111 (96%); 2 <sup>nd</sup> Survey: 103 of 111 (93%); 3 <sup>rd</sup> Survey: 100 of 111 (90%) | /       | Medical students (3 <sup>rd</sup> year of study)                   | 1, 13    |
| Howe and Ives <sup>140</sup>        | 2001 | Europe  | Application observation longitudinal - Community- Based Teaching/Community Placement (quantitative)               | 504 of 692 (73%)                                                                                                             | 1 years | Medical students (3 <sup>rd</sup> + 4 <sup>th</sup> year of study) | 1        |
| Hunt et al. <sup>141</sup>          | 1995 | America | Application observation longitudinal - Physical Diagnosis                                                         | pre: 198 of 204 (97%); post: 135 of 204 (66%)                                                                                | /       | Medical students (2 <sup>nd</sup> year of study)                   | 6, 11    |

|                                         |      |         |                                                                                                               |                                               |         |                                                                                                                     |                 |
|-----------------------------------------|------|---------|---------------------------------------------------------------------------------------------------------------|-----------------------------------------------|---------|---------------------------------------------------------------------------------------------------------------------|-----------------|
|                                         |      |         | Course (quantitative)                                                                                         |                                               |         |                                                                                                                     |                 |
| Huntington et al. <sup>142</sup>        | 2014 | America | Cross-sectional (quantitative)                                                                                | 207 of 742 (28%)                              | /       | Applicants trauma surgery                                                                                           | 1, 3, 4, 11, 14 |
| Ibrahim et al. <sup>143</sup>           | 2016 | Asia    | Cross-sectional (quantitative)                                                                                | 378 of 512 (74%)                              | /       | Graduates                                                                                                           | 1, 7            |
| Ibrahim et al. <sup>144</sup>           | 2014 | Europe  | Cross-sectional (quantitative)                                                                                | 641 of 5 400 (12%)                            | /       | Medical students (last year of study)                                                                               | 1, 7, 11,       |
| Jagadeesan et al. <sup>145</sup>        | 2014 | America | Cross-sectional (quantitative)                                                                                | 70 of 188 (37%)                               | /       | Applicants radio-oncology                                                                                           | 1, 8            |
| Jayakumar et al. <sup>146</sup>         | 2016 | Europe  | Cross-sectional (quantitative)                                                                                | 488 of 40 625 (1,2%)                          | /       | Medical students                                                                                                    | 6, 8, 11        |
| Johnson et al. <sup>147</sup>           | 2012 | America | Cross-sectional (quantitative)                                                                                | 618 of 1 354 (46%)                            | /       | Medical students (4 <sup>th</sup> year of study)                                                                    | 1, 8, 11        |
| Joiner et al. <sup>148</sup>            | 2018 | Europe  | Longitudinal (quantitative + qualitative)                                                                     | 21 of 41 (51%)                                | 2 years | Foundation-Year-Trainees                                                                                            | 1, 11           |
| Kaderli et al. <sup>149</sup>           | 2011 | Europe  | Longitudinal (quantitative)                                                                                   | 185 of 244 (53,8%)                            | /       | Medical students (5 <sup>th</sup> – 7 <sup>th</sup> year of study)                                                  | 1, 7            |
| Kahn et al. <sup>150</sup>              | 2011 | America | Cross-sectional (quantitative)                                                                                | 380 of 662 (57%)                              | /       | Medical students (1 <sup>st</sup> – 4 <sup>th</sup> year of study)                                                  | 1, 4            |
| Kansayisa et al. <sup>151</sup>         | 2018 | Africa  | Cross-sectional (quantitative)                                                                                | 181 of / (49%)                                | /       | Medical students (3 <sup>rd</sup> + 4 <sup>th</sup> year of study)                                                  | 1, 11           |
| Kapoor and Smith <sup>152</sup>         | 2014 | America | Cross-sectional (quantitative)                                                                                | 55 von 122 (45%)                              | /       | Directors of teaching (radiology)                                                                                   | 12              |
| Karmali et al. <sup>153</sup>           | 2017 | America | Application observation longitudinal - Surgical Skills and Technology Elective Program (SSTEP) (quantitative) | 18 of 18 (100%)                               | /       | Medical students (2 <sup>nd</sup> year of study)                                                                    | 6               |
| Kassebaum et al. <sup>154</sup>         | 1996 | America | Longitudinal (quantitative)                                                                                   | 11 680 of 15 888 (74%)                        | /       | Applicants general medicine, internal medicine, pediatricians                                                       | 1, 8            |
| Keepes <sup>155</sup>                   | 1995 | America | Cross-sectional (quantitative)                                                                                | 136 of 259 (52%)                              | /       | Medical students (4 <sup>th</sup> year of study)                                                                    | 1, 7, 8, 11     |
| Kerfoot et al. <sup>156</sup>           | 2005 | America | Cross-sectional (qualitative)                                                                                 | 500 of 1 034 (48%)                            | /       | Applicants urology, emergency medicine                                                                              | 1, 2, 4, 8, 11  |
| Khader et al. <sup>157</sup>            | 2008 | Asia    | Cross-sectional (quantitative)                                                                                | 440 of 562 (78%)                              | /       | Medical students (2 <sup>nd</sup> , 4 <sup>th</sup> , 6 <sup>th</sup> year of study)                                | 11, 12          |
| Khater-Menassa and Major <sup>158</sup> | 2005 | Asia    | Cross-sectional (quantitative)                                                                                | 127 of 131 (97%)                              | /       | Medical students (last year of study)                                                                               | 7, 11           |
| Knox et al. <sup>159</sup>              | 2008 | America | Cross-sectional (quantitative)                                                                                | 304 of 1 480 (21%)                            | /       | Medical students                                                                                                    | 7, 11           |
| Kolasinski et al. <sup>160</sup>        | 2007 | America | Cross-sectional (quantitative)                                                                                | 177 of 469 (38%)                              | /       | Residents (rheumatology)                                                                                            | 1, 4, 7, 8      |
| Kost et al. <sup>161</sup>              | 2019 | America | Cross-sectional (quantitative)                                                                                | 1 814 of 11 998 (15%)                         | /       | Medical students (4 <sup>th</sup> year of study) who are member of the American Academy of Family Physicians (AAFP) | 4, 6            |
| Kozar et al. <sup>162</sup>             | 2004 | America | Cross-sectional (qualitative)                                                                                 | 29 of 210 (14%)                               | /       | Medical students (2 <sup>nd</sup> year of study)                                                                    | 6, 11, 13       |
| Kozar et al. <sup>163</sup>             | 2003 | America | Application observation longitudinal - Brief                                                                  | pre: 121 of 210 (58%); post: 94 of 210 (45%); | /       | Medical students (1 <sup>st</sup> year of study)                                                                    | 6               |

|                                   |      |           |                                                                                                                             |                                                                            |         |                                                                    |                   |
|-----------------------------------|------|-----------|-----------------------------------------------------------------------------------------------------------------------------|----------------------------------------------------------------------------|---------|--------------------------------------------------------------------|-------------------|
|                                   |      |           | Presentation by the Department of Surgery (quantitative)                                                                    | pre+post: 82 of 210 (39%)                                                  |         |                                                                    |                   |
| Kraft et al. <sup>164</sup>       | 2018 | America   | Application observation longitudinal - 2-Week Course: Foundations of Diagnostics and Therapeutics (FDT) (quantitative)      | pre: 170 of 170 (100%); post: 65 of 170 (38%); pre + post: 65 of 170 (38%) | /       | Medical students (1 <sup>st</sup> year of study)                   | 12                |
| Kreykes et al. <sup>165</sup>     | 2020 | America   | Application observation longitudinal - Six 1-h Meetings Covering Aerospace Medicine (quantitative + qualitative)            | pre: 23 of 23 (100%); post 15 of 23 (65%)                                  | /       | Medical students                                                   | 6                 |
| Kuhnigk et al. <sup>166</sup>     | 2009 | Europe    | Cross-sectional (quantitative)                                                                                              | 298 of 341 (87,4%)                                                         | /       | Medical students                                                   | 6, 12             |
| Kumar and Dhaliwal <sup>167</sup> | 2011 | Asia      | Cross-sectional (quantitative)                                                                                              | 282 of 433 (74%)                                                           | /       | Medical students                                                   | 1, 7, 8           |
| Kumar et al. <sup>168</sup>       | 2018 | America   | Application observation longitudinal - Webinar-Based Course in Interventional Radiology (quantitative)                      | pre + post: 166 of / (74%)                                                 | /       | Medical students                                                   | 6                 |
| Kurlandsky et al. <sup>169</sup>  | 1994 | America   | Cross-sectional (quantitative)                                                                                              | 463 of 499 (93%)                                                           | 5 years | Medical students                                                   | 12                |
| Kurowecki et al. <sup>170</sup>   | 2020 | America   | Cross-sectional (quantitative + qualitative)                                                                                | 152 of 708 (22%)                                                           | /       | Residents                                                          | 4, 11             |
| Kuteesa et al. <sup>171</sup>     | 2021 | Africa    | Cross-sectional (quantitative + qualitative)                                                                                | 135 of 145 (93%) + 31 Focus-group- interviews                              | /       | Medical students (5 <sup>th</sup> year of study)                   | 4, 5, 7, 8, 9, 11 |
| Kutikov et al. <sup>172</sup>     | 2011 | America   | Cross-sectional (quantitative)                                                                                              | 413 of 1 009 (41%)                                                         | 5 years | Applicants urology                                                 | 1, 6, 8, 11       |
| Lampe et al. <sup>173</sup>       | 2010 | Australia | Cross-sectional (quantitative + qualitative)                                                                                | 76 of 82 (93%)                                                             | /       | Medical students (3 <sup>rd</sup> + 4 <sup>th</sup> year of study) | 1, 2, 8           |
| Lau et al. <sup>174</sup>         | 2015 | America   | Longitudinal (quantitative + qualitative)                                                                                   | 17 von 117 (100%)                                                          | /       | Directors of teaching (psychiatry)                                 | 1, 8              |
| Lawal and Afolabi <sup>175</sup>  | 2013 | Africa    | Cross-sectional (quantitative)                                                                                              | 271 of 310 (87%)                                                           | 5 years | Internship                                                         | 5, 7              |
| Lebastchi et al. <sup>176</sup>   | 2017 | America   | Cross-sectional (quantitative)                                                                                              | 346 of / (74%)                                                             | /       | Applicants urology                                                 | 1, 4              |
| Lee et al. <sup>177</sup>         | 1995 | America   | Cross-sectional (quantitative)                                                                                              | 57 of 113 (50%)                                                            | /       | Medical students (4 <sup>th</sup> year of study)                   | 1, 8, 11, 13      |
| Lee et al. <sup>178</sup>         | 2021 | Asia      | Longitudinal (quantitative)                                                                                                 | 86 of 100 (86%)                                                            | 3 years | Medical students                                                   | 1, 8              |
| Lee et al. <sup>179</sup>         | 2011 | America   | Application observation longitudinal - High-Fidelity Simulation-Based Preclinical Endovascular Skills Course (quantitative) | pre+post: 52 of 52 (100%); Follow-up: 46 of 52 (90%)                       | 3 years | Medical students (1 <sup>st</sup> + 2 <sup>nd</sup> year of study) | 1, 4, 6, 7, 11    |
| Lefevre et al. <sup>180</sup>     | 2010 | Europe    | Cross-sectional (quantitative)                                                                                              | 1 780 of 2 588 (62%)                                                       | /       | Medical students                                                   | 1                 |
| Leong et al. <sup>181</sup>       | 2005 | America   | Application observation longitudinal - Two-Session Career-Development                                                       | pre: 161 of 161 (100%); post: 117 of 161 (73%)                             | /       | Medical students (2 <sup>nd</sup> year of study)                   | 6                 |

|                                    |      |           |                                                                                                                                                                   |                                                                                                                                        |         |                                                                    |                |
|------------------------------------|------|-----------|-------------------------------------------------------------------------------------------------------------------------------------------------------------------|----------------------------------------------------------------------------------------------------------------------------------------|---------|--------------------------------------------------------------------|----------------|
|                                    |      |           | Workshop (quantitative)                                                                                                                                           |                                                                                                                                        |         |                                                                    |                |
| Lindeman et al. <sup>182</sup>     | 2013 | America   | Cross-sectional (quantitative)                                                                                                                                    | 275 of 700 (39%)                                                                                                                       | /       | Medical students (4 <sup>th</sup> year of study)                   | 1, 4           |
| López-García et al. <sup>183</sup> | 2019 | Europe    | Longitudinal (quantitative)                                                                                                                                       | Albacete: pre: 74 of 88 (84%), post: 87 of 88 (99%), End of study: 73 of 88 (83%); Seville: pre: 50 of 65 (77%), End of study: 98 of / | 4 years | Medical students                                                   | 12             |
| Lou et al. <sup>184</sup>          | 2013 | America   | Interventional (Supervised and Unsupervised Practice on a Coronary Anastomosis Simulator) (quantitative)                                                          | 45 of 45 (100%)                                                                                                                        | /       | Medical students (1 <sup>st</sup> – 4 <sup>th</sup> year of study) | 6              |
| Lukas et al. <sup>185</sup>        | 2017 | Asia      | Cross-sectional (quantitative)                                                                                                                                    | 103 of 200 (52%)                                                                                                                       | /       | Medical students; Residents; Specialists; (senior) Physicians      | 1, 4, 7, 8, 11 |
| Lyons et al. <sup>186</sup>        | 2015 | Australia | Application observation longitudinal - The Claassen Institute of Psychiatry for Medical Students (the Institute): An Innovative Enrichment Program (quantitative) | pre+post: 117 of 117 (100%); Follow-up: 47 of 89 (53%)                                                                                 | 7 years | Medical students                                                   | 6              |
| Lyons and Janca <sup>187</sup>     | 2015 | Australia | Longitudinal (quantitative)                                                                                                                                       | pre: 150 of 238 (63%); post: 161 of 230 (70%)                                                                                          | /       | Medical students (4 <sup>th</sup> year of study)                   | 1              |
| MacDowell et al. <sup>188</sup>    | 2013 | America   | Application observation cross-sectional - Rockford Rural Medical Education (RMED) Program (quantitative)                                                          | 2 823 of 3 064 (92%); IG: 160; Comparison-group: 2 663                                                                                 | /       | Medical students                                                   | 12             |
| Madan et al. <sup>189</sup>        | 2005 | America   | Interventional (Laparoscopic Skills Course) (quantitative)                                                                                                        | 59 of / (/)                                                                                                                            | /       | Medical students (1 <sup>st</sup> + 2 <sup>nd</sup> year of study) | 6              |
| Madani et al. <sup>190</sup>       | 2019 | Asia      | Cross-sectional (quantitative)                                                                                                                                    | 519 of / (/)                                                                                                                           | /       | Medical students (4 <sup>th</sup> year of study)                   | 1, 6, 7, 11    |
| Mahendran et al. <sup>191</sup>    | 2015 | Asia      | Longitudinal (quantitative)                                                                                                                                       | 100 of 30 (77%)                                                                                                                        | /       | Medical students                                                   | 1              |
| Maiorova et al. <sup>192</sup>     | 2008 | Europe    | Longitudinal (quantitative)                                                                                                                                       | pre: 852 of 923 (92%); post: 661 of 923 (72%); pre+post: 593 of 923 (64,2%)                                                            | /       | Medical students                                                   | 1, 7           |
| Malikova et al. <sup>193</sup>     | 2010 | America   | Longitudinal (quantitative)                                                                                                                                       | 99 of 197 (50%)                                                                                                                        | /       | Medical students                                                   | 4, 11          |
| Manassis et al. <sup>194</sup>     | 2006 | America   | Cross-sectional (quantitative)                                                                                                                                    | 30 of 125 (24%)                                                                                                                        | /       | Residents (psychiatry)                                             | 1, 4, 6, 8     |
| Markovic et al. <sup>195</sup>     | 2012 | America   | Application observation longitudinal - Endovascular Simulator Training (quantitative)                                                                             | 76 of 80 (95%)                                                                                                                         | /       | Medical students                                                   | 4, 6           |
| Martin et al. <sup>196</sup>       | 2007 | America   | Interventional (Brief Presentation in Child-Psychiatry) (quantitative)                                                                                            | pre: 218 of 222 (98%); post: 177 of 222 (80%)                                                                                          | /       | Medical students (3 <sup>rd</sup> year of study)                   | 6              |

|                                 |      |           |                                                                                                                         |                                                                                                                                                                                                                                                                                          |                                           |                                                                        |               |
|---------------------------------|------|-----------|-------------------------------------------------------------------------------------------------------------------------|------------------------------------------------------------------------------------------------------------------------------------------------------------------------------------------------------------------------------------------------------------------------------------------|-------------------------------------------|------------------------------------------------------------------------|---------------|
| Martini et al. <sup>197</sup>   | 1994 | America   | Cross-sectional (quantitative)                                                                                          | University: MD-University: 111 of 121 (92%); DO-University: 14 of 15 (93%); Residents: MD-Residents: approx. 1 950 of 2 600 (75%); DO-Residents: approx. 320 of 355 (90%)                                                                                                                | /                                         | General practitioners, Internists, Pediatricians; medical universities | 1, 7, 8       |
| Matalon et al. <sup>198</sup>   | 2018 | America   | Cross-sectional (quantitative + qualitative)                                                                            | 488 of / (/)                                                                                                                                                                                                                                                                             | /                                         | Residents (radiology)                                                  | 1, 4, 6, 7, 8 |
| Matsos et al. <sup>199</sup>    | 2018 | America   | Cross-sectional (quantitative)                                                                                          | 54 of / (/)                                                                                                                                                                                                                                                                              | /                                         | Residents (internal medicine)                                          | 1, 4          |
| Matsumoto et al. <sup>200</sup> | 2019 | America   | Cross-sectional (quantitative)                                                                                          | 66 of 507 (13%)                                                                                                                                                                                                                                                                          | /                                         | Medical students                                                       | 1             |
| Matthews et al. <sup>201</sup>  | 2015 | Australia | Application observation cross-sectional - Regional and Rural Immersion Program, Pūkawakawa (quantitative + qualitative) | 45 of 72 (63%)                                                                                                                                                                                                                                                                           | /                                         | Medical students                                                       | 1             |
| Maudsley et al. <sup>202</sup>  | 2010 | Europe    | Cross-sectional + longitudinal (quantitative + qualitative)                                                             | Cross-sectional: 1999-2000: Start-Y1: 153 of 228 (67%), End-Y1: 137 of 224 (61%), Mid-Y3: 158 of 204 (77,5%); 2001: Start-Y1: 199 of 283 (70%), End-Y1: 196 of 279 (70%); 2001/02: Pre-Interviews: 962 of 1 064 (90%), Mid-Y5: 115 of 317 (36%); Longitudinal: Pairing of collected data | 1999: 3 years, 2001: 1 year 2001: 5 years | Medical students                                                       | 1, 12         |
| Mayes et al. <sup>203</sup>     | 2016 | Europe    | Longitudinal (quantitative)                                                                                             | 36 of 45 (80%)                                                                                                                                                                                                                                                                           | /                                         | Medical students (3 <sup>rd</sup> year of study)                       | 1             |
| Mazeh et al. <sup>204</sup>     | 2010 | Asia      | Cross-sectional (quantitative)                                                                                          | 218 of 688 (32%)                                                                                                                                                                                                                                                                         | /                                         | Medical students (6 <sup>th</sup> year of study)                       | 1, 11         |
| McCaffrey <sup>205</sup>        | 2005 | America   | Cross-sectional (quantitative)                                                                                          | 93 of 101 (92%)                                                                                                                                                                                                                                                                          | /                                         | Applicants ENT                                                         | 4, 11         |
| McCord et al. <sup>206</sup>    | 2009 | America   | Cross-sectional (quantitative)                                                                                          | 83 of 99 (84%)                                                                                                                                                                                                                                                                           | /                                         | General surgeons                                                       | 4             |
| McDonald et al. <sup>207</sup>  | 2021 | America   | Longitudinal (quantitative)                                                                                             | 374 of / (approx. 70%) – for each of the 3 graduating cohorts                                                                                                                                                                                                                            | 7 years                                   | Medical students                                                       | 4             |
| McHugh et al. <sup>208</sup>    | 2011 | Europe    | Cross-sectional + longitudinal (quantitative)                                                                           | Quantitative survey: 381 of 381 (100%); Online- Survey: 418 of 1 609 (26%); Follow-up: 232 of 381 (61%)                                                                                                                                                                                  | 5 years                                   | Residents (general surgery)                                            | 1, 7          |
| McKechnie et al. <sup>209</sup> | 2021 | America   | Cross-sectional (quantitative + qualitative)                                                                            | 228 of (approx.) 1 493 (15%)                                                                                                                                                                                                                                                             | /                                         | Residents (surgery)                                                    | 1, 4, 8       |
| McKee et al. <sup>210</sup>     | 2007 | America   | Application observation longitudinal - Family Medicine                                                                  | 18 of 60 (30%)                                                                                                                                                                                                                                                                           | /                                         | Medical students                                                       | 6             |

|                                    |      |         |                                                                                                                         |                                                                                    |         |                                                                                                           |             |
|------------------------------------|------|---------|-------------------------------------------------------------------------------------------------------------------------|------------------------------------------------------------------------------------|---------|-----------------------------------------------------------------------------------------------------------|-------------|
|                                    |      |         | Interest Group (quantitative + qualitative)                                                                             |                                                                                    |         |                                                                                                           |             |
| McLean <sup>211</sup>              | 2006 | Africa  | Cross-sectional (quantitative)                                                                                          | 645 of 745 (87%)                                                                   | 2 years | Medical students                                                                                          | 1, 7        |
| McParland et al. <sup>212</sup>    | 2003 | Europe  | Longitudinal (quantitative)                                                                                             | 379 of 450 (84%)                                                                   | /       | Medical students (4 <sup>th</sup> year of study)                                                          | 1, 11       |
| Mehmood et al. <sup>213</sup>      | 2012 | Asia    | Cross-sectional (quantitative)                                                                                          | 550 of 590 (93%)                                                                   | /       | Medical students (1 <sup>st</sup> – 5 <sup>th</sup> year of study)                                        | 1, 7, 11    |
| Mihalynuk et al. <sup>214</sup>    | 2006 | America | Cross-sectional (quantitative + qualitative)                                                                            | 113 of 124 (91%)                                                                   | /       | Medical students (3 <sup>rd</sup> year of study)                                                          | 1           |
| Montgomery et al. <sup>215</sup>   | 2015 | America | Cross-sectional (quantitative)                                                                                          | 518 of 699 (74%)                                                                   | /       | Medical students                                                                                          | 7           |
| Moore et al. <sup>216</sup>        | 2017 | Europe  | Cross-sectional (quantitative + qualitative)                                                                            | 42 of 68 (62%); Interviews: 13 of 42 (31%)                                         | /       | Residents anesthesia                                                                                      | 1, 2, 7     |
| Morrison and Murray <sup>217</sup> | 1996 | Europe  | Longitudinal (quantitative)                                                                                             | 131 of 206 (64%)                                                                   | 2 years | Medical students (last year of study)                                                                     | 1           |
| Mortlock et al. <sup>218</sup>     | 2017 | Europe  | Application observation longitudinal - One-Day Visit to a High Secure Forensic Psychiatric (quantitative + qualitative) | 245 of 289 (88%)                                                                   | /       | Medical students (3 <sup>rd</sup> + 4 <sup>th</sup> year of study)                                        | 1           |
| Mulcare et al. <sup>219</sup>      | 2011 | America | Cross-sectional (quantitative)                                                                                          | 23 of 32 (72%)                                                                     | /       | Clerkship-directors                                                                                       | 1           |
| Mutha et al. <sup>220</sup>        | 1997 | America | Cross-sectional (quantitative + qualitative)                                                                            | 52 of / (70%)                                                                      | /       | Medical students (3 <sup>rd</sup> + 4 <sup>th</sup> year of study)                                        | 1, 4, 7     |
| Nakhoul et al. <sup>221</sup>      | 2021 | America | Cross-sectional (quantitative)                                                                                          | 415 of 1 992 (21%)                                                                 | /       | Residents (internal medicine)                                                                             | 1, 4        |
| Ndetei et al. <sup>222</sup>       | 2013 | Africa  | Cross-sectional (quantitative)                                                                                          | 254 of 300 (85%)                                                                   | /       | Medical students (last year of study)                                                                     | 1, 7, 8     |
| Nelson et al. <sup>223</sup>       | 2020 | America | Cross-sectional (quantitative + qualitative)                                                                            | 244 of 268 (91%); Oncologists: 25 of 32 (78%)                                      | /       | Oncologists                                                                                               | 6           |
| Ng et al. <sup>224</sup>           | 2020 | Asia    | Cross-sectional (quantitative)                                                                                          | Up to 1 780 of 1 780 (89 - 100%)                                                   | 3 years | Medical students (3 <sup>rd</sup> + 5 <sup>th</sup> year of study)                                        | 1, 7, 8, 11 |
| Ng et al. <sup>225</sup>           | 2020 | America | Cross-sectional (quantitative)                                                                                          | Residents: 78 of 2 031 (4%); Faculties: 44 of 188 (23%)                            | /       | Residents (nuclear medicine and molecular imaging); Directors of teaching; Directors of training programs | 1, 4, 6, 8  |
| Ní Chróinín et al. <sup>226</sup>  | 2013 | Europe  | Application observation longitudinal - 6-week Medicine in the Community Module (quantitative)                           | pre: 167 of 336 (50%); post: 274 of 336 (82%)                                      | 2 years | Medical students (last year of study)                                                                     | 6           |
| Noble <sup>227</sup>               | 2006 | America | Cross-sectional (quantitative)                                                                                          | Ophthalmologists: 405 of 1 062 (38%); Non-Ophthalmologists: 20 891 of 58 337 (36%) | /       | Physicians                                                                                                | 4           |
| Noble et al. <sup>228</sup>        | 2007 | America | Cross-sectional (quantitative)                                                                                          | 49 of 128 (38%)                                                                    | /       | Residents (ophthalmology)                                                                                 | 4, 6        |
| O'Donoghue et al. <sup>229</sup>   | 2015 | Europe  | Cross-sectional (quantitative + qualitative)                                                                            | 64 of 95 (66%)                                                                     | /       | Medical students                                                                                          | 1, 7, 11    |

|                                      |      |           |                                                                                                                 |                                                                         |         |                                                                                                |                    |
|--------------------------------------|------|-----------|-----------------------------------------------------------------------------------------------------------------|-------------------------------------------------------------------------|---------|------------------------------------------------------------------------------------------------|--------------------|
| O'Herrin et al. <sup>230</sup>       | 2003 | America   | Cross-sectional (qualitative)                                                                                   | /                                                                       | 2 years | Medical students                                                                               | 1                  |
| Onyemaechi et al. <sup>231</sup>     | 2017 | Africa    | Cross-sectional (quantitative)                                                                                  | 152 of 155 (98%)                                                        | /       | Medical students (last year of study)                                                          | 1, 7, 11           |
| Osborn <sup>232</sup>                | 1993 | America   | Cross-sectional (quantitative)                                                                                  | 102 of 142 (72%)                                                        | /       | Medical students (last year of study)                                                          | 1, 4, 8            |
| Parekh et al. <sup>233</sup>         | 2021 | Europe    | Longitudinal (qualitative)                                                                                      | /                                                                       | /       | Medical students (last 2 years of study)                                                       | 1, 7, 13           |
| Parker et al. <sup>234</sup>         | 2014 | Australia | Cross-sectional (qualitative)                                                                                   | /                                                                       | /       | Medical students (last year of study)                                                          | 1, 7, 9, 11,13     |
| Pearson and Westra <sup>235</sup>    | 2016 | America   | Application observation cross-sectional - Obstetrical Longitudinal Course (OBLC) (quantitative)                 | 102 of 206 (50%)                                                        | /       | Medical students (1 <sup>st</sup> year of study)                                               | 6                  |
| Pearson et al. <sup>236</sup>        | 2002 | Australia | Cross-sectional (quantitative)                                                                                  | 2 469 of 3 747 (66%)                                                    | /       | Physicians                                                                                     | 12                 |
| Peiffer-Smadja et al. <sup>237</sup> | 2020 | Europe    | Cross-sectional (quantitative)                                                                                  | 90 of 100 (90%)                                                         | /       | Residents (infectious and tropical diseases)                                                   | 1, 8               |
| Phillips and Charnley <sup>238</sup> | 2016 | America   | Longitudinal (quantitative)                                                                                     | 92 of 150 (61%)                                                         | /       | Medical students (3 <sup>rd</sup> year of study)                                               | 1                  |
| Pianosi et al. <sup>239</sup>        | 2016 | Asia      | Cross-sectional (qualitative)                                                                                   | 70 of / (/)                                                             | 5 years | Medical students (4 <sup>th</sup> year of study)                                               | 1, 6, 7, 9, 11, 13 |
| Piccinato et al. <sup>240</sup>      | 2017 | America   | Cross-sectional (quantitative + qualitative)                                                                    | 64 of 96 (67%)                                                          | /       | Residents (surgery)                                                                            | 7                  |
| Pointer et al. <sup>241</sup>        | 2017 | America   | Cross-sectional (quantitative)                                                                                  | 61 of 112 (54%)                                                         | /       | Residents (surgery)                                                                            | 1, 2, 4, 8, 11     |
| Pokrzywko et al. <sup>242</sup>      | 2019 | America   | Interventional (Geriatric-Psychiatry Rotation) (quantitative)                                                   | 84 of 105 (80%) - thereof IG: 44, KG: 40                                | 2 years | Medical students (3 <sup>rd</sup> year of study)                                               | 1                  |
| Polsky and Werner <sup>243</sup>     | 2004 | America   | Cross-sectional (quantitative)                                                                                  | Specialists: 936 of 1432 (65%) – Use of 756; Residents: 80 of 152 (53%) | /       | Specialists + Residents neuropsychiatric                                                       | 1,4                |
| Poole et al. <sup>244</sup>          | 2009 | Australia | Cross-sectional (quantitative)                                                                                  | Start of study: 216 of 307 (70%); End of study: 115 of 130 (88%)        | 6 years | Medical students                                                                               | 1, 7, 8            |
| Prud'homme et al. <sup>245</sup>     | 2020 | Europe    | Cross-sectional (quantitative)                                                                                  | 139 of 171 (81%)                                                        | /       | Applicants geriatrics                                                                          | 1                  |
| Pullen et al. <sup>246</sup>         | 2013 | America   | Application observation longitudinal - Video-Teleconferencing in Child and Adolescent Psychiatry (quantitative) | Start: 175 of 540 (32%); Follow-up: 43 v of 44 (97%)                    | /       | Medical students (1 <sup>st</sup> + 2 <sup>nd</sup> year of study)                             | 6                  |
| Querido et al. <sup>247</sup>        | 2018 | Europe    | Cross-sectional (qualitative)                                                                                   | /                                                                       | /       | Medical students (last year of study)                                                          | 1, 4, 6, 7         |
| Rahbar et al. <sup>248</sup>         | 2010 | America   | Cross-sectional (quantitative)                                                                                  | 179 of / (/)                                                            | /       | Rheumatologists; Residents internal medicine; Medical students (3 <sup>rd</sup> year of study) | 1, 7               |
| Ramaswamy et al. <sup>249</sup>      | 2019 | America   | Cross-sectional (quantitative)                                                                                  | 167 of / (/)                                                            | /       | Medical students; Residents                                                                    | 1, 3, 4, 8, 11     |
| Rao et al. <sup>250</sup>            | 2017 | America   | Cross-sectional (quantitative)                                                                                  | 657 of 4721 (14%) – estimated                                           | /       | Medical students                                                                               | 1, 4               |

|                                        |      |           |                                                                                                                                              |                                                                                |           |                                                                    |                     |
|----------------------------------------|------|-----------|----------------------------------------------------------------------------------------------------------------------------------------------|--------------------------------------------------------------------------------|-----------|--------------------------------------------------------------------|---------------------|
| Ravindra et al. <sup>251</sup>         | 2013 | Europe    | Cross-sectional (quantitative)                                                                                                               | 204 of 312 (65%)                                                               | /         | Medical students (last year of study)                              | 1                   |
| Ravindra and Fitzgerald <sup>252</sup> | 2011 | Europe    | Cross-sectional (quantitative)                                                                                                               | 208 of 320 (65%)                                                               | /         | Graduates                                                          | 2, 7, 8, 11         |
| Ray et al. <sup>253</sup>              | 2018 | America   | Cross-sectional (quantitative)                                                                                                               | 793 of 1 372 (58%)                                                             | /         | Applicants emergency medicine                                      | 1                   |
| Redman et al. <sup>254</sup>           | 1994 | Europe    | Cross-sectional (quantitative)                                                                                                               | 903 of 1 271 (71%)                                                             | /         | Medical students (last year of study + practical year)             | 7, 11, 14           |
| Rehman et al. <sup>255</sup>           | 2011 | Asia      | Cross-sectional (quantitative)                                                                                                               | 771 of 850 (91%)                                                               | 1 years   | Medical students                                                   | 7                   |
| Retrouvey et al. <sup>256</sup>        | 2018 | America   | Application observation longitudinal - Radiology Faculty-Mentored Video Modules (quantitative)                                               | Preparatory-Phase: 182 of 182 (100%); 3 <sup>rd</sup> Phase: 153 of 153 (100%) | /         | Medical students (1 <sup>st</sup> year of study)                   | 6                   |
| Roberts and Khursandi <sup>257</sup>   | 2002 | Australia | Cross-sectional (quantitative + qualitative)                                                                                                 | 297 of 488 (61%)                                                               | /         | Anesthesiologists                                                  | 1, 7                |
| Rojnic Kuzman et al. <sup>258</sup>    | 2013 | Europe    | Cross-sectional (quantitative)                                                                                                               | 122 of 200 (61%)                                                               | 1,5 years | Medical students (last year of study)                              | 1, 8                |
| Roy et al. <sup>259</sup>              | 2020 | America   | Application observation longitudinal - Plastic Surgery Mini-elective (quantitative)                                                          | pre: 25 of / (/); post: 22 of / (/)                                            | /         | Medical students (1 <sup>st</sup> + 2 <sup>nd</sup> year of study) | 6                   |
| Rubeck et al. <sup>260</sup>           | 1995 | America   | Cross-sectional (quantitative)                                                                                                               | 336 of 704 (48%)                                                               | /         | Physicians primary care; academic physicians                       | 4, 7                |
| Russo et al. <sup>261</sup>            | 2020 | America   | Cross-sectional (qualitative)                                                                                                                | /                                                                              | /         | Residents (psychiatry)                                             | 1, 11, 13           |
| Ryan et al. <sup>262</sup>             | 2018 | Europe    | Cross-sectional (quantitative + qualitative)                                                                                                 | 846 of 3 766 (22%) – Use of 231                                                | /         | Residents                                                          | 1, 4, 7, 9, 11, 14  |
| Saalwachter et al. <sup>263</sup>      | 2005 | America   | Cross-sectional (quantitative)                                                                                                               | 4 308 of / (/)                                                                 | /         | Medical students; Residents + specialists surgery                  | 1, 11               |
| Saberski et al. <sup>264</sup>         | 2015 | America   | Application observation longitudinal - Real-time Cadaveric Laparoscopy and Laparoscopic Video Demonstrations in Gross Anatomy (quantitative) | /                                                                              | /         | Medical students (1 <sup>st</sup> year of study)                   | 12                  |
| Saigal et al. <sup>265</sup>           | 2007 | Asia      | Cross-sectional (qualitative)                                                                                                                | /                                                                              | /         | Medical students (3 <sup>rd</sup> – 6 <sup>th</sup> year of study) | 1, 4, 7, 11         |
| Sammann et al. <sup>266</sup>          | 2007 | America   | Interventional (Elective Called "OR Assist") (quantitative + qualitative)                                                                    | IG: 75 of 86 (87%); KG: /                                                      | /         | Medical students (1 <sup>st</sup> + 2 <sup>nd</sup> year of study) | 6                   |
| Sanfey et al. <sup>267</sup>           | 2006 | America   | Cross-sectional (quantitative + qualitative)                                                                                                 | 1 300 of / (/)                                                                 | /         | Medical students                                                   | 1, 7, 9, 11, 13, 14 |
| Schnuth et al. <sup>268</sup>          | 2003 | America   | Cross-sectional (quantitative + qualitative)                                                                                                 | 203 of 402 (50%)                                                               | /         | Medical students (1 <sup>st</sup> – 4 <sup>th</sup> year of study) | 7, 8, 11            |
| Schwartz et al. <sup>269</sup>         | 1995 | America   | Cross-sectional (quantitative)                                                                                                               | 1 244 of 1 635 (76%)                                                           | /         | Graduates                                                          | 1                   |
| Schwartz et al. <sup>270</sup>         | 2011 | America   | Cross-sectional (quantitative)                                                                                                               | 1990: 1 244 of 1 650 (75%); 2007:                                              | /         | Medical students                                                   | 1, 2, 11            |

|                                 |      |           |                                                                                                                    |                                                                                                                                                                                                             |         |                                                                    |                       |
|---------------------------------|------|-----------|--------------------------------------------------------------------------------------------------------------------|-------------------------------------------------------------------------------------------------------------------------------------------------------------------------------------------------------------|---------|--------------------------------------------------------------------|-----------------------|
|                                 |      |           |                                                                                                                    | 1 177 of 1 439 (82%)                                                                                                                                                                                        |         |                                                                    |                       |
| Scott et al. <sup>271</sup>     | 2007 | America   | Longitudinal (quantitative)                                                                                        | 1 <sup>st</sup> Survey: 1 188 of 1 321 (90%); 2 <sup>nd</sup> survey: 845 of 1 188 (71%)                                                                                                                    | 5 years | Medical students                                                   | 1, 2, 4, 8, 9, 11, 12 |
| Scott et al. <sup>272</sup>     | 2007 | America   | Longitudinal (qualitative)                                                                                         | /                                                                                                                                                                                                           | 3 years | Medical students                                                   | 1, 2, 7, 11, 13       |
| Sedaghat et al. <sup>273</sup>  | 2012 | Australia | Application observation cross-sectional - The Nepean Summer Vacation Surgical Program (quantitative + qualitative) | 55 of 107 (51%)                                                                                                                                                                                             | 3 years | Medical students (1 <sup>st</sup> + 2 <sup>nd</sup> year of study) | 6                     |
| Seo et al. <sup>274</sup>       | 2017 | Asia      | Application observation cross-sectional - One-Day Surgical-Skill Training Course (quantitative)                    | 91 of 91 (100%)                                                                                                                                                                                             | /       | Medical students (1 <sup>st</sup> – 4 <sup>th</sup> year of study) | 6                     |
| Seow et al. <sup>275</sup>      | 2018 | Asia      | Cross-sectional (quantitative)                                                                                     | 502 of / (/)                                                                                                                                                                                                | /       | Medical students                                                   | 1, 4, 5, 6, 8, 11     |
| Shaikh et al. <sup>276</sup>    | 2016 | Europe    | Longitudinal (quantitative)                                                                                        | pre: 236 of 309 (76%); post: 157 of 309 (50%)                                                                                                                                                               | /       | Medical students (4 <sup>th</sup> year of study)                   | 12                    |
| Shelton et al. <sup>277</sup>   | 2019 | America   | Application observation longitudinal - Laparoscopic Box Trainer (quantitative)                                     | 64 of 64 (100%)                                                                                                                                                                                             | /       | Medical students (1 <sup>st</sup> – 3 <sup>rd</sup> year of study) | 6                     |
| Shen et al. <sup>278</sup>      | 2014 | Asia      | Longitudinal (quantitative)                                                                                        | 325 of 368 (88%)                                                                                                                                                                                            | /       | Medical students (4 <sup>th</sup> year of study)                   | 1                     |
| Shepherd et al. <sup>279</sup>  | 2003 | America   | Cross-sectional (quantitative + qualitative)                                                                       | 411 of 2 852 (14%)                                                                                                                                                                                          | /       | Medical students (2 <sup>nd</sup> year of study)                   | 6                     |
| Shipper et al. <sup>280</sup>   | 2017 | America   | Application observation longitudinal - Technical and Nontechnical Skills Curriculum (quantitative)                 | pre: 30 of 30 (100%); post: 28 of 30 (93%)                                                                                                                                                                  | /       | Medical students (preclinical years)                               | 6                     |
| Shipper et al. <sup>281</sup>   | 2018 | America   | Application observation cross-sectional - Technical and Nontechnical Skills Curriculum (qualitative)               | /                                                                                                                                                                                                           | /       | Medical students; Teachers                                         | 6                     |
| Shrestha et al. <sup>282</sup>  | 2016 | Asia      | Cross-sectional (quantitative)                                                                                     | 83 of 94 (87%)                                                                                                                                                                                              | /       | Graduates                                                          | 1, 7, 8               |
| Siassakos et al. <sup>283</sup> | 2009 | Europe    | Application observation longitudinal - O&G attachment (quantitative)                                               | / of 48 (/)                                                                                                                                                                                                 | /       | Medical students (4 <sup>th</sup> year of study)                   | 1, 2, 8, 14           |
| Simões et al. <sup>284</sup>    | 2018 | America   | Cross-sectional (quantitative)                                                                                     | 276 of 363 (76%)                                                                                                                                                                                            | /       | Medical students                                                   | 6                     |
| Sinclair et al. <sup>285</sup>  | 2006 | Europe    | Longitudinal (quantitative + qualitative)                                                                          | Year 1: 172 of 172 (100%), Year 2: 131 of 169 78%, Year 3: 116 of 165 (70%), Year 4: 108 of 168 (64%), Year 5: 105 of 161 (65%), 1 <sup>st</sup> PGY: 100 of 168 (60%); Start + End: 66 (38,4%); Start till | 6 years | Medical students + Postgradual-Year 1                              | 1, 8                  |

|                                    |      |           |                                                                                                                       |                                                        |          |                                                                    |                        |
|------------------------------------|------|-----------|-----------------------------------------------------------------------------------------------------------------------|--------------------------------------------------------|----------|--------------------------------------------------------------------|------------------------|
|                                    |      |           |                                                                                                                       | End (all): 32 (18,6%)                                  |          |                                                                    |                        |
| Singh and Alberti <sup>286</sup>   | 2020 | Europe    | Cross-sectional (qualitative)                                                                                         | /                                                      | /        | Medical students (last year of study)                              | 1, 7, 8, 9, 11, 13, 14 |
| Skokauskas et al. <sup>287</sup>   | 2012 | Europe    | Cross-sectional (quantitative)                                                                                        | 114 of 124 (92%)                                       | /        | Medical students (4 <sup>th</sup> year of study)                   | 12                     |
| Skorus et al. <sup>288</sup>       | 2020 | Europe    | Cross-sectional (quantitative)                                                                                        | 595 of / (/)                                           | /        | Medical students                                                   | 1, 4, 9, 14            |
| Smith et al. <sup>289</sup>        | 2017 | America   | Cross-sectional (qualitative)                                                                                         | /                                                      | 6 years  | Medical students (4 <sup>th</sup> year of study)                   | 13, 14                 |
| Sobral <sup>290</sup>              | 2006 | America   | Longitudinal (quantitative)                                                                                           | 578 of / (/)                                           | 10 years | Medical students                                                   | 1, 4,                  |
| Solomon and DiPette <sup>291</sup> | 1994 | America   | Cross-sectional (quantitative)                                                                                        | 176 of 182 (97%)                                       | /        | Medical students (4 <sup>th</sup> year of study)                   | 1, 7, 8                |
| Sorouri et al. <sup>292</sup>      | 2021 | America   | Application observation longitudinal - Surgical Exploration and Discovery (SEAD) (qualitative)                        | /                                                      | /        | Medical students (1 <sup>st</sup> year of study)                   | 4, 7, 14               |
| Sozio et al. <sup>293</sup>        | 2019 | America   | Cross-sectional (qualitative)                                                                                         | /                                                      | /        | Teachers nephrology; Nephrologists                                 | 1, 4, 6, 7, 8, 12      |
| Spiers et al. <sup>294</sup>       | 2019 | Europe    | Application observation longitudinal -1-Day Otolaryngology Course (quantitative + qualitative)                        | 35 of 36 (97%)                                         | /        | Medical students (1 <sup>st</sup> – 5 <sup>th</sup> year of study) | 6                      |
| Sripa et al. <sup>295</sup>        | 2020 | Asia      | Cross-sectional (quantitative)                                                                                        | 259 of 390 (66%)                                       | /        | Residents                                                          | 1, 8, 11               |
| Stahn and Harendza <sup>296</sup>  | 2014 | Europe    | Cross-sectional (qualitative)                                                                                         | /                                                      | /        | Residents + (senior) physicians                                    | 1, 2, 7, 10, 11        |
| Stearns et al. <sup>297</sup>      | 1993 | America   | Cross-sectional (quantitative)                                                                                        | 349 of 601 (58%)                                       | /        | Graduates                                                          | 1                      |
| Stratton et al. <sup>298</sup>     | 2005 | America   | Cross-sectional (quantitative)                                                                                        | 1 314 of 1 911 (69%)                                   | /        | Medical students (4 <sup>th</sup> year of study)                   | 14                     |
| Strelzow et al. <sup>299</sup>     | 2017 | America   | Cross-sectional (quantitative)                                                                                        | Graduates: 23 of 26 (88%); Residents: 139 of 284 (49%) | /        | Applicants + Residents Orthopedics                                 | 1                      |
| Süß et al. <sup>300</sup>          | 2019 | Europe    | Cross-sectional (quantitative)                                                                                        | 101 of 344 (29%)                                       | 1 years  | Residents (child and adolescent psychiatry; trauma surgery)        | 1, 7                   |
| Sutton et al. <sup>301</sup>       | 2014 | Europe    | Cross-sectional (quantitative + qualitative)                                                                          | 482 of / (/)                                           | /        | Medical students (last year of study)                              | 1, 4, 7, 11, 13        |
| Talbot and Ward <sup>302</sup>     | 2000 | Australia | Application observation longitudinal - Alternative Curricular Options in Rural Networks (ACORNS) (quantitative)       | 103 of / (/)                                           | 2 years  | Medical students (4 <sup>th</sup> year of study)                   | 6                      |
| Teclessou et al. <sup>303</sup>    | 2021 | Africa    | Cross-sectional (quantitative)                                                                                        | 251 of 358 (70%)                                       | /        | Medical students (last year of study)                              | 1, 4, 8, 11            |
| Tesche et al. <sup>304</sup>       | 2010 | America   | Application observation longitudinal - Mentored Instruction on High-Fidelity Cardiothoracic Simulators (quantitative) | 44 of 44 (100%)                                        | /        | Medical students (1 <sup>st</sup> + 2 <sup>nd</sup> year of study) | 6                      |

|                                            |      |           |                                                                                        |                                                                                                                                                                        |                  |                                                                          |                |
|--------------------------------------------|------|-----------|----------------------------------------------------------------------------------------|------------------------------------------------------------------------------------------------------------------------------------------------------------------------|------------------|--------------------------------------------------------------------------|----------------|
| Thistlethwaite et al. <sup>305</sup>       | 2008 | Australia | Cross-sectional (qualitative)                                                          | /                                                                                                                                                                      | /                | Medical students; Residents general medicine                             | 1, 7, 13       |
| Thivierge-Southidara et al. <sup>306</sup> | 2022 | America   | Application observation longitudinal - Oversight- Program (quantitative + qualitative) | 84 of 204 (42%)                                                                                                                                                        | /                | Medical students (preclinical years)                                     | 6              |
| Tolhurst and Stewart <sup>307</sup>        | 2005 | Australia | Cross-sectional (qualitative)                                                          | /                                                                                                                                                                      | /                | Medical students (1 <sup>st</sup> year of study)                         | 8, 9, 11, 13   |
| Torrible et al. <sup>308</sup>             | 2006 | America   | Cross-sectional (quantitative)                                                         | 253 of 530 (48%)                                                                                                                                                       | /                | Medical students; Residents internal medicine+ geriatrics; Geriatricians | 1, 4, 6, 7, 13 |
| Turner et al. <sup>309</sup>               | 2006 | Europe    | Longitudinal (quantitative)                                                            | 1 <sup>st</sup> Survey: 24 623 of 33 417 (74%); 2 <sup>nd</sup> Survey: 20 709 of 28 468 (73%)                                                                         | Approx. 29 years | Postgradual training levels                                              | 1, 8           |
| Urbina et al. <sup>310</sup>               | 2003 | America   | Longitudinal (quantitative)                                                            | IG: 213 of 249 (86%); KG: 576 of 684 (84%); total.: 789 of 933 (85%)                                                                                                   | 15 years         | Graduates                                                                | 12             |
| Vaidya et al. <sup>311</sup>               | 2018 | Europe    | Cross-sectional (quantitative)                                                         | University: 27 of 31 (87%); Students: 2672 of 6752 (40%)                                                                                                               | /                | Curriculum- University; Foundation-Year Graduates                        | 12             |
| Vohra et al. <sup>312</sup>                | 2017 | Australia | Cross-sectional (qualitative)                                                          | /                                                                                                                                                                      | /                | Training levels                                                          | 7, 8           |
| Walker et al. <sup>313</sup>               | 2019 | Europe    | Cross-sectional (quantitative)                                                         | 394 of 774 (51%)                                                                                                                                                       | /                | Medical students; Foundation-Year; Residents surgical specialties        | 1, 4, 7, 11    |
| Wendel et al. <sup>314</sup>               | 2003 | America   | Cross-sectional (quantitative)                                                         | 102 of 120 (85%)                                                                                                                                                       | /                | Medical students (last year of study)                                    | 1, 8           |
| Werwick et al. <sup>315</sup>              | 2017 | Europe    | Longitudinal (quantitative + qualitative)                                              | 258 of 373 (69%), 1 <sup>st</sup> Survey: 50 von 60 (83%), 2 <sup>nd</sup> Survey: 37 of 60 (62%), 3 <sup>rd</sup> Survey: 140 of 193 (73%), 4. Survey: 31 of 60 (52%) | /                | Medical students                                                         | 1, 10, 11      |
| Whitaker et al. <sup>316</sup>             | 2020 | America   | Cross-sectional (quantitative)                                                         | 205 of 628 (33%)                                                                                                                                                       | /                | Medical students                                                         | 1, 4, 7        |
| Whittaker et al. <sup>317</sup>            | 2006 | America   | Cross-sectional (quantitative)                                                         | 229 of / (/)                                                                                                                                                           | 8 years          | Medical students                                                         | 1              |
| Wiesenfeld et al. <sup>318</sup>           | 2014 | America   | Cross-sectional (quantitative)                                                         | 60 of 111 (54%)                                                                                                                                                        | /                | Applicants (psychiatry)                                                  | 1, 8, 11, 13   |
| Williamson et al. <sup>319</sup>           | 2003 | Australia | Application observation longitudinal - Rural Health Curriculum (quantitative)          | pre: 87 of / (88%); post: 79 of / (81%)                                                                                                                                | /                | Medical students (5 <sup>th</sup> year of study)                         | 12             |
| Wimsatt et al. <sup>320</sup>              | 2016 | America   | Cross-sectional (quantitative)                                                         | 94 of 111 (85%)                                                                                                                                                        | 2 years          | Curriculum of universities                                               | 1, 4, 5, 6, 7  |
| Woodworth et al. <sup>321</sup>            | 2000 | America   | Cross-sectional (quantitative)                                                         | 258 of 236 (67%)                                                                                                                                                       | /                | Residents (surgery + primary care)                                       | 1, 11          |
| Woolley et al. <sup>322</sup>              | 2019 | Australia | Cross-sectional (quantitative + qualitative)                                           | 180 of 298 (60%); KG: 5 353                                                                                                                                            | /                | Residents                                                                | 1, 4, 7, 8, 12 |
| Wright et al. <sup>323</sup>               | 1997 | America   | Cross-sectional (quantitative)                                                         | 136 of 146 (93%)                                                                                                                                                       | /                | Medical students                                                         | 2, 7           |
| Wu and Greenberg <sup>324</sup>            | 2016 | America   | Application observation longitudinal - Self-Directed Preclinical Course in             | /                                                                                                                                                                      | /                | Medical students (1 <sup>st</sup> + 2 <sup>nd</sup> year of study)       | 6              |

|                                 |      |           |                                                                                                                                    |                                                                                                                              |         |                                                                    |         |
|---------------------------------|------|-----------|------------------------------------------------------------------------------------------------------------------------------------|------------------------------------------------------------------------------------------------------------------------------|---------|--------------------------------------------------------------------|---------|
|                                 |      |           | Ophthalmic Surgery (quantitative + qualitative)                                                                                    |                                                                                                                              |         |                                                                    |         |
| Xu et al. <sup>325</sup>        | 1999 | America   | Cross-sectional (quantitative)                                                                                                     | 1 561 of 2 600 (60%)                                                                                                         | /       | Physicians primary care                                            | 1, 6    |
| Xu et al. <sup>326</sup>        | 1997 | America   | Cross-sectional (quantitative)                                                                                                     | 1 596 of 2 600 (61%)                                                                                                         | /       | Physicians primary care                                            | 1, 7    |
| Yang et al. <sup>327</sup>      | 1994 | America   | Cross-sectional (quantitative)                                                                                                     | Residents: 129 of 378 (34%); Curriculum: 16 of 16 (100%)                                                                     | /       | Residents anesthesia; Curriculum                                   | 1, 7, 8 |
| Yong et al. <sup>328</sup>      | 2012 | America   | Application observation longitudinal - Preclinical course in ophthalmology and ophthalmic Virtual surgery (quantitative)           | 17 of 23 (74%)                                                                                                               | /       | Medical students (1 <sup>st</sup> + 2 <sup>nd</sup> year of study) | 6       |
| Yoon et al. <sup>329</sup>      | 2018 | America   | Longitudinal (quantitative)                                                                                                        | 1 <sup>st</sup> Survey: 564 of 919 (61%); 2 <sup>nd</sup> Survey: 445 of 564 (79%); 3 <sup>rd</sup> Survey: 427 of 445 (96%) | 5 years | Medical students (3 <sup>rd</sup> year of study)                   | 7       |
| Yu et al. <sup>330</sup>        | 2011 | Australia | Cross-sectional (quantitative)                                                                                                     | 268 of 243 (69%)                                                                                                             | /       | Medical students (4 <sup>th</sup> year of study)                   | 1       |
| Zhang et al. <sup>331</sup>     | 2020 | Asia      | Application observation cross-sectional - Supplementary Regional Anatomy Teaching by Surgeons (quantitative)                       | 71 of 71 (100%)                                                                                                              | /       | Medical students (3 <sup>rd</sup> year of study)                   | 12      |
| Ziegler et al. <sup>332</sup>   | 2019 | America   | Application observation cross-sectional - Surgical Exploration and Discovery Program (SEAD) (quantitative + qualitative)           | 25 of 30 (83%)                                                                                                               | /       | Medical students (1 <sup>st</sup> year of study)                   | 6       |
| Zuckerman et al. <sup>333</sup> | 2016 | America   | Application observation longitudinal - Neurosurgery Elective (quantitative + qualitative)                                          | 35 of 35 (100%)                                                                                                              | 2 years | Medical students (1 <sup>st</sup> + 2 <sup>nd</sup> year of study) | 6       |
| Zuzuárregui <sup>334</sup>      | 2015 | America   | Application observation cross-sectional - Comprehensive Opportunities for Research and Teaching Experience (CORTEX) (quantitative) | /                                                                                                                            | /       | Medical students (3 <sup>rd</sup> year of study)                   | 4       |

**Note:** \*: All reference numbers refer to the numbering in [Additional file 2](#).

**Additional file 4: Quality assessment**

**Qualitative observational studies:**

| Quality criterion                       | Alavi et al. [2019] <sup>9*</sup>                                                                                                | Albert et al. [2016] <sup>10</sup>                                                                         | Appleton et al. [2017] <sup>16</sup>                                                                                        | Buddeberg-Fischer et al. [2002] <sup>44</sup>                                                                                                                                                      | Chan et al. [2020] <sup>51</sup>                                                                                                                                                                                                                              |
|-----------------------------------------|----------------------------------------------------------------------------------------------------------------------------------|------------------------------------------------------------------------------------------------------------|-----------------------------------------------------------------------------------------------------------------------------|----------------------------------------------------------------------------------------------------------------------------------------------------------------------------------------------------|---------------------------------------------------------------------------------------------------------------------------------------------------------------------------------------------------------------------------------------------------------------|
| <b>Research question</b>                | Yes                                                                                                                              | Inaccurate                                                                                                 | Yes                                                                                                                         | Yes                                                                                                                                                                                                | Yes                                                                                                                                                                                                                                                           |
| <b>Preregistration</b>                  | No statement                                                                                                                     | No statement                                                                                               | No statement                                                                                                                | No statement                                                                                                                                                                                       | No statement                                                                                                                                                                                                                                                  |
| <b>Methods</b>                          | Yes; no rationale for the study design                                                                                           | Yes                                                                                                        | Yes; measurement bias: different interview lengths                                                                          | Yes; no rationale for the study design                                                                                                                                                             | Yes                                                                                                                                                                                                                                                           |
| <b>Recruitment strategy</b>             | Yes; randomization: none; representativeness: none; selection bias: recruitment from population with general practice preference | Yes; randomization: none; representativeness: none; selection bias: no statements on gender ratio possible | Yes; randomization: none; representativeness: no assessment possible; selection bias: recruitment after quantitative survey | Yes; randomization: random selection with prior stratification; representativeness: no significant differences to the initial population, but no representativeness (authors' statement).          | Yes; randomization: none; representativeness: no assessment possible; selection bias: invitation was made by the head of the study program; measurement bias: different focus group sizes; underrepresentation 3rd year of study, exclusion 1st year of study |
| <b>Follow-up</b>                        | /                                                                                                                                | /                                                                                                          | /                                                                                                                           | /                                                                                                                                                                                                  | /                                                                                                                                                                                                                                                             |
| <b>Data analysis / analysis process</b> | Yes; no pilot testing; bias: remuneration for participation; co-author is member of the review board that approved the study     | Yes; piloted/validated questionnaires                                                                      | Yes; pilot testing; bias: remuneration of participation                                                                     | Yes; no pilot testing/validation                                                                                                                                                                   | Yes; no pilot testing; questions were announced in advance                                                                                                                                                                                                    |
| <b>Results and usefulness</b>           | Qualitative approach was presented as a weakness                                                                                 | Yes; recall bias; low critical consideration of own study                                                  | Yes                                                                                                                         | Confirmation of the results can only be assessed in the further course of the respondents' professional development (snapshot); possible "trend" towards critical assessment of the work situation | Yes                                                                                                                                                                                                                                                           |

| Quality criterion           | Cherry-Bukowiec et al. [2015] <sup>57</sup>                                                                                          | Daniels and Kassam [2011] <sup>72</sup>                                                                              | Firth and Wass [2011] <sup>96</sup>                                                                             | Kerfoot et al. [2005] <sup>156</sup>                                 | Kozar et al. [2004] <sup>162</sup>                                                   |
|-----------------------------|--------------------------------------------------------------------------------------------------------------------------------------|----------------------------------------------------------------------------------------------------------------------|-----------------------------------------------------------------------------------------------------------------|----------------------------------------------------------------------|--------------------------------------------------------------------------------------|
| <b>Research question</b>    | Yes                                                                                                                                  | No clear formulation (only in the abstract)                                                                          | Yes                                                                                                             | Yes                                                                  | Yes                                                                                  |
| <b>Preregistration</b>      | No statement                                                                                                                         | No statement                                                                                                         | No statement                                                                                                    | No statement                                                         | No statement                                                                         |
| <b>Methods</b>              | No (socio-demographic) information on the study population; no justification of the study design.                                    | Yes; measurement bias: different composition and size of focus groups                                                | Yes; no exact description of the time of the survey                                                             | Yes                                                                  | Yes; no justification of study design; measurement bias: different focus group sizes |
| <b>Recruitment strategy</b> | Yes; randomization: none; representativeness: none; selection bias: voluntary choice of acute surgical rotation (= primary interest) | Yes; randomization: none; representativeness: partly (subspecialties, gender - authors' statement), but small sample | Yes; randomization: no; representativeness: none; selection bias: voluntary participation (= primary interest), | Yes; randomization: none; representativeness: no assessment possible | Yes; randomization: none; Representativeness: none                                   |

|                                         |                                                                                                                                          |                       |                                                                                                                                                                                                                                           |                                                                                                                                                                                                                                                        |                                                                        |
|-----------------------------------------|------------------------------------------------------------------------------------------------------------------------------------------|-----------------------|-------------------------------------------------------------------------------------------------------------------------------------------------------------------------------------------------------------------------------------------|--------------------------------------------------------------------------------------------------------------------------------------------------------------------------------------------------------------------------------------------------------|------------------------------------------------------------------------|
|                                         |                                                                                                                                          |                       | different proportions of the individual universities                                                                                                                                                                                      |                                                                                                                                                                                                                                                        |                                                                        |
| <b>Follow-up</b>                        | /                                                                                                                                        | /                     | /                                                                                                                                                                                                                                         | /                                                                                                                                                                                                                                                      | /                                                                      |
| <b>Data analysis / analysis process</b> | Yes; no pilot testing; reporting bias: statements on 2009-2010 cannot be described as impact of rotation, no mention of waste after 2011 | Yes; no pilot testing | Yes; no pilot testing                                                                                                                                                                                                                     | Yes; No pilot testing; "comparison group" did not receive the opposite questions, so that they could relate the questions to further surgical subjects (not only urology) and came from only one specialty (emergency medicine) (possible confounding) | Yes; no pilot testing; no listing of all influencing factors mentioned |
| <b>Results and usefulness</b>           | Yes                                                                                                                                      | Yes                   | Yes; tendency to positive evaluation by pre-clinical participants, (possibly first encounter with a clinical specialty, associated euphoria/enthusiasm for the first clinical experience, no competition from other clinical specialties) | Yes                                                                                                                                                                                                                                                    | Yes; no critical consideration of own study                            |

| <b>Quality criterion</b>                | <b>O'Herrin et al. [2003]<sup>230</sup></b>                                                                 | <b>Parekh et al. [2021]<sup>233</sup></b>                                       | <b>Parker et al. [2014]<sup>234</sup></b>                                                                                                     | <b>Pianosi et al. [2016]<sup>239</sup></b>                                                                                                | <b>Querido et al. [2018]<sup>247</sup></b>                                                                                                  |
|-----------------------------------------|-------------------------------------------------------------------------------------------------------------|---------------------------------------------------------------------------------|-----------------------------------------------------------------------------------------------------------------------------------------------|-------------------------------------------------------------------------------------------------------------------------------------------|---------------------------------------------------------------------------------------------------------------------------------------------|
| <b>Research question</b>                | Yes                                                                                                         | Yes                                                                             | Yes                                                                                                                                           | Yes                                                                                                                                       | Yes                                                                                                                                         |
| <b>Preregistration</b>                  | No statement                                                                                                | No statement                                                                    | No statement                                                                                                                                  | No statement                                                                                                                              | No statement                                                                                                                                |
| <b>Methods</b>                          | Yes; performance bias: allocation to different hospitals and different surgical specialties                 | Yes                                                                             | Yes; performance bias: different support                                                                                                      | Yes                                                                                                                                       | Yes                                                                                                                                         |
| <b>Recruitment strategy</b>             | Yes; randomization: random allocation to the specialties of the surgical rotation; representativeness: none | Yes; randomization: none; representativeness: none (authors' statement)         | Yes; randomization: none; representativeness: partly (age, ethnicity); selection bias: Overrepresentation of female participants              | Inaccurate; randomization: none; representativeness: no assessment possible; selection bias: voluntary participation (= primary interest) | Yes; randomization: none; representativeness: none; selection bias: recruitment during a lecture, overrepresentation of female participants |
| <b>Follow-up</b>                        | /                                                                                                           | 10 month (choice of specialty not included)                                     | /                                                                                                                                             | /                                                                                                                                         | /                                                                                                                                           |
| <b>Data analysis / analysis process</b> | Yes; no pilot testing (logbook entries)                                                                     | Yes; no pilot testing (daily logbook entries); susceptibility to interpretation | Yes; no pilot testing; no application of the principle of data saturation (possibly overlooking influential factors)                          | Yes; pilot testing                                                                                                                        | Yes; pilot testing                                                                                                                          |
| <b>Results and usefulness</b>           | Yes                                                                                                         | Yes                                                                             | Yes; interview questions aimed the question "What influences your view", but in the Conclusion part presented as "Influence on career choice" | Yes                                                                                                                                       | Yes; answer according to social desirability: one of the main authors works as a "medical educator" at the included university              |

| <b>Quality criterion</b> | <b>Russo et al. [2020]<sup>261</sup></b> | <b>Saigal et al. [2007]<sup>265</sup></b> | <b>Scott et al. [2007b]<sup>272</sup></b> | <b>Shipper et al. [2018]<sup>281</sup></b> | <b>Singh and Alberti [2020]<sup>286</sup></b> |
|--------------------------|------------------------------------------|-------------------------------------------|-------------------------------------------|--------------------------------------------|-----------------------------------------------|
| <b>Research question</b> | Yes                                      | Yes                                       | Yes                                       | Yes                                        | Yes                                           |

|                                         |                                                                                                                                                                                                                                                                                                                                                               |                                                                                                                                                                                                                                     |                                                                                                                                                                                                                                                                                               |                                                                                                                  |                                                                                                                    |
|-----------------------------------------|---------------------------------------------------------------------------------------------------------------------------------------------------------------------------------------------------------------------------------------------------------------------------------------------------------------------------------------------------------------|-------------------------------------------------------------------------------------------------------------------------------------------------------------------------------------------------------------------------------------|-----------------------------------------------------------------------------------------------------------------------------------------------------------------------------------------------------------------------------------------------------------------------------------------------|------------------------------------------------------------------------------------------------------------------|--------------------------------------------------------------------------------------------------------------------|
| <b>Preregistration</b>                  | No statement                                                                                                                                                                                                                                                                                                                                                  | No statement                                                                                                                                                                                                                        | No statement                                                                                                                                                                                                                                                                                  | No statement                                                                                                     | No statement                                                                                                       |
| <b>Methods</b>                          | Yes; no socio-demographic information on the sample; measurement bias: no uniform implementation/study clarification                                                                                                                                                                                                                                          | Yes                                                                                                                                                                                                                                 | Yes; measurement bias: different survey times, different survey types (focus group discussions vs. individual interviews)                                                                                                                                                                     | Yes                                                                                                              | Yes                                                                                                                |
| <b>Recruitment strategy</b>             | Yes; randomization: none; representativeness: none; selection bias: only inclusion of training programs of home institutions of members of the research committee of the Association of Directors of Medical Student Education in Psychiatry (ADMSEP), different response rates of the individual included universities, exclusion of international residents | Yes; randomization: none; representativeness: none; selection bias: overrepresentation of clinical students                                                                                                                         | Yes; randomization: none; representativeness: none (authors' statement); selection bias: recruitment on the basis of a previous quantitative survey on career preference, over-representativeness of female participants, recruitment of different years of study from different universities | Yes; randomization: none; representativeness: none; selection bias: voluntary participation (= primary interest) | Yes; randomization: none; representativeness: none; selection bias: over-representativeness of female participants |
| <b>Follow-up</b>                        | /                                                                                                                                                                                                                                                                                                                                                             | /                                                                                                                                                                                                                                   | Up to 4 years (choice of specialty not included)                                                                                                                                                                                                                                              | /                                                                                                                | /                                                                                                                  |
| <b>Data analysis / analysis process</b> | Yes; no pilot testing; strict structured approach according to "Career Construction Theory" may have led to overlooking of important influencing factors                                                                                                                                                                                                      | Yes; pilot testing                                                                                                                                                                                                                  | Yes; no pilot testing                                                                                                                                                                                                                                                                         | Yes; pilot testing                                                                                               | Yes; no pilot testing                                                                                              |
| <b>Results and usefulness</b>           | Yes                                                                                                                                                                                                                                                                                                                                                           | Yes; conflict of interest/response by social desirability: the participating faculty plays a leading role in establishing family medicine in Japan, volunteer participants may have been aware of faculty bias towards primary care | Yes                                                                                                                                                                                                                                                                                           | Yes; response according to social desirability: interview conducted by the course instructors                    | Yes                                                                                                                |

| <b>Quality criterion</b>    | <b>Smith et al. [2017]<sup>289</sup></b>                                                                     | <b>Sorouri et al. [2021]<sup>292</sup></b>                                                                                                     | <b>Sozio et al. [2019]<sup>293</sup></b>                                                                                                                               | <b>Stahn and Harendza [2014]<sup>296</sup></b>           | <b>Thistlethwaite et al. [2008]<sup>305</sup></b>                                                                                                                      |
|-----------------------------|--------------------------------------------------------------------------------------------------------------|------------------------------------------------------------------------------------------------------------------------------------------------|------------------------------------------------------------------------------------------------------------------------------------------------------------------------|----------------------------------------------------------|------------------------------------------------------------------------------------------------------------------------------------------------------------------------|
| <b>Research question</b>    | Yes                                                                                                          | Yes                                                                                                                                            | Yes                                                                                                                                                                    | Yes                                                      | Yes                                                                                                                                                                    |
| <b>Preregistration</b>      | No statement                                                                                                 | No statement                                                                                                                                   | No statement                                                                                                                                                           | No statement                                             | No statement                                                                                                                                                           |
| <b>Methods</b>              | Yes; no justification of the study design; measurement bias: different focus group discussion duration       | Yes; no justification of the study design                                                                                                      | Yes; no socio-demographic information on the sample; no justification of the study design                                                                              | Yes; no justification of the study design                | Yes                                                                                                                                                                    |
| <b>Recruitment strategy</b> | Imprecise (reference to qualitative survey already conducted); randomization: none; representativeness: none | Yes; randomization: none; representativeness: none; selection bias: participation on the basis of a letter of application and primary interest | Yes; randomization: none; representativeness: none; selection bias: Inclusion based on the training universities of the best-certified nephrologists (Top10 faculties) | Imprecise; randomization: none; representativeness: none | Yes; randomization: none; representativeness: none (authors' statement); selection bias: recruitment via selective media, individual institutions/persons and programs |

|                                         |                                                                                                                                                                  |                                                                                                                                                                                                                                                                                                                                |                                                                                                                                                                                                                                                                     |                       |                                                                                                                                                                                                           |
|-----------------------------------------|------------------------------------------------------------------------------------------------------------------------------------------------------------------|--------------------------------------------------------------------------------------------------------------------------------------------------------------------------------------------------------------------------------------------------------------------------------------------------------------------------------|---------------------------------------------------------------------------------------------------------------------------------------------------------------------------------------------------------------------------------------------------------------------|-----------------------|-----------------------------------------------------------------------------------------------------------------------------------------------------------------------------------------------------------|
| <b>Follow-up</b>                        | /                                                                                                                                                                | /                                                                                                                                                                                                                                                                                                                              | /                                                                                                                                                                                                                                                                   | /                     | /                                                                                                                                                                                                         |
| <b>Data analysis / analysis process</b> | Yes; pilot testing; gender-specific approach, but not every gender of the participants was surveyed                                                              | Yes; no pilot testing                                                                                                                                                                                                                                                                                                          | Yes; no pilot testing                                                                                                                                                                                                                                               | Yes; no pilot testing | Yes; no pilot testing                                                                                                                                                                                     |
| <b>Results and usefulness</b>           | Yes; conflict of interest/response according to social desirability: one of the two authors belongs to the group under consideration ("women in medical school") | Yes; response according to social desirability: interview conducted by the author herself; tendency to positive evaluation by preclinical participants, (possibly first encounter with a clinical specialty, associated euphoria/enthusiasm for the first clinical experience, no competition from other clinical specialties) | Yes; response according to social desirability/tendency to positivity: through competitive behavior between faculty at individual universities; university selection based on absolute number of graduates (later certified nephrologists), not on percentage share | Yes                   | Yes; Conflict of interest: study was funded by a grant from the "Australian Primary Health Care Research Institute"; Recall bias: increasing bias with increasing time distance from the end of the study |

|                                         |                                                                                                                                                                                                             |                                                                                                                                                                      |  |  |  |
|-----------------------------------------|-------------------------------------------------------------------------------------------------------------------------------------------------------------------------------------------------------------|----------------------------------------------------------------------------------------------------------------------------------------------------------------------|--|--|--|
| <b>Quality criterion</b>                | <b>Tolhurst and Stewart [2005]<sup>307</sup></b>                                                                                                                                                            | <b>Vohra et al. [2019]<sup>312</sup></b>                                                                                                                             |  |  |  |
| <b>Research question</b>                | No clear formulation (only in the abstract)                                                                                                                                                                 | No clear formulation (only in the abstract)                                                                                                                          |  |  |  |
| <b>Preregistration</b>                  | No statement                                                                                                                                                                                                | No statement                                                                                                                                                         |  |  |  |
| <b>Methods</b>                          | Yes; measurement bias: different sizes, discussion duration and gender composition (moderators) of the focus group discussions; no justification of the study design                                        | Yes; measurement bias: different survey forms: telephone, web-based or "face-to-face", no uniform data collection; no justification of the study design              |  |  |  |
| <b>Recruitment strategy</b>             | Yes; randomization: none; representativeness: none; selection bias: partly recruitment from a student conference on the topic of "Rural Conference" (primary interest), no information on group composition | Yes; randomization: none; representativeness: none; confounding: mainly general practitioners and residents from private group practices in regional and urban areas |  |  |  |
| <b>Follow-up</b>                        | /                                                                                                                                                                                                           | /                                                                                                                                                                    |  |  |  |
| <b>Data analysis / analysis process</b> | Yes; no pilot testing                                                                                                                                                                                       | Yes; no pilot testing                                                                                                                                                |  |  |  |
| <b>Results and usefulness</b>           | Yes; no critical consideration of own study                                                                                                                                                                 | Yes; no critical consideration of own study                                                                                                                          |  |  |  |

**Quantitative and quantitative + qualitative observational studies:**

| Quality criterion                                                       | Abendroth et al. [2014] <sup>1</sup>                                                                                                                                                                                        | Admani et al. [2014] <sup>2</sup>                                                                                                                                                     | Ahsin and Saeed [2016] <sup>3</sup>                                                                                          | Al Salehi et al. [2019] <sup>4</sup>                                                                                                                                                                                          | Al-Asnag and Jan [2002] <sup>5</sup>                                                                                                                                                                                                              |
|-------------------------------------------------------------------------|-----------------------------------------------------------------------------------------------------------------------------------------------------------------------------------------------------------------------------|---------------------------------------------------------------------------------------------------------------------------------------------------------------------------------------|------------------------------------------------------------------------------------------------------------------------------|-------------------------------------------------------------------------------------------------------------------------------------------------------------------------------------------------------------------------------|---------------------------------------------------------------------------------------------------------------------------------------------------------------------------------------------------------------------------------------------------|
| <b>Research question</b>                                                | Yes                                                                                                                                                                                                                         | Yes                                                                                                                                                                                   | Yes                                                                                                                          | Yes                                                                                                                                                                                                                           | Yes                                                                                                                                                                                                                                               |
| <b>Preregistration</b>                                                  | No statement                                                                                                                                                                                                                | No statement                                                                                                                                                                          | No statement                                                                                                                 | No statement                                                                                                                                                                                                                  | No statement                                                                                                                                                                                                                                      |
| <b>Study-population</b>                                                 | Yes; low representation of the recruitment strategy; randomization: none; representativeness: none (authors' statement); selection bias: response rate <50%, possible differences between "responders" and "non-responders" | Yes; randomization: none; representativeness: no assessment possible; selection bias: no socio-demographic information on the sample; recruitment at a national professional congress | Yes; randomization: none; representativeness: none; selection bias/confounding: overrepresentation of the last year of study | Yes; randomization: no assessment possible; representativeness: none; selection bias: different response rates/proportions of graduates from the individual universities; no precise description of the recruitment strategy; | Yes; randomization: none; representativeness: none                                                                                                                                                                                                |
| <b>Exposition and outcome</b>                                           | Yes                                                                                                                                                                                                                         | Yes                                                                                                                                                                                   | Yes                                                                                                                          | Yes                                                                                                                                                                                                                           | Yes                                                                                                                                                                                                                                               |
| <b>Exposure measure(s), exposure levels</b>                             | Yes                                                                                                                                                                                                                         | Yes                                                                                                                                                                                   | Yes                                                                                                                          | Yes                                                                                                                                                                                                                           | Yes                                                                                                                                                                                                                                               |
| <b>Definition of result, result measurement, number of measurements</b> | Yes; no pilot testing                                                                                                                                                                                                       | Yes; no pilot testing                                                                                                                                                                 | Yes; pilot testing                                                                                                           | Yes; no pilot testing                                                                                                                                                                                                         | Yes; no pilot testing                                                                                                                                                                                                                             |
| <b>Follow-up</b>                                                        | /                                                                                                                                                                                                                           | /                                                                                                                                                                                     | /                                                                                                                            | /                                                                                                                                                                                                                             | Start to end of rotation (choice of specialty not included)                                                                                                                                                                                       |
| <b>Statistical analysis and limitations</b>                             | Yes                                                                                                                                                                                                                         | Only indication of absolute and relative frequencies                                                                                                                                  | Only indication of absolute and relative frequencies; no critical consideration of own study                                 | Only indication of absolute and relative frequencies                                                                                                                                                                          | Yes; only a small proportion of the pre- and post-survey groups contained the same participants: low significance; the methodology mentions the statistical evaluation using the OR and the corresponding AI, but the OR is missing from the text |

| Quality criterion                           | Al-Jaeed et al. [2021] <sup>6</sup>                                                                                                                                                     | Al-Mendalawi [2010] <sup>7</sup>                                        | Al-Nuaimi et al. [2008] <sup>8</sup>                                                                                                             | Alberti et al. [2017] <sup>11</sup>                                                                                                                                                                                                           | Alkatout et al. [2021] <sup>12</sup>                                                                                                                             |
|---------------------------------------------|-----------------------------------------------------------------------------------------------------------------------------------------------------------------------------------------|-------------------------------------------------------------------------|--------------------------------------------------------------------------------------------------------------------------------------------------|-----------------------------------------------------------------------------------------------------------------------------------------------------------------------------------------------------------------------------------------------|------------------------------------------------------------------------------------------------------------------------------------------------------------------|
| <b>Research question</b>                    | Yes                                                                                                                                                                                     | Yes                                                                     | Yes                                                                                                                                              | Yes                                                                                                                                                                                                                                           | Yes                                                                                                                                                              |
| <b>Preregistration</b>                      | No statement                                                                                                                                                                            | No statement                                                            | No statement                                                                                                                                     | No statement                                                                                                                                                                                                                                  | No statement                                                                                                                                                     |
| <b>Study-population</b>                     | Yes; randomization: none; representativeness: partly (necessary sample size was calculated beforehand); selection bias: >50% of the participants from the 2nd and 3rd year of the study | Yes; randomization: none; representativeness: none (authors' statement) | Yes; randomization: none; representativeness: given (authors' statement); selection bias: 1/3 of the participants from the 1st year of the study | Yes; randomization: none; representativeness: given; selection bias: possibly universities that are known to produce many general practitioners attract more students who already show a strong interest in general practice at the beginning | Yes; randomization: none; representativeness: none; selection bias: over-representativeness of female participants, voluntary participation (= primary interest) |
| <b>Exposition and outcome</b>               | Yes                                                                                                                                                                                     | Yes                                                                     | Yes                                                                                                                                              | Yes                                                                                                                                                                                                                                           | Yes                                                                                                                                                              |
| <b>Exposure measure(s), exposure levels</b> | Yes                                                                                                                                                                                     | Yes                                                                     | Yes                                                                                                                                              | Yes; no precise description of what was captured by the questionnaire for the                                                                                                                                                                 | Yes                                                                                                                                                              |

|                                                                         |                                                                                                                               |                                                                        |                                             |                                                                                                 |                                                                                                                                                                                                                                           |
|-------------------------------------------------------------------------|-------------------------------------------------------------------------------------------------------------------------------|------------------------------------------------------------------------|---------------------------------------------|-------------------------------------------------------------------------------------------------|-------------------------------------------------------------------------------------------------------------------------------------------------------------------------------------------------------------------------------------------|
|                                                                         |                                                                                                                               |                                                                        |                                             | universities; no definition given for "authentic teaching" (= susceptibility to interpretation) |                                                                                                                                                                                                                                           |
| <b>Definition of result, result measurement, number of measurements</b> | Yes; pilot testing                                                                                                            | No detailed presentation of the measuring instrument; no pilot testing | Yes; no pilot testing                       | Yes; no pilot testing                                                                           | Yes; no pilot testing                                                                                                                                                                                                                     |
| <b>Follow-up</b>                                                        | /                                                                                                                             | /                                                                      | /                                           | /                                                                                               | /                                                                                                                                                                                                                                         |
| <b>Statistical analysis and limitations</b>                             | Yes; confounding: Results linked to curricular requirements of the respective study years (overrepresentation 2nd study year) | Yes                                                                    | Yes; no critical consideration of own study | Yes                                                                                             | Yes; tendency to positive evaluation by pre-clinical participants, (possibly first encounter with a clinical specialty, associated euphoria/enthusiasm for the first clinical experience, no competition from other clinical specialties) |

| <b>Quality criterion</b>                                                | <b>Amalba et al. [2016]<sup>13</sup></b>                                                                            | <b>Ambrozy et al. [1997]<sup>14</sup></b>                                                                                                                                                                             | <b>Andlauer et al. [2012]<sup>15</sup></b>                                                                                                                                                                        | <b>Are et al. [2018]<sup>17</sup></b>                                                                                                                                                                                                                                                   | <b>Arleo et al. [2016]<sup>18</sup></b>                                                                                                                                                     |
|-------------------------------------------------------------------------|---------------------------------------------------------------------------------------------------------------------|-----------------------------------------------------------------------------------------------------------------------------------------------------------------------------------------------------------------------|-------------------------------------------------------------------------------------------------------------------------------------------------------------------------------------------------------------------|-----------------------------------------------------------------------------------------------------------------------------------------------------------------------------------------------------------------------------------------------------------------------------------------|---------------------------------------------------------------------------------------------------------------------------------------------------------------------------------------------|
| <b>Research question</b>                                                | Ja                                                                                                                  | Ja                                                                                                                                                                                                                    | Ja                                                                                                                                                                                                                | Ja                                                                                                                                                                                                                                                                                      | Ja                                                                                                                                                                                          |
| <b>Preregistration</b>                                                  | No statement                                                                                                        | No statement                                                                                                                                                                                                          | No statement                                                                                                                                                                                                      | No statement                                                                                                                                                                                                                                                                            | No statement                                                                                                                                                                                |
| <b>Study-population</b>                                                 | Yes; randomization: none; representativeness: none; selection bias: higher proportion 4 <sup>th</sup> year of study | Yes; randomization: none; representativeness: no assessment possible; no precise description of the recruitment strategy (reference to another study); selection bias: no socio-demographic information on the sample | Yes; randomization: none; representativeness: none; selection bias: research objective was announced before the survey, so that more students with a primary interest in the subject area may have felt addressed | Yes; randomization: none; representativeness: given (authors' statement); selection bias: 1st university higher proportion of female participants each year, 2nd university higher proportion of male participants each year, higher response rates for the 1st and final year of study | Yes; randomization: none; representativeness: given (authors' statement); selection bias: only inclusion of universities listed in the "Alliance of Medical Student Educators in Radiology" |
| <b>Exposition and outcome</b>                                           | Yes                                                                                                                 | Yes                                                                                                                                                                                                                   | Yes                                                                                                                                                                                                               | Yes                                                                                                                                                                                                                                                                                     | Yes                                                                                                                                                                                         |
| <b>Exposure measure(s), exposure levels</b>                             | Yes                                                                                                                 | Yes                                                                                                                                                                                                                   | Yes                                                                                                                                                                                                               | Yes; performance bias/confounding: possible differences between included universities                                                                                                                                                                                                   | Yes; performance bias/confounding: differences between the included universities with regard to supervision                                                                                 |
| <b>Definition of result, result measurement, number of measurements</b> | Yes; pilot testing                                                                                                  | Yes; pilot testing                                                                                                                                                                                                    | Yes; no pilot testing, and use of an already validated test (ATP-30) and "International English Big Five Mini-Markers"                                                                                            | Yes; multiple interviews: 4 times; pilot testing                                                                                                                                                                                                                                        | Yes; no pilot testing                                                                                                                                                                       |
| <b>Follow-up</b>                                                        | /                                                                                                                   | /                                                                                                                                                                                                                     | /                                                                                                                                                                                                                 | 4 years (1 <sup>st</sup> – 4 <sup>th</sup> year of study) (choice of specialty included)                                                                                                                                                                                                | /                                                                                                                                                                                           |
| <b>Statistical analysis and limitations</b>                             | Yes                                                                                                                 | Yes                                                                                                                                                                                                                   | Yes                                                                                                                                                                                                               | Only indication of absolute and relative frequencies; no critical consideration of own study                                                                                                                                                                                            | Yes                                                                                                                                                                                         |

| <b>Quality criterion</b> | <b>Asaad et al. [2020]<sup>19</sup></b> | <b>Atalabi et al. [2013]<sup>20</sup></b> | <b>Azizzadeh et al. [2003]<sup>21</sup></b> | <b>Balogun and Adebayo [2019]<sup>22</sup></b> | <b>Barat et al. [2019]<sup>23</sup></b> |
|--------------------------|-----------------------------------------|-------------------------------------------|---------------------------------------------|------------------------------------------------|-----------------------------------------|
|--------------------------|-----------------------------------------|-------------------------------------------|---------------------------------------------|------------------------------------------------|-----------------------------------------|

|                                                                         |                                                                         |                                                                                      |                                                                                                                                          |                                                                                                                                                                           |                                                                                                                      |
|-------------------------------------------------------------------------|-------------------------------------------------------------------------|--------------------------------------------------------------------------------------|------------------------------------------------------------------------------------------------------------------------------------------|---------------------------------------------------------------------------------------------------------------------------------------------------------------------------|----------------------------------------------------------------------------------------------------------------------|
| <b>Research question</b>                                                | Yes                                                                     | Yes                                                                                  | Yes                                                                                                                                      | Yes                                                                                                                                                                       | Yes                                                                                                                  |
| <b>Preregistration</b>                                                  | No statement                                                            | No statement                                                                         | No statement                                                                                                                             | No statement                                                                                                                                                              | No statement                                                                                                         |
| <b>Study-population</b>                                                 | Yes; randomization: none; representativeness: none (authors' statement) | Yes; randomization: random selection 10 of 12 "classrooms"; representativeness: none | Yes; randomization: none; representativeness: none; selection bias: no statements on gender ratio possible, since 32 without gender data | Yes; randomization: none; representativeness: no assessment possible; selection bias: recruitment of participants in the lecture hall (primarily more committed students) | Yes; randomization: none; representativeness: partly; selection bias: no socio-demographic information on the sample |
| <b>Exposition and outcome</b>                                           | Yes                                                                     | Yes                                                                                  | Yes                                                                                                                                      | Yes                                                                                                                                                                       | Yes                                                                                                                  |
| <b>Exposure measure(s), exposure levels</b>                             | Yes                                                                     | Yes; no exact listing of the surveyed influencing factors                            | Yes                                                                                                                                      | Yes                                                                                                                                                                       | Yes                                                                                                                  |
| <b>Definition of result, result measurement, number of measurements</b> | Yes; pilot testing                                                      | Yes; no pilot testing                                                                | Yes; no pilot testing                                                                                                                    | Yes; use of a questionnaire from a previous study (no information on possible pilot testing)                                                                              | Yes; no pilot testing; multiple surveys: 1st, 3rd and 5th postgraduate year, as well as after 10 years               |
| <b>Follow-up</b>                                                        | /                                                                       | /                                                                                    | /                                                                                                                                        | /                                                                                                                                                                         | Up to 10 years (choice of specialty included)                                                                        |
| <b>Statistical analysis and limitations</b>                             | Yes                                                                     | Yes                                                                                  | Yes; low critical consideration of own study                                                                                             | Yes                                                                                                                                                                       | Yes                                                                                                                  |

| <b>Quality criterion</b>                                                | <b>Barber et al. [2018]<sup>24</sup></b>                                                                                                                | <b>Bauer et al. [2016]<sup>26</sup></b>                                                                                                                                                                                    | <b>Bédard et al. [2006]<sup>27</sup></b>                                                                                                                                                                                                                         | <b>Beier et al. [2015]<sup>28</sup></b>                                                                                                                                                                                   | <b>Berger et al. [2017]<sup>29</sup></b>                                                                                                                                               |
|-------------------------------------------------------------------------|---------------------------------------------------------------------------------------------------------------------------------------------------------|----------------------------------------------------------------------------------------------------------------------------------------------------------------------------------------------------------------------------|------------------------------------------------------------------------------------------------------------------------------------------------------------------------------------------------------------------------------------------------------------------|---------------------------------------------------------------------------------------------------------------------------------------------------------------------------------------------------------------------------|----------------------------------------------------------------------------------------------------------------------------------------------------------------------------------------|
| <b>Research question</b>                                                | Yes                                                                                                                                                     | Yes                                                                                                                                                                                                                        | Yes                                                                                                                                                                                                                                                              | Yes                                                                                                                                                                                                                       | Yes                                                                                                                                                                                    |
| <b>Preregistration</b>                                                  | No statement                                                                                                                                            | No statement                                                                                                                                                                                                               | No statement                                                                                                                                                                                                                                                     | No statement                                                                                                                                                                                                              | No statement                                                                                                                                                                           |
| <b>Study-population</b>                                                 | Yes; randomization: none; representativeness: no assessment possible; selection bias: no information on the proportions of the two included study years | Yes; randomization: none; representativeness: no assessment possible; no information on recruitment strategy; selection bias: no socio-demographic information on the sample, voluntary participation (= primary interest) | Yes; randomization: none; representativeness: none; selection bias: differences in the response rate of the individual included universities, no information on the gender ratio, different settings for data collection (in part, few academic events attended) | Yes; randomization: none; Representativeness: no assessment possible; Selection bias: "Classical (macro) suture course as a prerequisite for participation (= primary interest), overrepresentation of the clinical phase | Yes; randomization: none; representativeness: none; no statements on recruitment strategy (reference to another study); no mention of the included university (only in the final part) |
| <b>Exposition and outcome</b>                                           | Yes                                                                                                                                                     | Yes                                                                                                                                                                                                                        | Yes                                                                                                                                                                                                                                                              | Yes                                                                                                                                                                                                                       | Yes                                                                                                                                                                                    |
| <b>Exposure measure(s), exposure levels</b>                             | Yes                                                                                                                                                     | Yes; performance bias: no uniform implementation (differences in the order of the workshop stations)                                                                                                                       | Yes; performance bias/confounding: possible differences between included universities                                                                                                                                                                            | Yes; performance bias: no uniform implementation (different supervision)                                                                                                                                                  | Yes; performance bias: possible differences between the included universities                                                                                                          |
| <b>Definition of result, result measurement, number of measurements</b> | Yes; pilot testing; measurement bias: differences in the time interval between general practice block and survey                                        | Yes; no pilot testing; multiple interviews: before and after "intervention"                                                                                                                                                | Yes; pilot testing; multiple interviews: after pre-clinic and at the end of the internship                                                                                                                                                                       | Yes; no pilot testing                                                                                                                                                                                                     | Yes; no pilot testing                                                                                                                                                                  |
| <b>Follow-up</b>                                                        | /                                                                                                                                                       | /                                                                                                                                                                                                                          | 2 years (choice of specialty included)                                                                                                                                                                                                                           | /                                                                                                                                                                                                                         | 3 years (choice of specialty included)                                                                                                                                                 |
| <b>Statistical analysis and limitations</b>                             | Yes; possible distortion of the results, due to temporal proximity of the general medical block and the survey for some participants                    | Yes; low critical consideration on own study                                                                                                                                                                               | Yes; significant difference between "responders" and "non-responders"                                                                                                                                                                                            | Yes; recall bias: survey on "attitude" or subject area preference before the course was subsequently collected after the course; subjective                                                                               | Yes; Confounding: Curriculum change over the course of the study in one cohort                                                                                                         |

|  |  |  |  |                                                                                      |  |
|--|--|--|--|--------------------------------------------------------------------------------------|--|
|  |  |  |  | assessment of the increase in competence; no critical consideration of the own study |  |
|--|--|--|--|--------------------------------------------------------------------------------------|--|

| Quality criterion                                                       | Bhat et al. [2012] <sup>30</sup>                                                               | Bhutta et al. [2016] <sup>31</sup>                                                                                                                                          | Bien et al. [2019] <sup>32</sup>                                                                                                                                                | Blatt et al. [2022] <sup>33</sup>                                                                                                               | Blue et al. [1996] <sup>34</sup>                                                                             |
|-------------------------------------------------------------------------|------------------------------------------------------------------------------------------------|-----------------------------------------------------------------------------------------------------------------------------------------------------------------------------|---------------------------------------------------------------------------------------------------------------------------------------------------------------------------------|-------------------------------------------------------------------------------------------------------------------------------------------------|--------------------------------------------------------------------------------------------------------------|
| <b>Research question</b>                                                | No clear formulation (only in the abstract)                                                    | Yes                                                                                                                                                                         | Yes                                                                                                                                                                             | Yes                                                                                                                                             | Yes                                                                                                          |
| <b>Preregistration</b>                                                  | No statement                                                                                   | No statement                                                                                                                                                                | No statement                                                                                                                                                                    | No statement                                                                                                                                    | No statement                                                                                                 |
| <b>Study-population</b>                                                 | Yes; randomization: random selection from the register of assistants; representativeness: none | Yes; randomization: none; representativeness: no assessment possible; selection bias: recruitment on 5 different events (= primary interest); no indication of gender ratio | Yes; randomization: none; representativeness: no assessment possible; selection bias: differences in the proportions and response rates of the individual included universities | Yes; randomization: none; representativeness: none; selection bias: voluntary participation (= primary interest), no indication of gender ratio | Yes; randomization: none; representativeness: no assessment possible; overrepresentation of general practice |
| <b>Exposition and outcome</b>                                           | Yes (short in methods)                                                                         | Yes                                                                                                                                                                         | Yes                                                                                                                                                                             | Yes                                                                                                                                             | Yes                                                                                                          |
| <b>Exposure measure(s), exposure levels</b>                             | Yes; no presentation/listing of all investigated influencing factors                           | Yes; performance bias: differences in study careers                                                                                                                         | Yes; no description of the individual university general medicine courses; performance bias: possible differences between the included universities                             | Yes                                                                                                                                             | Yes; performance bias: due to possible curricular changes, changes in the teaching staff                     |
| <b>Definition of result, result measurement, number of measurements</b> | Yes; no pilot testing; no presentation/listing of all subject areas examined                   | Yes; pilot testing                                                                                                                                                          | Yes; pilot testing; measurement bias: no uniform implementation                                                                                                                 | Yes; no pilot testing                                                                                                                           | Yes; no pilot testing                                                                                        |
| <b>Follow-up</b>                                                        | /                                                                                              | /                                                                                                                                                                           | /                                                                                                                                                                               | /                                                                                                                                               | /                                                                                                            |
| <b>Statistical analysis and limitations</b>                             | Yes; no critical consideration of own study                                                    | Yes                                                                                                                                                                         | Yes; answering according to social desirability: announcement of the study objective before the interview                                                                       | Only indication of absolute and relative frequencies; no critical consideration of own study                                                    | Yes; recall bias: increases with the number of years between the end of the study and the survey             |

| Quality criterion                           | Bobo et al. [2009] <sup>35</sup>                                                                                                                                                                                                           | Bolger et al. [2015] <sup>36</sup>                                                                                                                | Bonura et al. [2016] <sup>37</sup>                                                                                                                                                                                                                        | Borges et al. [2009] <sup>38</sup>                                                              | Boyd et al. [2009] <sup>39</sup>                                                                                                                                                          |
|---------------------------------------------|--------------------------------------------------------------------------------------------------------------------------------------------------------------------------------------------------------------------------------------------|---------------------------------------------------------------------------------------------------------------------------------------------------|-----------------------------------------------------------------------------------------------------------------------------------------------------------------------------------------------------------------------------------------------------------|-------------------------------------------------------------------------------------------------|-------------------------------------------------------------------------------------------------------------------------------------------------------------------------------------------|
| <b>Research question</b>                    | Yes                                                                                                                                                                                                                                        | Yes                                                                                                                                               | Yes                                                                                                                                                                                                                                                       | Yes                                                                                             | Yes                                                                                                                                                                                       |
| <b>Preregistration</b>                      | No statement                                                                                                                                                                                                                               | No statement                                                                                                                                      | No statement                                                                                                                                                                                                                                              | No statement                                                                                    | No statement                                                                                                                                                                              |
| <b>Study-population</b>                     | Yes; randomization: administrative allocation of students to the individual psychiatric rotation areas; representativeness: none; selection bias: over-representativeness of male participants (decrease in participants over the 5 years) | Yes; randomization: none; representativeness: no assessment possible; selection bias: no information on recruitment strategy, clinical phase only | Yes; randomization: none; representativeness: given (authors' statement); multiple stratification levels; selection bias: differences in response rates for spring and autumn; significantly higher proportion of participants from the north-east region | Little information on the sample and methodology; randomization: none; representativeness: none | Yes; randomization: none; representativeness: partial; selection bias: underrepresentation of emergency medicine, cluster effect due to different proportions from different universities |
| <b>Exposition and outcome</b>               | Yes                                                                                                                                                                                                                                        | Yes                                                                                                                                               | Yes                                                                                                                                                                                                                                                       | Yes                                                                                             | Yes                                                                                                                                                                                       |
| <b>Exposure measure(s), exposure levels</b> | Yes                                                                                                                                                                                                                                        | Yes                                                                                                                                               | Yes; performance bias: differences in training programs                                                                                                                                                                                                   | Yes                                                                                             | Yes                                                                                                                                                                                       |

|                                                                         |                                                                                                                                                                                                                              |                                                        |                                                                                                                                                                                                                                                                                                                                                                                                               |                                                                                                                               |                                                                                                                                                                                                                    |
|-------------------------------------------------------------------------|------------------------------------------------------------------------------------------------------------------------------------------------------------------------------------------------------------------------------|--------------------------------------------------------|---------------------------------------------------------------------------------------------------------------------------------------------------------------------------------------------------------------------------------------------------------------------------------------------------------------------------------------------------------------------------------------------------------------|-------------------------------------------------------------------------------------------------------------------------------|--------------------------------------------------------------------------------------------------------------------------------------------------------------------------------------------------------------------|
| <b>Definition of result, result measurement, number of measurements</b> | Yes; no pilot testing and use of existing questionnaires/test forms: performance data consisted of standardized NBME (National Board of Medical Examiners) examination results; measurement bias: no uniform data collection | Yes; use of an already piloted/validated questionnaire | Yes; no pilot testing                                                                                                                                                                                                                                                                                                                                                                                         | Yes; no pilot testing; measurement bias: no uniform data collection (different survey times and settings)                     | Yes; use of already piloted/validated questionnaires (Graduation Questionnaire (GQ) of the Association of American Medical Colleges = AAMC); measurement bias: differences in the surroundings of the universities |
| <b>Follow-up</b>                                                        | /                                                                                                                                                                                                                            | /                                                      | /                                                                                                                                                                                                                                                                                                                                                                                                             | /                                                                                                                             | /                                                                                                                                                                                                                  |
| <b>Statistical analysis and limitations</b>                             | Yes; changes in NBME scoring system over time, results before 1999/2000 had to be partially standardized using z-scores, NBME standard scores and means and standard deviations (SD)                                         | Yes; no critical consideration of own study            | Yes; confounding and influence of different training programs: showed no significance; limitation: spring cohort may already have had a final career plan, while the autumn cohort did not until later, size of graduating class estimated; recall bias: increased with the interval between the end of studies and the survey; conflict of interest: support from the Infectious Diseases Society of America | Yes; bias/confounding: setting of data collection (e.g. following final exams); low critical consideration of one's own study | Yes; bias: categorically collected data were numerically coded in this secondary analysis of the data; insufficient definition of the influencing factor: "controllable lifestyle"                                 |

| Quality criterion                                                       | Boyle et al. [2014] <sup>40</sup>                                                                                        | Briggs et al. [2006] <sup>41</sup>                                                                                  | Brooks et al. [2016] <sup>42</sup>                                                                                                                                                           | Brown et al. [2015] <sup>43</sup>                                                                                                                             | Burack et al. [1997] <sup>45</sup>                                       |
|-------------------------------------------------------------------------|--------------------------------------------------------------------------------------------------------------------------|---------------------------------------------------------------------------------------------------------------------|----------------------------------------------------------------------------------------------------------------------------------------------------------------------------------------------|---------------------------------------------------------------------------------------------------------------------------------------------------------------|--------------------------------------------------------------------------|
| <b>Research question</b>                                                | Yes                                                                                                                      | No clear formulation (only in the abstract)                                                                         | Yes                                                                                                                                                                                          | Yes                                                                                                                                                           | Yes                                                                      |
| <b>Preregistration</b>                                                  | No statement                                                                                                             | No statement                                                                                                        | No statement                                                                                                                                                                                 | No statement                                                                                                                                                  | No statement                                                             |
| <b>Study-population</b>                                                 | Low; randomization: none; representativeness: no assessment possible; no precise description of the recruitment strategy | Yes; randomization: none; representativeness: no assessment possible; selection bias: no indication of gender ratio | Yes; randomization: none; representativeness: none; selection bias: recruitment through selection interviews, voluntary participation (= primary interest), high participation fee of course | Yes; randomization: none; representativeness: none; selection bias: in Swansea, study is only possible after previous psychology-associated training or study | Yes; randomization: none; representativeness: given (authors' statement) |
| <b>Exposition and outcome</b>                                           | Yes                                                                                                                      | Yes                                                                                                                 | Yes                                                                                                                                                                                          | Yes                                                                                                                                                           | Yes                                                                      |
| <b>Exposure measure(s), exposure levels</b>                             | Yes                                                                                                                      | Yes; no exact representation/listing of all influencing factors examined                                            | Yes                                                                                                                                                                                          | Yes                                                                                                                                                           | Yes                                                                      |
| <b>Definition of result, result measurement, number of measurements</b> | Yes; no pilot testing                                                                                                    | Yes; no pilot testing                                                                                               | Yes; valid information on the choice of specialist doctor                                                                                                                                    | Yes; pilot testing of quantitative measurement instrument                                                                                                     | Yes; pilot testing/validation of quantitative measurement instrument     |
| <b>Follow-up</b>                                                        | /                                                                                                                        | /                                                                                                                   | /                                                                                                                                                                                            | /                                                                                                                                                             | /                                                                        |
| <b>Statistical analysis and limitations</b>                             | Yes                                                                                                                      | Only indication of absolute and relative frequencies; no agreement of calculated                                    | Only indication of absolute and relative frequencies                                                                                                                                         | Yes; bias: one participant took part in the focus group discussions (qualitative data), which served to prepare the                                           | Yes; possible bias of the examiner, as well as freedom of interpretation |

|  |  |                                                |  |                                                                                                                   |  |
|--|--|------------------------------------------------|--|-------------------------------------------------------------------------------------------------------------------|--|
|  |  | response rate with the indicated response rate |  | questionnaire, without having any experience of the "short learning opportunities in the clinical setting" (LOCS) |  |
|--|--|------------------------------------------------|--|-------------------------------------------------------------------------------------------------------------------|--|

| Quality criterion                                                | Calligaro and Dougherty [2006] <sup>46</sup>                                                                                                                       | Campos-Outcalt et al. [2004] <sup>47</sup>                                                                                                                                                                                                                       | Carmichael et al. [2020] <sup>48</sup>                                                                                                                                                                                                    | Celenza et al. [2012] <sup>49</sup>                                                                                                                             | Chan et al. [2016] <sup>50</sup>                                                                                              |
|------------------------------------------------------------------|--------------------------------------------------------------------------------------------------------------------------------------------------------------------|------------------------------------------------------------------------------------------------------------------------------------------------------------------------------------------------------------------------------------------------------------------|-------------------------------------------------------------------------------------------------------------------------------------------------------------------------------------------------------------------------------------------|-----------------------------------------------------------------------------------------------------------------------------------------------------------------|-------------------------------------------------------------------------------------------------------------------------------|
| Research question                                                | Yes                                                                                                                                                                | Yes                                                                                                                                                                                                                                                              | Yes                                                                                                                                                                                                                                       | Yes                                                                                                                                                             | Yes                                                                                                                           |
| Preregistration                                                  | No statement                                                                                                                                                       | No statement                                                                                                                                                                                                                                                     | No statement                                                                                                                                                                                                                              | No statement                                                                                                                                                    | No statement                                                                                                                  |
| Study-population                                                 | Yes; randomization: none; representativeness: none (authors' statement); selection bias: no information on gender ratio, higher proportion of medical participants | Yes; randomization: none; representativeness: partly; selection bias: inclusion of the first 12 universities with increasing or decreasing numbers of applicants for general practice; differences in the response rates of the individual included universities | Yes; randomization: none; representativeness: none                                                                                                                                                                                        | Yes; randomization: none; representativeness: none; selection bias: primary interest in the subject studied, differences in sex ratios among groups             | Yes; randomization: none; representativeness: no assessment possible; selection bias: overrepresentation of male participants |
| Exposition and outcome                                           | Yes                                                                                                                                                                | Yes                                                                                                                                                                                                                                                              | Yes                                                                                                                                                                                                                                       | Yes                                                                                                                                                             | Yes                                                                                                                           |
| Exposure measure(s), exposure levels                             | Yes                                                                                                                                                                | Yes; performance bias/confounding: possible differences between included universities                                                                                                                                                                            | Yes                                                                                                                                                                                                                                       | Yes                                                                                                                                                             | Yes                                                                                                                           |
| Definition of result, result measurement, number of measurements | Yes; no pilot testing                                                                                                                                              | Yes; pilot testing                                                                                                                                                                                                                                               | Yes; no pilot testing                                                                                                                                                                                                                     | Yes; pilot testing/validation; different questionnaires and number of data collection for the different groups (questionnaire of students significantly larger) | Yes; pilot testing                                                                                                            |
| Follow-up                                                        | /                                                                                                                                                                  | /                                                                                                                                                                                                                                                                | /                                                                                                                                                                                                                                         | /                                                                                                                                                               | /                                                                                                                             |
| Statistical analysis and limitations                             | Yes                                                                                                                                                                | Low; no information on the included years                                                                                                                                                                                                                        | Yes; tendency to positive evaluation by pre-clinical participants, (possibly first encounter with a clinical specialty, associated euphoria/enthusiasm for the first clinical experience, no competition from other clinical specialties) | Yes; answer according to social desirability, as some of the participants were colleagues of the authors                                                        | Yes; answering according to social desirability: negative statements are not common in the culture and are undesirable        |

| Quality criterion | Chang et al. [2006] <sup>53</sup>                                                                                                                                       | Chang et al. [2019] <sup>52</sup>                                                                                               | Chapman et al. [1999] <sup>54</sup>                                                                              | Chaudhuri et al. [2013] <sup>55</sup>                                                                                                           | Cheng et al. [2017] <sup>56</sup>                                                                                |
|-------------------|-------------------------------------------------------------------------------------------------------------------------------------------------------------------------|---------------------------------------------------------------------------------------------------------------------------------|------------------------------------------------------------------------------------------------------------------|-------------------------------------------------------------------------------------------------------------------------------------------------|------------------------------------------------------------------------------------------------------------------|
| Research question | Yes                                                                                                                                                                     | Yes                                                                                                                             | Yes                                                                                                              | No clear formulation                                                                                                                            | Yes                                                                                                              |
| Preregistration   | No statement                                                                                                                                                            | No statement                                                                                                                    | No statement                                                                                                     | No statement                                                                                                                                    | No statement                                                                                                     |
| Study-population  | Yes; randomization: none; representativeness: no assessment possible; selection bias: different proportions and response rates of the individual included universities; | Yes; randomization: none; representativeness: none; selection bias: recruitment based on a selection process with presentations | Yes; randomization: none; representativeness: none; selection bias: voluntary participation (= primary interest) | Yes; randomization: none; representativeness: partly; selection bias: partly no indication of gender ratio, differences in recruiting countries | Yes; randomization: none; representativeness: none; selection bias: voluntary participation (= primary interest) |

|                                                                         |                                             |                                                                                                                       |                                                                                                                                                                                                                                                         |                                                                                                   |                                                                                                                                                                                                                |
|-------------------------------------------------------------------------|---------------------------------------------|-----------------------------------------------------------------------------------------------------------------------|---------------------------------------------------------------------------------------------------------------------------------------------------------------------------------------------------------------------------------------------------------|---------------------------------------------------------------------------------------------------|----------------------------------------------------------------------------------------------------------------------------------------------------------------------------------------------------------------|
|                                                                         | overrepresentation of male participants     |                                                                                                                       |                                                                                                                                                                                                                                                         |                                                                                                   |                                                                                                                                                                                                                |
| <b>Exposition and outcome</b>                                           | Yes                                         | Yes                                                                                                                   | Yes                                                                                                                                                                                                                                                     | Yes                                                                                               | Yes                                                                                                                                                                                                            |
| <b>Exposure measure(s), exposure levels</b>                             | Yes                                         | Yes; Confounding: differences in performance level and extent of teaching due to participation of different semesters | Yes                                                                                                                                                                                                                                                     | Yes                                                                                               | Yes; performance bias: possible changes over the course of time under consideration                                                                                                                            |
| <b>Definition of result, result measurement, number of measurements</b> | Yes; pilot testing                          | Yes; no pilot testing                                                                                                 | Yes; no pilot testing; multiple interviews: before and after the course                                                                                                                                                                                 | Yes; no pilot testing; questionnaire adaptation to the individual training levels                 | Yes; no pilot testing                                                                                                                                                                                          |
| <b>Follow-up</b>                                                        | /                                           | /                                                                                                                     | 4 months (start to end of course – choice of specialty not included)                                                                                                                                                                                    | /                                                                                                 | /                                                                                                                                                                                                              |
| <b>Statistical analysis and limitations</b>                             | Yes; no critical consideration of own study | Low; only indication of absolute and relative frequencies                                                             | Yes; no pairing of pre- and post-data (limited evidence of preference change); significant increase in emergency medicine preference may be due to an additional group of students (preference change) or due to a complete change in group composition | Low; only indication of absolute and relative frequencies; no critical consideration of own study | Yes; answering according to social desirability: conducting the survey of instructors of the clinical traineeship; bias: mainly answering by participants with more positive experiences and better impression |

| <b>Quality criterion</b>                                                | <b>Chew et al. [2018]<sup>58</sup></b>                                                                                                                                                                                                    | <b>Chew et al. [2011]<sup>59</sup></b>                                                                                                       | <b>Chung et al. [2016]<sup>60</sup></b>                                                                                                                                                                                                                                         | <b>Cichon and Feldman [2014]<sup>61</sup></b>                                                                                                                                                                                      | <b>Clayton et al. [2010]<sup>62</sup></b>                                                                                                                                                                            |
|-------------------------------------------------------------------------|-------------------------------------------------------------------------------------------------------------------------------------------------------------------------------------------------------------------------------------------|----------------------------------------------------------------------------------------------------------------------------------------------|---------------------------------------------------------------------------------------------------------------------------------------------------------------------------------------------------------------------------------------------------------------------------------|------------------------------------------------------------------------------------------------------------------------------------------------------------------------------------------------------------------------------------|----------------------------------------------------------------------------------------------------------------------------------------------------------------------------------------------------------------------|
| <b>Research question</b>                                                | Yes                                                                                                                                                                                                                                       | Yes                                                                                                                                          | Yes                                                                                                                                                                                                                                                                             | Yes                                                                                                                                                                                                                                | No clear formulation                                                                                                                                                                                                 |
| <b>Preregistration</b>                                                  | No statement                                                                                                                                                                                                                              | No statement                                                                                                                                 | No statement                                                                                                                                                                                                                                                                    | No statement                                                                                                                                                                                                                       | No statement                                                                                                                                                                                                         |
| <b>Study-population</b>                                                 | Yes; randomization: none; representativeness: no assessment possible Selection bias: overrepresentation 4 <sup>th</sup> year of study, underrepresentation 5 <sup>th</sup> year of study, inclusion of only one of the teaching hospitals | Yes; randomization: none; representativeness: none; selection bias: only inclusion of study years 4 and 5, higher proportion of study year 4 | Yes; randomization: none; representativeness: given for both universities (authors' statement), not for a generally valid statement for medical students (research objective); selection bias: different proportions of included universities, different recruitment strategies | Yes; randomization: none; representativeness: none - no agreement with the data of the "Accreditation Council for Graduate Medical Education" in the same year (gender); selection bias: overrepresentation of female participants | Yes; randomization: none; representativeness: no assessment possible; selection bias: only inclusion of members of the "British Association of Dermatologists (BAD)", no socio-demographic information on the sample |
| <b>Exposition and outcome</b>                                           | Yes                                                                                                                                                                                                                                       | Yes                                                                                                                                          | Yes                                                                                                                                                                                                                                                                             | Yes                                                                                                                                                                                                                                | Yes                                                                                                                                                                                                                  |
| <b>Exposure measure(s), exposure levels</b>                             | Yes, confounding: differences in the level of performance and the extent of teaching due to the participation of different semesters                                                                                                      | Yes                                                                                                                                          | Yes; performance bias/confounding: possible (curricular) differences between included universities                                                                                                                                                                              | Yes; performance bias/confounding: possible (curricular) differences in university education; no presentation/listing of the investigated influencing factors                                                                      | Yes; performance bias/confounding: possible (curricular) differences in university education as well as training programs                                                                                            |
| <b>Definition of result, result measurement, number of measurements</b> | Yes; pilot testing; measurement bias: no uniform implementation                                                                                                                                                                           | Yes; pilot testing; measurement bias: no uniform implementation                                                                              | Yes; pilot testing; measurement bias: no uniform implementation                                                                                                                                                                                                                 | Yes; use of a previously used questionnaire ("National Survey of Factors Influencing Career Choice"), different                                                                                                                    | Yes; no pilot testing                                                                                                                                                                                                |

|                                             |     |     |                                                                                                                                                                                      |                                                           |                                                                                                   |
|---------------------------------------------|-----|-----|--------------------------------------------------------------------------------------------------------------------------------------------------------------------------------------|-----------------------------------------------------------|---------------------------------------------------------------------------------------------------|
|                                             |     |     |                                                                                                                                                                                      | questionnaires for the groups studied                     |                                                                                                   |
| <b>Follow-up</b>                            | /   | /   | /                                                                                                                                                                                    | /                                                         | /                                                                                                 |
| <b>Statistical analysis and limitations</b> | Yes | Yes | Yes; bias: remuneration for participation (lottery pool); low response rate when conducting the pilot study, participants in the pilot study were not excluded from the final survey | Low; only indication of absolute and relative frequencies | Low; only indication of absolute and relative frequencies; no critical consideration of own study |

| <b>Quality criterion</b>                                                | <b>Clayton and Trotter [2013]<sup>63</sup></b>                                                                                                                                                                                                | <b>Cochran et al. [2005]<sup>64</sup></b>                                                                                                                          | <b>Codsi et al. [2019]<sup>65</sup></b>                                                                                                                                                      | <b>Corbett et al. [2002]<sup>66</sup></b>                                                              | <b>Correia Lima de Souza et al. [2015]<sup>67</sup></b>                                                       |
|-------------------------------------------------------------------------|-----------------------------------------------------------------------------------------------------------------------------------------------------------------------------------------------------------------------------------------------|--------------------------------------------------------------------------------------------------------------------------------------------------------------------|----------------------------------------------------------------------------------------------------------------------------------------------------------------------------------------------|--------------------------------------------------------------------------------------------------------|---------------------------------------------------------------------------------------------------------------|
| <b>Research question</b>                                                | Yes                                                                                                                                                                                                                                           | Yes                                                                                                                                                                | Yes                                                                                                                                                                                          | No clear formulation                                                                                   | Yes                                                                                                           |
| <b>Preregistration</b>                                                  | No statement                                                                                                                                                                                                                                  | No statement                                                                                                                                                       | No statement                                                                                                                                                                                 | No statement                                                                                           | No statement                                                                                                  |
| <b>Study-population</b>                                                 | Yes; randomization: none; representativeness: partly; selection bias: different proportions of the individual included universities, inclusion of only English-speaking Canadian universities, no socio-demographic information on the sample | Yes; randomization: none; representativeness: partly (demographic factors); selection bias: inclusion only of institutions that could be reached by e-mail contact | Yes; randomization: none; representativeness: given (authors' statement for Quebec/Canada) - none for the research objective; selection bias: over-representativeness of female participants | Yes; randomization: none; representativeness: no assessment possible                                   | Yes; randomization: none; representativeness: partly (gender, distribution in private and state universities) |
| <b>Exposition and outcome</b>                                           | Yes                                                                                                                                                                                                                                           | Yes                                                                                                                                                                | Yes                                                                                                                                                                                          | Yes                                                                                                    | Yes                                                                                                           |
| <b>Exposure measure(s), exposure levels</b>                             | Yes; performance bias/confounding: possible differences between included universities                                                                                                                                                         | Yes; performance bias/confounding: possible differences between included universities                                                                              | Yes; performance bias/confounding: possible differences between included general medicine institutions                                                                                       | Yes; performance bias/confounding: possible differences between included general medicine institutions | Yes; performance bias/confounding: possible differences between included universities                         |
| <b>Definition of result, result measurement, number of measurements</b> | Yes; no pilot testing                                                                                                                                                                                                                         | Yes; no pilot testing                                                                                                                                              | Yes; pilot testing                                                                                                                                                                           | Yes; no pilot testing; multiple interviews: before and after the internship                            | Yes; pilot testing                                                                                            |
| <b>Follow-up</b>                                                        | /                                                                                                                                                                                                                                             | /                                                                                                                                                                  | /                                                                                                                                                                                            | 1 week (start to end of internship - choice of specialty not included)                                 | /                                                                                                             |
| <b>Statistical analysis and limitations</b>                             | Yes                                                                                                                                                                                                                                           | Yes; bias: remuneration of participation                                                                                                                           | Yes                                                                                                                                                                                          | Yes; comparison with career planning after the end of studies                                          | Yes; authors indicated a possible selection bias due to the 20.8% "non-responders".                           |

| <b>Quality criterion</b> | <b>Coyan et al. [2020]<sup>68</sup></b>                                                                                                                                          | <b>Croghan and Baker [2020]<sup>69</sup></b>                                                                                                                                   | <b>Cronin et al. [2019]<sup>70</sup></b>                                                                                                                                       | <b>Dallas et al. [2019]<sup>71</sup></b>                                                                                                                                                                          | <b>de Gates et al. [2019]<sup>75</sup></b>                                                         |
|--------------------------|----------------------------------------------------------------------------------------------------------------------------------------------------------------------------------|--------------------------------------------------------------------------------------------------------------------------------------------------------------------------------|--------------------------------------------------------------------------------------------------------------------------------------------------------------------------------|-------------------------------------------------------------------------------------------------------------------------------------------------------------------------------------------------------------------|----------------------------------------------------------------------------------------------------|
| <b>Research question</b> | Yes                                                                                                                                                                              | Yes                                                                                                                                                                            | Yes                                                                                                                                                                            | Yes                                                                                                                                                                                                               | Yes                                                                                                |
| <b>Preregistration</b>   | No statement                                                                                                                                                                     | No statement                                                                                                                                                                   | No statement                                                                                                                                                                   | No statement                                                                                                                                                                                                      | No statement                                                                                       |
| <b>Study-population</b>  | Yes; randomization: none; representativeness: partly (demographic factors for the institution - authors' statement) - but not for the research objective; selection bias: under- | Yes; randomization: none (quantitative), random sample for the focus groups; representativeness: no assessment possible; selection bias: different recruitment strategy, over- | Yes; randomization: none; representativeness: no assessment possible; selection bias: different proportions and response rates of the included universities and years of study | Yes; randomization: none; representativeness: none; selection bias: voluntary participation (= primary interest) overrepresentation of male participants, overrepresentation of 1 <sup>st</sup> year students; no | Yes; randomization: none; representativeness: none; no socio-demographic information on the sample |

|                                                                         |                                                         |                                                                                                                   |                       |                                                                                                                                                                                                                                                                          |                                                                                                    |
|-------------------------------------------------------------------------|---------------------------------------------------------|-------------------------------------------------------------------------------------------------------------------|-----------------------|--------------------------------------------------------------------------------------------------------------------------------------------------------------------------------------------------------------------------------------------------------------------------|----------------------------------------------------------------------------------------------------|
|                                                                         | representativeness of the 5 <sup>th</sup> year of study | representativeness of male participants in the focus groups                                                       |                       | recruitment from the same population                                                                                                                                                                                                                                     |                                                                                                    |
| <b>Exposition and outcome</b>                                           | Yes                                                     | Yes                                                                                                               | Yes                   | Yes                                                                                                                                                                                                                                                                      | Yes                                                                                                |
| <b>Exposure measure(s), exposure levels</b>                             | Yes                                                     | Yes; performance bias/confounding: possible differences between included universities                             | Yes                   | Yes; performance bias/confounding: possible differences between the included universities, different number of sessions                                                                                                                                                  | Yes; performance bias/confounding: possible differences between included universities              |
| <b>Definition of result, result measurement, number of measurements</b> | Yes; pilot testing                                      | Yes; no pilot testing, but based on the questionnaire of the "Association for Medical Education in Europe (AMEE)" | Yes; no pilot testing | Yes; no pilot testing; multiple interviews: before and after the course                                                                                                                                                                                                  | Yes; validated measuring instrument (quantitative date)                                            |
| <b>Follow-up</b>                                                        | /                                                       | /                                                                                                                 | /                     | Start to end of course (choice of specialty not included)                                                                                                                                                                                                                | /                                                                                                  |
| <b>Statistical analysis and limitations</b>                             | Yes                                                     | Yes; answering according to social desirability: conducting the focus group discussions by the first author       | Yes                   | Yes; tendency to positive evaluation by pre-clinical participants, (possibly first encounter with a clinical specialty, associated euphoria/enthusiasm for the first clinical experience, no competition from other clinical specialties); no verification of attendance | Yes; bias: compensation for participation, announcement of a change of course before the interview |

| <b>Quality criterion</b>                                                | <b>DeBolle et al. [2019]<sup>76</sup></b>                                                                                                                           | <b>Deutsch et al. [2014]<sup>77</sup></b>                                                                                                                            | <b>Deutsch et al. [2013]<sup>78</sup></b>                                                                                                                                                                                       | <b>Deutsch et al. [2015]<sup>79</sup></b>                                                                                                                            | <b>Dever et al. [2001]<sup>80</sup></b>                                                                                              |
|-------------------------------------------------------------------------|---------------------------------------------------------------------------------------------------------------------------------------------------------------------|----------------------------------------------------------------------------------------------------------------------------------------------------------------------|---------------------------------------------------------------------------------------------------------------------------------------------------------------------------------------------------------------------------------|----------------------------------------------------------------------------------------------------------------------------------------------------------------------|--------------------------------------------------------------------------------------------------------------------------------------|
| <b>Research question</b>                                                | No clear formulation                                                                                                                                                | Yes                                                                                                                                                                  | Yes                                                                                                                                                                                                                             | Yes                                                                                                                                                                  | Yes                                                                                                                                  |
| <b>Preregistration</b>                                                  | No statement                                                                                                                                                        | No statement                                                                                                                                                         | No statement                                                                                                                                                                                                                    | No statement                                                                                                                                                         | No statement                                                                                                                         |
| <b>Study-population</b>                                                 | No; randomization: no assessment possible; representativeness: no assessment possible; selection bias: no socio-demographic and numerical information on the sample | Yes; randomization: none; representativeness: given (authors' statement); selection bias: different proportions and response rates for the individual survey cohorts | Yes; randomization: none; representativeness: partly (age - authors' statement) - but not for the study objective; selection bias: voluntary participation (= primary interest), over-representativeness of female participants | Yes; randomization: none; representativeness: given (authors' statement); selection bias: different proportions and response rates for the individual survey cohorts | Yes; Randomization: none; Representativeness: no assessment possible; Selection bias: no socio-demographic information on the sample |
| <b>Exposition and outcome</b>                                           | Yes                                                                                                                                                                 | Yes                                                                                                                                                                  | Yes                                                                                                                                                                                                                             | Yes                                                                                                                                                                  | Yes                                                                                                                                  |
| <b>Exposure measure(s), exposure levels</b>                             | Yes                                                                                                                                                                 | Yes; performance bias: different numbers of perceived general practice services                                                                                      | Yes; performance bias/confounding: possible differences between the different practices                                                                                                                                         | Yes; performance bias: different numbers of perceived general practice services                                                                                      | Yes                                                                                                                                  |
| <b>Definition of result, result measurement, number of measurements</b> | Yes; use of valid data from databases                                                                                                                               | Yes; pilot testing; measurement bias: different survey times                                                                                                         | Yes; no pilot testing; multiple interviews: before and after elective subject                                                                                                                                                   | Yes; pilot testing; measurement bias: no uniform implementation (different survey times)                                                                             | Yes; no pilot testing                                                                                                                |
| <b>Follow-up</b>                                                        | /                                                                                                                                                                   | /                                                                                                                                                                    | Start to end of elective (choice of specialty not included)                                                                                                                                                                     | /                                                                                                                                                                    | 11 years (choice of specialty included)                                                                                              |
| <b>Statistical analysis and limitations</b>                             | Low; only indication of annual applicant numbers; high                                                                                                              | Yes; no significant difference between "responders" and "non-                                                                                                        | Yes; tendency to positive evaluation by pre-clinical                                                                                                                                                                            | Yes; no significant difference between "responders" and "non-                                                                                                        | Yes; reporting bias: the influence of rotation in the last                                                                           |

|  |                                          |                                                                                |                                                                                                                                                                                      |                                                                                |                                                                                                 |
|--|------------------------------------------|--------------------------------------------------------------------------------|--------------------------------------------------------------------------------------------------------------------------------------------------------------------------------------|--------------------------------------------------------------------------------|-------------------------------------------------------------------------------------------------|
|  | susceptibility to biases and distortions | responders"; 24% had not yet completed their studies at the time of the survey | participants, (possibly first encounter with a clinical specialty, associated euphoria/enthusiasm for the first clinical experience, no competition from other clinical specialties) | responders"; 24% had not yet completed their studies at the time of the survey | year, as a strong influencing factor for the non-primary care specialties, was not investigated |
|--|------------------------------------------|--------------------------------------------------------------------------------|--------------------------------------------------------------------------------------------------------------------------------------------------------------------------------------|--------------------------------------------------------------------------------|-------------------------------------------------------------------------------------------------|

| Quality criterion                                                       | Dewey and Agostini [2010] <sup>81</sup>                                                                                              | Dogbey et al. [2018] <sup>82</sup>                                                                                                     | Doucet et al. [1999] <sup>83</sup>                 | Dunkley et al. [2008] <sup>85</sup>                                                                                                       | Ek et al. [2005] <sup>86</sup>                                                                                                       |
|-------------------------------------------------------------------------|--------------------------------------------------------------------------------------------------------------------------------------|----------------------------------------------------------------------------------------------------------------------------------------|----------------------------------------------------|-------------------------------------------------------------------------------------------------------------------------------------------|--------------------------------------------------------------------------------------------------------------------------------------|
| <b>Research question</b>                                                | Yes                                                                                                                                  | Yes                                                                                                                                    | Yes                                                | Yes                                                                                                                                       | Yes                                                                                                                                  |
| <b>Preregistration</b>                                                  | No statement                                                                                                                         | No statement                                                                                                                           | No statement                                       | No statement                                                                                                                              | No statement                                                                                                                         |
| <b>Study-population</b>                                                 | Yes; randomization: none; representativeness: no assessment possible; selection bias: no socio-demographic information on the sample | Yes; randomization: none; representativeness: none; selection bias: higher proportion of students; differences in recruitment strategy | Yes; randomization: none; representativeness: none | Yes; randomization: none; representativeness: partly; selection bias: different proportions of years of further education and of regions  | Yes; randomization: none; representativeness: no assessment possible; selection bias: different proportions of included universities |
| <b>Exposition and outcome</b>                                           | Yes                                                                                                                                  | Yes                                                                                                                                    | Yes                                                | Yes                                                                                                                                       | Yes                                                                                                                                  |
| <b>Exposure measure(s), exposure levels</b>                             | Yes; performance bias: differences in the clinical rotation wards and the implementation dates of the clinical clerkship/internship  | Yes; performance bias/confounding: possible differences between included universities                                                  | Yes                                                | Yes; performance bias/confounding: possible differences between the training programs                                                     | Yes; performance bias/confounding: possible differences between included universities                                                |
| <b>Definition of result, result measurement, number of measurements</b> | Yes; no pilot testing                                                                                                                | Yes; pilot testing (no information on the sample of the pilot study, selection bias not excluded)                                      | Yes; no pilot testing                              | Yes; pilot testing                                                                                                                        | Yes; no pilot testing                                                                                                                |
| <b>Follow-up</b>                                                        | /                                                                                                                                    | /                                                                                                                                      | /                                                  | /                                                                                                                                         | /                                                                                                                                    |
| <b>Statistical analysis and limitations</b>                             | Yes; simple blinding; matching with the choice of specialist according to the result of the "Residency Matching"                     | Yes                                                                                                                                    | Yes                                                | Yes; recall bias: increasing with the number of years between the end of the study and the survey; no critical consideration on own study | Yes; only indication of absolute and relative frequencies                                                                            |

| Quality criterion                           | Ekenze et al. [2013] <sup>87</sup>                                   | Ellsburly et al. [1996] <sup>88</sup>                                                                                                                                          | Ellsburly et al. [1998] <sup>89</sup>                                                                                                                                       | Erraji et al. [2015] <sup>90</sup>                                                                                                         | Erzurum et al. [2000] <sup>91</sup>                |
|---------------------------------------------|----------------------------------------------------------------------|--------------------------------------------------------------------------------------------------------------------------------------------------------------------------------|-----------------------------------------------------------------------------------------------------------------------------------------------------------------------------|--------------------------------------------------------------------------------------------------------------------------------------------|----------------------------------------------------|
| <b>Research question</b>                    | Yes                                                                  | Yes                                                                                                                                                                            | Yes                                                                                                                                                                         | Yes                                                                                                                                        | Yes                                                |
| <b>Preregistration</b>                      | No statement                                                         | No statement                                                                                                                                                                   | No statement                                                                                                                                                                | No statement                                                                                                                               | No statement                                       |
| <b>Study-population</b>                     | Yes; randomization: none; representativeness: no assessment possible | Yes; randomization: none; representativeness: none; selection bias: selection of two universities that produce a high rate of primary care physicians in a national comparison | Yes; randomization: none; representativeness: none; selection bias: inclusion of universities that produce a large number of general practitioners in a national comparison | Yes; randomization: none; representativeness: none; selection bias: over-representativeness of group 1, response only by male participants | Yes; randomization: none; representativeness: none |
| <b>Exposition and outcome</b>               | Yes                                                                  | Yes                                                                                                                                                                            | Yes                                                                                                                                                                         | Yes                                                                                                                                        | Yes                                                |
| <b>Exposure measure(s), exposure levels</b> | Yes                                                                  | Yes; performance bias/confounding: possible differences between included universities                                                                                          | Yes                                                                                                                                                                         | Yes; performance bias/confounding: possible differences between included institutions                                                      | Yes                                                |

|                                                                         |                                                                                                   |                                                                                                                                                 |                                                                    |                                                                                                                                                                                                                             |                                                                    |
|-------------------------------------------------------------------------|---------------------------------------------------------------------------------------------------|-------------------------------------------------------------------------------------------------------------------------------------------------|--------------------------------------------------------------------|-----------------------------------------------------------------------------------------------------------------------------------------------------------------------------------------------------------------------------|--------------------------------------------------------------------|
| <b>Definition of result, result measurement, number of measurements</b> | Yes; no pilot testing                                                                             | Yes; no pilot testing                                                                                                                           | Yes; no pilot testing; measurement bias: no uniform implementation | Yes; no pilot testing                                                                                                                                                                                                       | Yes; no pilot testing; measurement bias: no uniform implementation |
| <b>Follow-up</b>                                                        | /                                                                                                 | /                                                                                                                                               | /                                                                  | /                                                                                                                                                                                                                           | /                                                                  |
| <b>Statistical analysis and limitations</b>                             | Yes; interview directly on the last day of the clerkship; low critical consideration on own study | Yes; reporting bias: exclusion of influencing factors named by less than 5% of the participants; bias in the interpretation of qualitative data | Yes                                                                | Low; only absolute and relative frequencies are given, according to the authors' statement, the results were not made significant; recall bias increases with the number of years between the end of studies and the survey | Yes; low critical consideration of own study                       |

|                                                                         |                                                                                                                                                                                                                                                                           |                                                                                                                                                                                                                                                |                                                                                                                                                                                                                                                                                                                  |                                                                                                                                                                                                       |                                                                                                                                                                                                                           |
|-------------------------------------------------------------------------|---------------------------------------------------------------------------------------------------------------------------------------------------------------------------------------------------------------------------------------------------------------------------|------------------------------------------------------------------------------------------------------------------------------------------------------------------------------------------------------------------------------------------------|------------------------------------------------------------------------------------------------------------------------------------------------------------------------------------------------------------------------------------------------------------------------------------------------------------------|-------------------------------------------------------------------------------------------------------------------------------------------------------------------------------------------------------|---------------------------------------------------------------------------------------------------------------------------------------------------------------------------------------------------------------------------|
| <b>Quality criterion</b>                                                | <b>Farooq et al. [2014]<sup>92</sup></b>                                                                                                                                                                                                                                  | <b>Fehlmann et al. [2019]<sup>93</sup></b>                                                                                                                                                                                                     | <b>Feit [1994]<sup>94</sup></b>                                                                                                                                                                                                                                                                                  | <b>Fereydooni et al. [2021]<sup>95</sup></b>                                                                                                                                                          | <b>Fitzgerald et al. [2013]<sup>97</sup></b>                                                                                                                                                                              |
| <b>Research question</b>                                                | Yes                                                                                                                                                                                                                                                                       | Yes                                                                                                                                                                                                                                            | Yes                                                                                                                                                                                                                                                                                                              | No clear formulation                                                                                                                                                                                  | Yes                                                                                                                                                                                                                       |
| <b>Preregistration</b>                                                  | No statement                                                                                                                                                                                                                                                              | No statement                                                                                                                                                                                                                                   | No statement                                                                                                                                                                                                                                                                                                     | No statement                                                                                                                                                                                          | No statement                                                                                                                                                                                                              |
| <b>Study-population</b>                                                 | Yes; randomization: none; representativeness: partly (some regions not represented); selection bias: differences in the response rates of the individual countries (overrepresentation of German medical students, underrepresentation of Brazil, Hong Kong, Chile, etc.) | Yes; randomization: none; representativeness: partly (choice of continuing education in the investigated field and its gender ratio) - rest not assessable; selection bias: differences in the survey dates or in the years of data collection | Yes; randomization: none; representativeness: no assessment possible; selection bias; different recruitment strategies, no socio-demographic information on the sample                                                                                                                                           | Yes; randomization: none; representativeness: none; selection bias: application process for the further education position simultaneously constituted the application process for study participation | Yes; randomization: none; representativeness: no significant difference of the sample to the total population - but none for the research objective; selection bias: overrepresentation of the standard 5-year curriculum |
| <b>Exposition and outcome</b>                                           | Yes                                                                                                                                                                                                                                                                       | Yes                                                                                                                                                                                                                                            | Low                                                                                                                                                                                                                                                                                                              | Yes                                                                                                                                                                                                   | Yes                                                                                                                                                                                                                       |
| <b>Exposure measure(s), exposure levels</b>                             | Yes; performance bias/confounding: possible differences between the included universities of the different countries                                                                                                                                                      | Yes                                                                                                                                                                                                                                            | Yes; performance bias/confounding: possible differences between the included universities                                                                                                                                                                                                                        | Yes; performance bias/confounding: possible (curricular) differences in university education                                                                                                          | Yes                                                                                                                                                                                                                       |
| <b>Definition of result, result measurement, number of measurements</b> | Yes; pilot testing and use of already validated questionnaires; measurement bias: no uniform implementation                                                                                                                                                               | Yes; no pilot testing; measurement bias: no uniform implementation                                                                                                                                                                             | Yes; no pilot testing; measurement bias: no uniform implementation                                                                                                                                                                                                                                               | Yes; no pilot testing; questionnaires prepared by authors who participated in the study themselves                                                                                                    | Yes; pilot testing                                                                                                                                                                                                        |
| <b>Follow-up</b>                                                        | /                                                                                                                                                                                                                                                                         | /                                                                                                                                                                                                                                              | /                                                                                                                                                                                                                                                                                                                | /                                                                                                                                                                                                     | /                                                                                                                                                                                                                         |
| <b>Statistical analysis and limitations</b>                             | Yes; bias: transfer of 5-point Likert scale results to a binary outcome; data not available from all countries on all questionnaires; missing data from American and Australian regions                                                                                   | Yes                                                                                                                                                                                                                                            | Yes; response according to social desirability: author is himself a student at one of the included universities; no indication of a response rate; division of the subject areas into different categories, but no indication of the definitions of the individual categories and their associated subject areas | Yes; bias: remuneration of participation (lottery pool); bias: participation of two authors                                                                                                           | Yes                                                                                                                                                                                                                       |

|                          |                                           |                                  |                                        |                                    |                                         |
|--------------------------|-------------------------------------------|----------------------------------|----------------------------------------|------------------------------------|-----------------------------------------|
| <b>Quality criterion</b> | <b>Fogarty et al. [2003]<sup>98</sup></b> | <b>Ford [2005]<sup>100</sup></b> | <b>Ford et al. [2018]<sup>99</sup></b> | <b>Foster [1994]<sup>101</sup></b> | <b>Frey et al. [2021]<sup>102</sup></b> |
|--------------------------|-------------------------------------------|----------------------------------|----------------------------------------|------------------------------------|-----------------------------------------|

|                                                                         |                                                                                |                                                                                                                                                                                                                                     |                                                                                                                                                                                                                                                   |                                                                                                                                                                 |                                                                                                                                                                                    |
|-------------------------------------------------------------------------|--------------------------------------------------------------------------------|-------------------------------------------------------------------------------------------------------------------------------------------------------------------------------------------------------------------------------------|---------------------------------------------------------------------------------------------------------------------------------------------------------------------------------------------------------------------------------------------------|-----------------------------------------------------------------------------------------------------------------------------------------------------------------|------------------------------------------------------------------------------------------------------------------------------------------------------------------------------------|
| <b>Research question</b>                                                | Yes                                                                            | No clear formulation                                                                                                                                                                                                                | Yes                                                                                                                                                                                                                                               | Yes                                                                                                                                                             | Yes                                                                                                                                                                                |
| <b>Preregistration</b>                                                  | No statement                                                                   | No statement                                                                                                                                                                                                                        | No statement                                                                                                                                                                                                                                      | No statement                                                                                                                                                    | No statement                                                                                                                                                                       |
| <b>Study-population</b>                                                 | Yes; randomization: none; representativeness: none; missing data (gender data) | Yes; randomization: none; Representativeness: partly (English-speaking universities); Selection bias: Inclusion of English-speaking universities only; Different recruitment strategies                                             | Yes; randomization: none; representativeness: no assessment possible; no socio-demographic information on the sample populations; selection bias: voluntary participation (= primary interest), recruitment of participants based on applications | Yes; randomization: none; representativeness: none; selection bias: voluntary participation (= primary interest)                                                | Yes; randomization: none; representativeness: no assessment possible; selection bias: voluntary participation (= primary interest), no socio-demographic information on the sample |
| <b>Exposition and outcome</b>                                           | Yes                                                                            | Yes                                                                                                                                                                                                                                 | Yes                                                                                                                                                                                                                                               | Yes                                                                                                                                                             | Yes                                                                                                                                                                                |
| <b>Exposure measure(s), exposure levels</b>                             | Yes; performance bias: in the course of study Changes in the curriculum        | Yes; performance bias/confounding: possible differences between included universities                                                                                                                                               | Yes; performance bias: different curricular/university requirements compared to the comparison group                                                                                                                                              | Yes                                                                                                                                                             | Yes                                                                                                                                                                                |
| <b>Definition of result, result measurement, number of measurements</b> | Yes; no pilot testing                                                          | Yes; no pilot testing and use of validated/valid Canadian Resident Matching Service (CaRMS) data                                                                                                                                    | Yes; pilot testing of the intervention; questionnaire development based on already validated questionnaires                                                                                                                                       | Yes; no pilot testing; measurement bias: questionnaire based on letters to participants (64% answered)                                                          | Yes; no pilot testing; multiple interviews: before and after the course                                                                                                            |
| <b>Follow-up</b>                                                        | /                                                                              | /                                                                                                                                                                                                                                   | /                                                                                                                                                                                                                                                 | /                                                                                                                                                               | Start to end of course (choice of specialty not included)                                                                                                                          |
| <b>Statistical analysis and limitations</b>                             | Yes; no critical consideration of own study                                    | Yes; no definition of PBL given; purely subjective data output by the representatives of the universities; choice of subject area in the CaRMS may have been influenced by factors such as "popularity of individual subject areas" | Low; only indication of absolute and relative frequencies; no temporal correlation of the compared data, data of the comparison group from previous years                                                                                         | Yes; inclusion of questionnaires from participants who completed the program; tendency to positivity: participants showed significantly higher academic success | Yes; no pairing of pre- and post-data (limited statement on preference change); no critical consideration of own study                                                             |

| Quality criterion                           | Gami and Howe [2020] <sup>103</sup>                                                                                                                             | Gawad et al. [2013] <sup>104</sup>                                                                                                                                               | Gebhard and Müller-Hilke [2019] <sup>105</sup>                                                                                                                                                                        | Glasbey et al. [2017] <sup>106</sup>                                                                                                                                    | Goldacre et al. [2013] <sup>107</sup>                                                                                                                                                                           |
|---------------------------------------------|-----------------------------------------------------------------------------------------------------------------------------------------------------------------|----------------------------------------------------------------------------------------------------------------------------------------------------------------------------------|-----------------------------------------------------------------------------------------------------------------------------------------------------------------------------------------------------------------------|-------------------------------------------------------------------------------------------------------------------------------------------------------------------------|-----------------------------------------------------------------------------------------------------------------------------------------------------------------------------------------------------------------|
| <b>Research question</b>                    | No clear formulation                                                                                                                                            | No clear formulation                                                                                                                                                             | Yes                                                                                                                                                                                                                   | Yes                                                                                                                                                                     | Yes                                                                                                                                                                                                             |
| <b>Preregistration</b>                      | No statement                                                                                                                                                    | No statement                                                                                                                                                                     | No statement                                                                                                                                                                                                          | No statement                                                                                                                                                            | No statement                                                                                                                                                                                                    |
| <b>Study-population</b>                     | Yes; randomization: none; representativeness: given (authors' statement); selection bias: university produces more general practitioners in national comparison | Low methodological and recruitment representation; randomization: none; representativeness: no assessment possible; selection bias: voluntary participation (= primary interest) | Yes; randomization: none; representativeness: no assessment possible; selection bias: significantly higher proportion of 4 <sup>th</sup> and 5 <sup>th</sup> year students, overrepresentation of female participants | Yes; randomization: none; representativeness: partly; selection bias: overrepresentation clinical phase, overrepresentation UK sites; very large age range, course cost | Yes; randomization: none; representativeness: no assessment possible; selection bias: no socio-demographic information on the sample; little description of the recruitment strategy (reference to other study) |
| <b>Exposition and outcome</b>               | Yes                                                                                                                                                             | Yes                                                                                                                                                                              | Yes                                                                                                                                                                                                                   | Yes                                                                                                                                                                     | Yes                                                                                                                                                                                                             |
| <b>Exposure measure(s), exposure levels</b> | Yes                                                                                                                                                             | Yes; performance bias: differences in subject order                                                                                                                              | Yes; no presentation/listing of all investigated influencing factors                                                                                                                                                  | Yes; performance bias: course costs only for participants who are not members of the Association of Surgeons in                                                         | Yes; performance bias/confounding: possible differences between university                                                                                                                                      |

|                                                                         |                                                                                                                               |                                                                                                        |                                                                                                                |                                                                                                                                                                                                 |                                                                                                                                                                                |
|-------------------------------------------------------------------------|-------------------------------------------------------------------------------------------------------------------------------|--------------------------------------------------------------------------------------------------------|----------------------------------------------------------------------------------------------------------------|-------------------------------------------------------------------------------------------------------------------------------------------------------------------------------------------------|--------------------------------------------------------------------------------------------------------------------------------------------------------------------------------|
|                                                                         |                                                                                                                               |                                                                                                        |                                                                                                                | Training (ASiT), no uniform implementation at the different venues                                                                                                                              | education and training programs (also over time)                                                                                                                               |
| <b>Definition of result, result measurement, number of measurements</b> | Yes; no pilot testing, based on already used questionnaires                                                                   | Yes; study itself is the pilot study of the program; multiple interviews: before and after the program | Yes; no pilot testing; questionnaire compiled on the basis of focus group discussions: 84% female participants | Yes; no pilot testing; multiple interviews: before and after the course                                                                                                                         | Yes; no pilot testing; multiple interviews: End of study, 1 <sup>st</sup> , 3 <sup>rd</sup> and 5 <sup>th</sup> postgraduate year; measurement bias: no uniform implementation |
| <b>Follow-up</b>                                                        | /                                                                                                                             | Start to end of program (choice of specialty not included)                                             | /                                                                                                              | Start to end of course (choice of specialty not included)                                                                                                                                       | each cohort at least 5 years (choice of specialty included)                                                                                                                    |
| <b>Statistical analysis and limitations</b>                             | Yes; absolute and relative frequencies only; conflict of interest: second author is a staff member at the included university | Yes; bias: pre- and post-survey were the same                                                          | Yes                                                                                                            | Yes; bias: participation was necessary to receive the course certificate, the best ratings came from Association of Surgeons in Training (ASiT) members; no critical consideration of own study | Yes; recall bias eliminated by prospective approach; reporting bias: data gaps and outstanding data                                                                            |

| Quality criterion                                                       | Goldacre et al. [2010] <sup>108</sup>                                                                                                                                                                            | Golden et al. [2010] <sup>109</sup>                                                                  | Golden et al. [2014] <sup>110</sup>                                                                                       | Goldenberg et al. [2017] <sup>111</sup>                                                                                                                     | Goldman et al. [2019] <sup>112</sup>                                                                        |
|-------------------------------------------------------------------------|------------------------------------------------------------------------------------------------------------------------------------------------------------------------------------------------------------------|------------------------------------------------------------------------------------------------------|---------------------------------------------------------------------------------------------------------------------------|-------------------------------------------------------------------------------------------------------------------------------------------------------------|-------------------------------------------------------------------------------------------------------------|
| <b>Research question</b>                                                | Yes                                                                                                                                                                                                              | Yes                                                                                                  | Yes                                                                                                                       | No clear formulation                                                                                                                                        | Yes                                                                                                         |
| <b>Preregistration</b>                                                  | No statement                                                                                                                                                                                                     | No statement                                                                                         | No statement                                                                                                              | No statement                                                                                                                                                | No statement                                                                                                |
| <b>Study-population</b>                                                 | Low; randomization: none; representativeness: no assessment possible; selection bias: no socio-demographic information on the sample; little description of the recruitment strategy (reference to other study)  | Yes; randomization: none; representativeness: none                                                   | Yes; randomization: none; Representativeness: none; Selection bias: overrepresentation of Chicago students                | Yes; randomization: none; Representativeness: partly; Selection bias: no socio-demographic information on the sample                                        | Yes; randomization: none; representativeness: none; selection bias: overrepresentation of male participants |
| <b>Exposition and outcome</b>                                           | Yes                                                                                                                                                                                                              | Yes                                                                                                  | Yes                                                                                                                       | Yes                                                                                                                                                         | Yes                                                                                                         |
| <b>Exposure measure(s), exposure levels</b>                             | Yes; Performance bias/confounding: possible differences between university education and training programs (also over time)                                                                                      | Yes                                                                                                  | Yes; performance bias: no uniform implementation                                                                          | Yes; performance bias/confounding: possible differences between included universities                                                                       | Yes; performance bias/confounding: possible differences between included institutions                       |
| <b>Definition of result, result measurement, number of measurements</b> | Yes; no pilot testing; multiple interviews: End of study, 1 <sup>st</sup> , 3 <sup>rd</sup> and 5 <sup>th</sup> postgraduate year, as well as in the further course; measurement bias: no uniform implementation | Yes; no pilot testing                                                                                | Yes; study itself was a pilot study; multiple interviews: before and after clerkship                                      | Yes; using the results of validated questionnaires (Matriculating Student Questionnaire (MSQ), end: Medical School Graduation Questionnaire (GQ), the AAMC) | Yes; no pilot testing; measurement bias: no uniform implementation (differences in survey time points)      |
| <b>Follow-up</b>                                                        | each cohort at least 5 years (choice of specialty included)                                                                                                                                                      | /                                                                                                    | Start to end of clerkship (choice of specialty not included)                                                              | /                                                                                                                                                           | /                                                                                                           |
| <b>Statistical analysis and limitations</b>                             | Yes; recall bias eliminated by prospective approach; reporting bias: data gaps and outstanding data                                                                                                              | Low; only absolute and relative frequencies given; bias due to possible previous geriatric exposures | Yes; reporting bias: only listing of qualitative responses that agreed, no attention paid to individual responses; little | Yes; if a later specialization was indicated, a subject area preference had to be stated, even if it was still undecided;                                   | Yes; the data of the comparison group come from a previous survey (changes over time)                       |

|                                                                         |                                                                                                                                                                                                                                                                  |                                                                                                                                                           |                                                                                                                                                                                                                      |                                                                                                                                 |                                                                                                             |
|-------------------------------------------------------------------------|------------------------------------------------------------------------------------------------------------------------------------------------------------------------------------------------------------------------------------------------------------------|-----------------------------------------------------------------------------------------------------------------------------------------------------------|----------------------------------------------------------------------------------------------------------------------------------------------------------------------------------------------------------------------|---------------------------------------------------------------------------------------------------------------------------------|-------------------------------------------------------------------------------------------------------------|
|                                                                         |                                                                                                                                                                                                                                                                  |                                                                                                                                                           | critical consideration of own study                                                                                                                                                                                  | significance level was set at p<0.0017                                                                                          |                                                                                                             |
| <b>Quality criterion</b>                                                | <b>Greene et al. [2015]<sup>114</sup></b>                                                                                                                                                                                                                        | <b>Grimm et al. [2017]<sup>115</sup></b>                                                                                                                  | <b>Guilloux et al. [2019]<sup>116</sup></b>                                                                                                                                                                          | <b>Guraya and Almaramhy [2018]<sup>117</sup></b>                                                                                | <b>Gutiérrez-Cirlos et al. [2019]<sup>118</sup></b>                                                         |
| <b>Research question</b>                                                | Yes                                                                                                                                                                                                                                                              | Yes                                                                                                                                                       | Yes                                                                                                                                                                                                                  | Yes                                                                                                                             | Yes                                                                                                         |
| <b>Preregistration</b>                                                  | No statement                                                                                                                                                                                                                                                     | No statement                                                                                                                                              | No statement                                                                                                                                                                                                         | No statement                                                                                                                    | No statement                                                                                                |
| <b>Study-population</b>                                                 | Yes; randomization: none; representativeness: no assessment possible; selection bias: recruitment based on applications (= primary interest)                                                                                                                     | Yes; randomization: none; representativeness: partly (gender ratio)                                                                                       | Yes; randomization: none; representativeness: given (mathematical adjustment to ensure representativeness of responses across all demographic groups); selection bias: differences in response rates between regions | Yes; randomization: none; representativeness: no assessment possible; selection bias: overrepresentation of female participants | Yes; randomization: none; representativeness: none (for the research objective)                             |
| <b>Exposition and outcome</b>                                           | Yes                                                                                                                                                                                                                                                              | Yes                                                                                                                                                       | Yes                                                                                                                                                                                                                  | Yes                                                                                                                             | Yes                                                                                                         |
| <b>Exposure measure(s), exposure levels</b>                             | Yes                                                                                                                                                                                                                                                              | Yes                                                                                                                                                       | Yes; performance bias/confounding: possible differences between included universities                                                                                                                                | Yes                                                                                                                             | Yes                                                                                                         |
| <b>Definition of result, result measurement, number of measurements</b> | Yes; use of previously used questionnaires (University of Ottawa Skills and Simulation Centre (uOSSC) evaluation sheet); multiple interviews: before and after the program; measurement bias: specification of a restricted subject area preference selection    | Yes; no pilot testing                                                                                                                                     | Yes; validation of survey                                                                                                                                                                                            | Yes; no pilot testing                                                                                                           | Yes; validation of measuring instrument                                                                     |
| <b>Follow-up</b>                                                        | Start to end of program (choice of specialty not included)                                                                                                                                                                                                       | /                                                                                                                                                         | /                                                                                                                                                                                                                    | /                                                                                                                               | Start to end of study (choice of specialty not included)                                                    |
| <b>Statistical analysis and limitations</b>                             | Yes; subjective evaluation; tendency to positive evaluation by pre-clinical participants, (possibly first encounter with a clinical specialty, associated euphoria/enthusiasm for the first clinical experience, no competition from other clinical specialties) | Yes; aim of a gender-specific survey (however, significantly lower proportion of female participants, which is nevertheless representative for the field) | Yes; significance level was set at p<0.009; identified significant influencing factors could only explain 6.3% of the variance                                                                                       | Low; only presentation of absolute and relative frequencies                                                                     | Yes                                                                                                         |
| <b>Quality criterion</b>                                                | <b>Gutmann et al. [2019]<sup>119</sup></b>                                                                                                                                                                                                                       | <b>Hagopian et al. [2015]<sup>120</sup></b>                                                                                                               | <b>Halaas et al. [2008]<sup>121</sup></b>                                                                                                                                                                            | <b>Hammoud et al. [2006]<sup>122</sup></b>                                                                                      | <b>Harris et al. [2005]<sup>123</sup></b>                                                                   |
| <b>Research question</b>                                                | Yes                                                                                                                                                                                                                                                              | Yes                                                                                                                                                       | Yes                                                                                                                                                                                                                  | Yes                                                                                                                             | Yes                                                                                                         |
| <b>Preregistration</b>                                                  | No statement                                                                                                                                                                                                                                                     | No statement                                                                                                                                              | No statement                                                                                                                                                                                                         | No statement                                                                                                                    | No statement                                                                                                |
| <b>Study-population</b>                                                 | Yes; randomization: none; representativeness: partly (allopathic universities); selection bias: no inclusion of                                                                                                                                                  | Yes; randomization: none; representativeness: partly; selection bias: different participant rates per year                                                | Yes; randomization: none; representativeness: partly; selection bias: voluntary participation (= primary interest),                                                                                                  | Yes; randomization: none; representativeness: partly (gender) - none for the research objective; selection bias:                | Yes; randomization: none; representativeness: partly (authors' statement) - none for the research objective |

|                                                                         |                                                                                                                                                                    |                                                                                                                                                                                                                                                                                                                                                    |                                                                                                       |                                                                                                                                |                                                                                                     |
|-------------------------------------------------------------------------|--------------------------------------------------------------------------------------------------------------------------------------------------------------------|----------------------------------------------------------------------------------------------------------------------------------------------------------------------------------------------------------------------------------------------------------------------------------------------------------------------------------------------------|-------------------------------------------------------------------------------------------------------|--------------------------------------------------------------------------------------------------------------------------------|-----------------------------------------------------------------------------------------------------|
|                                                                         | osteopathic universities and international physicians                                                                                                              |                                                                                                                                                                                                                                                                                                                                                    | little information on the study population                                                            | overrepresentation of Asian students, underrepresentation of Hispanic students, different proportions of included universities |                                                                                                     |
| <b>Exposition and outcome</b>                                           | Yes                                                                                                                                                                | Yes                                                                                                                                                                                                                                                                                                                                                | Yes                                                                                                   | Yes                                                                                                                            | Yes                                                                                                 |
| <b>Exposure measure(s), exposure levels</b>                             | Yes; performance bias/confounding: possible differences between included universities                                                                              | Yes; performance bias: no uniform implementation                                                                                                                                                                                                                                                                                                   | Yes; performance bias: no uniform implementation, changes in the course of studies                    | Yes; performance bias/confounding: possible differences between included universities                                          | Yes                                                                                                 |
| <b>Definition of result, result measurement, number of measurements</b> | Yes; using the results of validated questionnaires (start: Matriculating Student Questionnaire (MSQ), end: Medical School Graduation Questionnaire (GQ), the AAMC) | Yes; use of valid data („Residency Matching“ data)                                                                                                                                                                                                                                                                                                 | Yes; no pilot testing and use of valid data (database); multiple survey: continuously every 3 years   | Yes; no pilot testing; multiple interviews: before and after the internship                                                    | Yes; pilot testing                                                                                  |
| <b>Follow-up</b>                                                        | Start to end of study (choice of specialty not included)                                                                                                           | Comparison with Residency Matching data                                                                                                                                                                                                                                                                                                            | Up to 36 years (choice of specialty included)                                                         | Start to end of clerkship (choice of specialty not included)                                                                   | /                                                                                                   |
| <b>Statistical analysis and limitations</b>                             | Yes                                                                                                                                                                | Only absolute and relative frequencies are given; subject preference may already have existed before the internship; no objective verification of subjective statements; often retrospective entry of data (recall bias); confounding: due to other influencing factors within the framework of the internship (supervision, number of operations) | Yes; missing definitions; recall bias: increasing with the number of years between program and survey | Yes; possible difference between "responders" and "non-responders"; overestimation of the effect for "Hispanics"               | Yes; OR data without indication of the CI; reporting bias: exclusion of the specialty "dermatology" |

| Quality criterion                           | Hassoulas et al. [2017] <sup>124</sup>                                                                                                                                           | Hauer et al. [2008a] <sup>125</sup>                                                                                                                                        | Hauer et al. [2008b] <sup>126</sup>                                                   | Hawthorne and Dinh [2017] <sup>127</sup>           | Henderson et al. [1996] <sup>130</sup>                                                                                          |
|---------------------------------------------|----------------------------------------------------------------------------------------------------------------------------------------------------------------------------------|----------------------------------------------------------------------------------------------------------------------------------------------------------------------------|---------------------------------------------------------------------------------------|----------------------------------------------------|---------------------------------------------------------------------------------------------------------------------------------|
| <b>Research question</b>                    | No clear formulation                                                                                                                                                             | Yes                                                                                                                                                                        | Yes                                                                                   | Yes                                                | Yes                                                                                                                             |
| <b>Preregistration</b>                      | No statement                                                                                                                                                                     | No statement                                                                                                                                                               | No statement                                                                          | No statement                                       | No statement                                                                                                                    |
| <b>Study-population</b>                     | Yes; randomization: none; representativeness: no assessment possible; selection bias: no description of the recruitment strategy, no socio-demographic information on the sample | Yes; randomization: none; representativeness: given (authors' statement); selection bias: different proportions and response rates of the individual universities included | Yes; randomization: none; representativeness: partly                                  | Yes; randomization: none; representativeness: none | Yes; randomization: none, simple blinding; Representativeness: none; Selection bias: Recruitment after a lecture or examination |
| <b>Exposition and outcome</b>               | Yes                                                                                                                                                                              | Yes                                                                                                                                                                        | Yes                                                                                   | Yes                                                | Yes                                                                                                                             |
| <b>Exposure measure(s), exposure levels</b> | Yes; performance bias/confounding: possible differences between included universities                                                                                            | Yes; performance bias/confounding: possible differences between included universities                                                                                      | Yes; performance bias/confounding: possible differences between included universities | Yes                                                | Yes; performance bias: no uniform implementation                                                                                |

|                                                                         |                                                                                                                |                                                                                    |                                                                                                                                                                                                                                                                    |                                                                          |                                                                                                                  |
|-------------------------------------------------------------------------|----------------------------------------------------------------------------------------------------------------|------------------------------------------------------------------------------------|--------------------------------------------------------------------------------------------------------------------------------------------------------------------------------------------------------------------------------------------------------------------|--------------------------------------------------------------------------|------------------------------------------------------------------------------------------------------------------|
| <b>Definition of result, result measurement, number of measurements</b> | Yes; no pilot testing                                                                                          | Yes; pilot testing                                                                 | Yes; validation                                                                                                                                                                                                                                                    | Yes; no pilot testing; multiple interviews: before and after the course  | Yes; no pilot testing; measurement bias: no uniform implementation; multiple survey: before and after internship |
| <b>Follow-up</b>                                                        | /                                                                                                              | /                                                                                  | /                                                                                                                                                                                                                                                                  | Start to end of course (choice of specialty not included)                | Start to end of clerkship (choice of specialty not included)                                                     |
| <b>Statistical analysis and limitations</b>                             | Only indication of absolute and relative frequencies; so far, investigation of the effect of only one CBL case | Yes; bias: remuneration of participation; significance level was set at $p < 0.01$ | Yes; indirect data collection; response according to social desirability/wishful thinking: effect may have been overestimated by the directors themselves; confounding: factor analysis identified influencing factors that explain only about 50% of the variance | Yes; Confounding: possible previous general medical internships/exposure | Yes; bias: time of measurement (final exam)                                                                      |

| <b>Quality criterion</b>                                                | <b>Henderson et al. [2002]<sup>129</sup></b>                                                                                                                                            | <b>Higgins and Thomson [2019]<sup>133</sup></b>                                                                   | <b>Histing et al. [2013]<sup>134</sup></b>                                                                                                                                                                                                   | <b>Hofhansl and Körmöczí [2014]<sup>135</sup></b>                                                                                                                                                       | <b>Holm-Petersen et al. [2007]<sup>136</sup></b>                                                                                                                              |
|-------------------------------------------------------------------------|-----------------------------------------------------------------------------------------------------------------------------------------------------------------------------------------|-------------------------------------------------------------------------------------------------------------------|----------------------------------------------------------------------------------------------------------------------------------------------------------------------------------------------------------------------------------------------|---------------------------------------------------------------------------------------------------------------------------------------------------------------------------------------------------------|-------------------------------------------------------------------------------------------------------------------------------------------------------------------------------|
| <b>Research question</b>                                                | Yes                                                                                                                                                                                     | Yes                                                                                                               | Yes                                                                                                                                                                                                                                          | Yes                                                                                                                                                                                                     | Yes                                                                                                                                                                           |
| <b>Preregistration</b>                                                  | No statement                                                                                                                                                                            | No statement                                                                                                      | No statement                                                                                                                                                                                                                                 | No statement                                                                                                                                                                                            | No statement                                                                                                                                                                  |
| <b>Study-population</b>                                                 | Yes; randomization: none; representativeness: partly (for the included universities) - none for the research objective; different information on the sample in abstract and methodology | Low; randomization: none; representativeness: no assessment possible; selection bias: 16% missing sex information | Yes; randomization: none; representativeness: partly (gender) for the included university, but no target group specification in the research objective; selection bias: voluntary participation (= primary interest); only clinical students | Yes; randomization: none; representativeness: no assessment possible; no socio-demographic data available for the year of data collection; selection bias: voluntary participation (= primary interest) | Yes; randomization: none; representativeness: given (authors' statement); selection bias: no indication of response rates and proportions of individual included universities |
| <b>Exposition and outcome</b>                                           | Yes                                                                                                                                                                                     | Yes                                                                                                               | Yes                                                                                                                                                                                                                                          | Yes                                                                                                                                                                                                     | Yes                                                                                                                                                                           |
| <b>Exposure measure(s), exposure levels</b>                             | Yes; performance bias/confounding: possible differences between the included universities (according to the authors' statement, the curricula are the same)                             | Yes                                                                                                               | Yes                                                                                                                                                                                                                                          | Yes; performance bias: no uniform implementation                                                                                                                                                        | Yes; performance bias/confounding: possible differences between included universities                                                                                         |
| <b>Definition of result, result measurement, number of measurements</b> | Yes; no pilot testing; measurement bias: no uniform implementation                                                                                                                      | Yes; no pilot testing; multiple interviews: before and after the course                                           | Yes; no pilot testing; multiple interviews: before and after the course                                                                                                                                                                      | Yes; no pilot testing                                                                                                                                                                                   | Yes; no pilot testing; measurement bias: no uniform implementation; multiple interviews: Baseline and post-internship                                                         |
| <b>Follow-up</b>                                                        | /                                                                                                                                                                                       | Start to end of course (choice of specialty not included)                                                         | Start to end of course (choice of specialty not included)                                                                                                                                                                                    | /                                                                                                                                                                                                       | Baseline to end of clerkship (choice of specialty not included)                                                                                                               |
| <b>Statistical analysis and limitations</b>                             | Yes; answering according to social desirability: distribution of questionnaires by known general practitioners                                                                          | Yes; gender-specific statements with 16% "missing" data                                                           | Only indication of absolute and relative frequencies; no critical consideration of own study                                                                                                                                                 | Only submission of absolute and relative frequencies; bias: free mentor selection (already                                                                                                              | Yes                                                                                                                                                                           |

|                                                                         |                                                                                                                                                                                                    |                                                                                                                                                                                                                 |                                                                                                                                                                 |                                                                                                                                              |                                                                                                                                      |
|-------------------------------------------------------------------------|----------------------------------------------------------------------------------------------------------------------------------------------------------------------------------------------------|-----------------------------------------------------------------------------------------------------------------------------------------------------------------------------------------------------------------|-----------------------------------------------------------------------------------------------------------------------------------------------------------------|----------------------------------------------------------------------------------------------------------------------------------------------|--------------------------------------------------------------------------------------------------------------------------------------|
|                                                                         |                                                                                                                                                                                                    |                                                                                                                                                                                                                 |                                                                                                                                                                 | existing friendships, acquaintances, etc.)                                                                                                   |                                                                                                                                      |
| <b>Quality criterion</b>                                                | <b>Holt et al. [2019]<sup>137</sup></b>                                                                                                                                                            | <b>Hon et al. [2021]<sup>138</sup></b>                                                                                                                                                                          | <b>Hor et al. [2019]<sup>139</sup></b>                                                                                                                          | <b>Howe and Ives [2001]<sup>140</sup></b>                                                                                                    | <b>Hunt et al. [1995]<sup>141</sup></b>                                                                                              |
| <b>Research question</b>                                                | Yes                                                                                                                                                                                                | Yes                                                                                                                                                                                                             | Yes                                                                                                                                                             | No clear formulation                                                                                                                         | Yes                                                                                                                                  |
| <b>Preregistration</b>                                                  | No statement                                                                                                                                                                                       | No statement                                                                                                                                                                                                    | No statement                                                                                                                                                    | No statement                                                                                                                                 | No statement                                                                                                                         |
| <b>Study-population</b>                                                 | Yes; randomization: none; representativeness: none; selection bias: recruitment of participants on the basis of applications (= primary interest)                                                  | Yes; randomization: none, but random selection from the applicant pool; representativeness: none; selection bias: voluntary participation (= primary interest) Overrepresentation 2 <sup>nd</sup> year of study | Yes; randomization: none; representativeness: given (authors' statement); selection bias: recruitment after a teaching unit                                     | Yes; randomization: none; representativeness: no assessment possible (authors' statement)                                                    | Yes; Randomization: none; Representativeness: no assessment possible; Selection bias: no socio-demographic information on the sample |
| <b>Exposition and outcome</b>                                           | Yes                                                                                                                                                                                                | Yes                                                                                                                                                                                                             | Yes                                                                                                                                                             | Yes                                                                                                                                          | Yes                                                                                                                                  |
| <b>Exposure measure(s), exposure levels</b>                             | Yes; performance bias/confounding: possible differences between supervisors                                                                                                                        | Yes                                                                                                                                                                                                             | Yes                                                                                                                                                             | Yes                                                                                                                                          | Yes; performance bias/confounding: possible differences between supervisors                                                          |
| <b>Definition of result, result measurement, number of measurements</b> | Yes; no pilot testing and use of validated questionnaires (ATP-30); multiple interviews: Baseline, 1, 2 and 3 years later                                                                          | Yes; no pilot testing                                                                                                                                                                                           | Yes; no pilot testing and use of validated questionnaires (ATP-30); multiple survey: before and after rotation, as well as end of 5 <sup>th</sup> year of study | Yes; pilot testing; measurement bias: no uniform implementation; multiple interviews: before and after the program                           | Yes; no pilot testing; multiple interviews: before and after the course                                                              |
| <b>Follow-up</b>                                                        | 3 years (choice of specialty not included)                                                                                                                                                         | /                                                                                                                                                                                                               | 2 years (choice of specialty not included)                                                                                                                      | 1 year (choice of specialty not included)                                                                                                    | Start to end of course (choice of specialty not included)                                                                            |
| <b>Statistical analysis and limitations</b>                             | Yes; data gaps; confounding/bias: further psychiatric exposures (independent of the program studied) during the course, insufficient adherence of students/no execution of the program as intended | Yes; recall bias: specialist preference before the course was assessed by post-course questionnaire; social desirability response: subjective assessment of knowledge gain and surgical skills                  | Yes                                                                                                                                                             | Yes; incorrect presentation of the results in the tables; conflict of interest: first author is designer/coordinator of the "new" curriculum | Yes; significance level was set at p<0.1                                                                                             |

|                          |                                                                                                                              |                                                                                                  |                                                                                                                                                                                                                                                                                          |                                                                                                                             |                                                      |
|--------------------------|------------------------------------------------------------------------------------------------------------------------------|--------------------------------------------------------------------------------------------------|------------------------------------------------------------------------------------------------------------------------------------------------------------------------------------------------------------------------------------------------------------------------------------------|-----------------------------------------------------------------------------------------------------------------------------|------------------------------------------------------|
| <b>Quality criterion</b> | <b>Huntington et al. [2014]<sup>142</sup></b>                                                                                | <b>Ibrahim et al. [2016]<sup>143</sup></b>                                                       | <b>Ibrahim et al. [2014]<sup>144</sup></b>                                                                                                                                                                                                                                               | <b>Jagadeesan et al. [2014]<sup>145</sup></b>                                                                               | <b>Jayakumar et al. [2016]<sup>146</sup></b>         |
| <b>Research question</b> | Yes                                                                                                                          | Yes                                                                                              | Yes                                                                                                                                                                                                                                                                                      | Yes                                                                                                                         | Yes                                                  |
| <b>Preregistration</b>   | No statement                                                                                                                 | No statement                                                                                     | No statement                                                                                                                                                                                                                                                                             | No statement                                                                                                                | No statement                                         |
| <b>Study-population</b>  | Yes; randomization: none; representativeness: none; selection bias: consideration of applicants to only one training program | Yes; randomization: none; representativeness: given (authors' statement: regarding gender ratio) | Yes; randomization: none; representativeness: given (authors' statement: gender distribution, proportion of graduates), none (proportion of students in their final year of study, low response rate); selection bias: no representation of the different response rates and proportions | Yes; randomization: none; representativeness: none; selection bias: only use of questionnaires from allopathic universities | Yes; randomization: none; representativeness: partly |

|                                                                         |                                                                                                    |                                                                                      |                                                                                      |                                                                                                          |                                                                                                                         |
|-------------------------------------------------------------------------|----------------------------------------------------------------------------------------------------|--------------------------------------------------------------------------------------|--------------------------------------------------------------------------------------|----------------------------------------------------------------------------------------------------------|-------------------------------------------------------------------------------------------------------------------------|
| <b>Exposition and outcome</b>                                           | Yes                                                                                                | Yes                                                                                  | Yes                                                                                  | Yes                                                                                                      | Yes                                                                                                                     |
| <b>Exposure measure(s), exposure levels</b>                             | Yes; performance bias/confounding: possible differences between university education               | Yes; performance bias/confounding: possible differences between university education | Yes; performance bias/confounding: possible differences between university education | Yes; performance bias/confounding: possible differences between university education                     | Yes; performance bias/confounding: possible differences between included universities; curricular changes in the course |
| <b>Definition of result, result measurement, number of measurements</b> | Yes; no pilot testing                                                                              | Yes; pilot testing                                                                   | Yes; pilot testing                                                                   | Yes; no pilot testing; measurement bias/information bias: only indication of up to 4 clerkships possible | Yes; no pilot testing                                                                                                   |
| <b>Follow-up</b>                                                        | /                                                                                                  | /                                                                                    | /                                                                                    | /                                                                                                        | /                                                                                                                       |
| <b>Statistical analysis and limitations</b>                             | Yes; bias: remuneration of participation (lottery pool); susceptibility to interpretation of items | Yes; low critical consideration of own study                                         | Yes                                                                                  | Yes                                                                                                      | Yes                                                                                                                     |

|                                                                         |                                                                                                                                                                                                                               |                                                                                                                                      |                                                                          |                                                                                                                                                      |                                                                                                                                                                          |
|-------------------------------------------------------------------------|-------------------------------------------------------------------------------------------------------------------------------------------------------------------------------------------------------------------------------|--------------------------------------------------------------------------------------------------------------------------------------|--------------------------------------------------------------------------|------------------------------------------------------------------------------------------------------------------------------------------------------|--------------------------------------------------------------------------------------------------------------------------------------------------------------------------|
| <b>Quality criterion</b>                                                | <b>Johnson et al. [2012]<sup>147</sup></b>                                                                                                                                                                                    | <b>Joiner et al. [2017]<sup>148</sup></b>                                                                                            | <b>Kaderli et al. [2011]<sup>149</sup></b>                               | <b>Kahn et al. [2011]<sup>150</sup></b>                                                                                                              | <b>Kansayisa et al. [2018]<sup>151</sup></b>                                                                                                                             |
| <b>Research question</b>                                                | Yes                                                                                                                                                                                                                           | Yes                                                                                                                                  | Yes                                                                      | Yes                                                                                                                                                  | Yes                                                                                                                                                                      |
| <b>Preregistration</b>                                                  | No statement                                                                                                                                                                                                                  | No statement                                                                                                                         | No statement                                                             | No statement                                                                                                                                         | No statement                                                                                                                                                             |
| <b>Study-population</b>                                                 | Yes; randomization: none; representativeness: none; selection bias: only inclusion of 4 <sup>th</sup> year of study                                                                                                           | Yes; randomization: none; representativeness: no assessment possible; selection bias: no socio-demographic information on the sample | Yes; randomization: none; representativeness: no assessment possible     | Yes; randomization: none; representativeness: none; selection bias: no information on response rate and gender ratios of the individual universities | Yes; randomization: none; representativeness: given (authors' statement: gender ratio); selection bias: recruitment during university courses (no compulsory attendance) |
| <b>Exposition and outcome</b>                                           | Yes                                                                                                                                                                                                                           | Yes                                                                                                                                  | Yes                                                                      | Yes                                                                                                                                                  | Yes                                                                                                                                                                      |
| <b>Exposure measure(s), exposure levels</b>                             | Yes; performance bias/confounding: possible differences between included universities and university education/training programs                                                                                              | Yes; performance bias/confounding: possible differences between included institutions                                                | Yes; performance bias: no uniform implementation                         | Yes; performance bias/confounding: possible differences between included universities                                                                | Yes; performance bias/confounding: possible differences between included institutions                                                                                    |
| <b>Definition of result, result measurement, number of measurements</b> | Yes; pilot testing                                                                                                                                                                                                            | Yes; no pilot testing; multiple interviews: start, 2 <sup>nd</sup> week and 3 <sup>rd</sup> week or end                              | Yes; pilot testing; multiple interviews: before and after the internship | Yes; no pilot testing                                                                                                                                | Yes; no pilot testing                                                                                                                                                    |
| <b>Follow-up</b>                                                        | /                                                                                                                                                                                                                             | 4 months (choice of specialty not included)                                                                                          | Start to end of clerkship (choice of specialty not included)             | /                                                                                                                                                    | /                                                                                                                                                                        |
| <b>Statistical analysis and limitations</b>                             | Yes; concentration on trend information, not on significance; different total numbers for different questions (incomplete questionnaires were also included); weak significance for the group of female orthopedic applicants | Only indication of absolute and relative frequencies                                                                                 | Yes                                                                      | Yes; conflict of interest/response according to social desirability: one of the authors lectures in burn surgery at one of the included universities | Yes; bias: no exposure to all subject areas yet (only the "core areas")                                                                                                  |

|                          |                                              |                                            |                                              |                                    |                                           |
|--------------------------|----------------------------------------------|--------------------------------------------|----------------------------------------------|------------------------------------|-------------------------------------------|
| <b>Quality criterion</b> | <b>Kapoor and Smith [2014]<sup>152</sup></b> | <b>Karmali et al. [2018]<sup>153</sup></b> | <b>Kassebaum et al. [1996]<sup>154</sup></b> | <b>Keepes [1995]<sup>155</sup></b> | <b>Khader et al. [2008]<sup>157</sup></b> |
| <b>Research question</b> | Yes                                          | Yes                                        | Yes                                          | Yes                                | Yes                                       |

|                                                                         |                                                                                                                                                                                                                                                                                                                  |                                                                                                                                                                                             |                                                                                           |                                                                                                                                      |                                                                                                                                                                                                    |
|-------------------------------------------------------------------------|------------------------------------------------------------------------------------------------------------------------------------------------------------------------------------------------------------------------------------------------------------------------------------------------------------------|---------------------------------------------------------------------------------------------------------------------------------------------------------------------------------------------|-------------------------------------------------------------------------------------------|--------------------------------------------------------------------------------------------------------------------------------------|----------------------------------------------------------------------------------------------------------------------------------------------------------------------------------------------------|
| <b>Preregistration</b>                                                  | No statement                                                                                                                                                                                                                                                                                                     | No statement                                                                                                                                                                                | No statement                                                                              | No statement                                                                                                                         | No statement                                                                                                                                                                                       |
| <b>Study-population</b>                                                 | Yes; randomization: none; representativeness: none; selection bias: as an introductory question, question about the existence of a radiology curriculum (universities without a radiology curriculum were discouraged from participating)                                                                        | Yes; randomization: none; representativeness: none; selection bias: course costs, voluntary participation (= primary interest)                                                              | Yes; randomization: none; representativeness: given                                       | Yes; randomization: none; representativeness: no assessment possible; selection bias: no socio-demographic information on the sample | Yes; randomization: none; representativeness: no assessment possible; selection bias: recruitment of 2 <sup>nd</sup> , 4 <sup>th</sup> and 6 <sup>th</sup> year students due to their availability |
| <b>Exposition and outcome</b>                                           | Yes                                                                                                                                                                                                                                                                                                              | Yes                                                                                                                                                                                         | Yes                                                                                       | Yes                                                                                                                                  | Yes                                                                                                                                                                                                |
| <b>Exposure measure(s), exposure levels</b>                             | Yes; performance bias/confounding: possible differences between the included universities, possible curricular changes in the course of studies                                                                                                                                                                  | Yes                                                                                                                                                                                         | Yes; performance bias/confounding: possible differences between the included universities | Yes                                                                                                                                  | Yes                                                                                                                                                                                                |
| <b>Definition of result, result measurement, number of measurements</b> | Yes; no pilot testing and use of valid data from databases (Electronic Residency Application Service (ERAS))                                                                                                                                                                                                     | Yes; no pilot testing; multiple interviews: before and after the course                                                                                                                     | Yes; use of a validated, national survey                                                  | Yes; no pilot testing                                                                                                                | Yes; no pilot testing                                                                                                                                                                              |
| <b>Follow-up</b>                                                        | /                                                                                                                                                                                                                                                                                                                | Start to end of course (choice of specialty not included)                                                                                                                                   | Start to end of study (choice of specialty not included)                                  | /                                                                                                                                    | /                                                                                                                                                                                                  |
| <b>Statistical analysis and limitations</b>                             | Yes; response according to social desirability: tendency towards positivity, subjective statements of the directors about their radiology curriculum; examination of the total number of radiology applicants over 5 years (per university), no annual analysis of possible correlations with curricular changes | Yes; survey of specialist preference only after the course; bias: identical pre- and post-questionnaire; to assess the acquisition of technical skills, only one of 8 stations was assessed | Yes; no critical consideration of own study                                               | Yes; no critical consideration of own study                                                                                          | Yes; no critical consideration of own study                                                                                                                                                        |

|                               |                                                                      |                                                                                                                                                                                    |                                                                                                                                      |                                                                                                                                                                                                                                              |                                                                                                                                                |
|-------------------------------|----------------------------------------------------------------------|------------------------------------------------------------------------------------------------------------------------------------------------------------------------------------|--------------------------------------------------------------------------------------------------------------------------------------|----------------------------------------------------------------------------------------------------------------------------------------------------------------------------------------------------------------------------------------------|------------------------------------------------------------------------------------------------------------------------------------------------|
| <b>Quality criterion</b>      | <b>Khater-Menassa and Major [2005]<sup>158</sup></b>                 | <b>Knox et al. [2008]<sup>159</sup></b>                                                                                                                                            | <b>Kolasinski et al. [2007]<sup>160</sup></b>                                                                                        | <b>Kost et al. [2019]<sup>161</sup></b>                                                                                                                                                                                                      | <b>Kozar et al. [2003]<sup>163</sup></b>                                                                                                       |
| <b>Research question</b>      | Yes                                                                  | Yes                                                                                                                                                                                | Yes                                                                                                                                  | Yes                                                                                                                                                                                                                                          | Yes                                                                                                                                            |
| <b>Preregistration</b>        | No statement                                                         | No statement                                                                                                                                                                       | No statement                                                                                                                         | No statement                                                                                                                                                                                                                                 | No statement                                                                                                                                   |
| <b>Study-population</b>       | Yes; randomization: none; representativeness: no assessment possible | Yes; randomization: none; representativeness: no assessment possible; selection bias: no precise socio-demographic information on the sample; overrepresentation of one university | Yes; randomization: none; representativeness: no assessment possible; selection bias: no socio-demographic information on the sample | Yes; randomization: none; representativeness: no assessment possible; selection bias: no socio-demographic information on the sample; only recruitment of members of the "American Academy of Family Physicians (AAFP)" (= primary interest) | Yes; randomization: none; representativeness: none; selection bias: voluntary participation (= primary interest); missing gender-specific data |
| <b>Exposition and outcome</b> | Yes                                                                  | Yes                                                                                                                                                                                | Yes                                                                                                                                  | Yes                                                                                                                                                                                                                                          | Yes                                                                                                                                            |

|                                                                         |                                        |                                                                                                                                                                          |                                                                                              |                                                                                                                                                                              |                                                                                                                                                                                                                                                                                  |
|-------------------------------------------------------------------------|----------------------------------------|--------------------------------------------------------------------------------------------------------------------------------------------------------------------------|----------------------------------------------------------------------------------------------|------------------------------------------------------------------------------------------------------------------------------------------------------------------------------|----------------------------------------------------------------------------------------------------------------------------------------------------------------------------------------------------------------------------------------------------------------------------------|
| <b>Exposure measure(s), exposure levels</b>                             | Yes                                    | Yes; performance bias/confounding: possible differences between included universities                                                                                    | Yes; performance bias/confounding: possible differences between included institutions        | Yes; performance bias/confounding: possible differences between included universities                                                                                        | Yes                                                                                                                                                                                                                                                                              |
| <b>Definition of result, result measurement, number of measurements</b> | Yes; pilot testing                     | Yes; no pilot testing                                                                                                                                                    | Yes; no pilot testing                                                                        | Yes; no pilot testing; measurement bias: only if the intention of further training in general medicine is stated further questioning regarding faculty support and mentoring | Yes; no pilot testing; multiple interviews before and after the course                                                                                                                                                                                                           |
| <b>Follow-up</b>                                                        | /                                      | /                                                                                                                                                                        | /                                                                                            | /                                                                                                                                                                            | Start to end of course (choice of specialty not included)                                                                                                                                                                                                                        |
| <b>Statistical analysis and limitations</b>                             | Yes; bias: time of survey (final exam) | Yes; bias: time of survey (final examination); response according to social desirability: study conducted by employees of one of the universities included in the survey | Only indication of absolute and relative frequencies; no critical consideration of own study | Yes; identified influencing factors explain approx. 50% of the variance                                                                                                      | Yes; tendency to positive evaluation by preclinical participants, (possibly first encounter with a clinical specialty, associated euphoria/enthusiasm for the first clinical experience, no competition from other clinical specialties); no critical consideration of own study |

| <b>Quality criterion</b>                                                | <b>Kraft et al. [2018]<sup>164</sup></b>                                                                                             | <b>Kreykes et al. [2020]<sup>165</sup></b>                                                                                                                              | <b>Kuhnigk et al. [2009]<sup>166</sup></b>                                                                                                     | <b>Kumar and Dhaliwal [2011]<sup>167</sup></b>                                                                                                                      | <b>Kumar et al. [2019]<sup>168</sup></b>                                                                                                                                 |
|-------------------------------------------------------------------------|--------------------------------------------------------------------------------------------------------------------------------------|-------------------------------------------------------------------------------------------------------------------------------------------------------------------------|------------------------------------------------------------------------------------------------------------------------------------------------|---------------------------------------------------------------------------------------------------------------------------------------------------------------------|--------------------------------------------------------------------------------------------------------------------------------------------------------------------------|
| <b>Research question</b>                                                | Yes                                                                                                                                  | Yes                                                                                                                                                                     | Yes                                                                                                                                            | Yes                                                                                                                                                                 | Yes                                                                                                                                                                      |
| <b>Preregistration</b>                                                  | No statement                                                                                                                         | No statement                                                                                                                                                            | No statement                                                                                                                                   | No statement                                                                                                                                                        | No statement                                                                                                                                                             |
| <b>Study-population</b>                                                 | Yes; randomization: none; representativeness: no assessment possible; selection bias; no socio-demographic information on the sample | Yes; randomization: none; representativeness: none; selection bias: voluntary participation (= primary interest), recruitment through social networks and word of mouth | Yes; randomization: none; representativeness: given (authors' statement) - none with regard to the population stated in the research objective | Yes; randomization: none; representativeness: no assessment possible; selection bias: recruitment at university event, voluntary participation (= primary interest) | Yes; randomization: none; representativeness: no assessment possible; selection bias: voluntary participation (= primary interest), overrepresentation preclinical phase |
| <b>Exposition and outcome</b>                                           | Yes                                                                                                                                  | Yes                                                                                                                                                                     | Yes                                                                                                                                            | Yes                                                                                                                                                                 | Yes                                                                                                                                                                      |
| <b>Exposure measure(s), exposure levels</b>                             | Yes                                                                                                                                  | Yes                                                                                                                                                                     | Yes                                                                                                                                            | Yes                                                                                                                                                                 | Yes; performance bias/confounding: possible differences between included universities                                                                                    |
| <b>Definition of result, result measurement, number of measurements</b> | Yes; no pilot testing; multiple interviews: before and after the course                                                              | Yes; pilot testing (and study is itself a pilot study); multiple interviews: before and after the course                                                                | Yes; no pilot testing + use of validated questionnaires (ATP-30); measurement bias: no uniform implementation                                  | Yes; pilot testing                                                                                                                                                  | Yes; no pilot testing; multiple interviews: before and after the elective                                                                                                |
| <b>Follow-up</b>                                                        | Start to end of course (choice of specialty not included)                                                                            | Start to end of course (choice of specialty not included)                                                                                                               | /                                                                                                                                              | /                                                                                                                                                                   | Start to end of elective (choice of specialty not included)                                                                                                              |
| <b>Statistical analysis and limitations</b>                             | Yes; bias: compulsory pre-questionnaire, voluntary completion of post-questionnaire; tendency to                                     | Yes; bias: boarding, identical pre- and post-questionnaire, no pairing of pre- and post-data (limited statement on preference                                           | Yes; answering according to social desirability: presence of the study director                                                                | Yes                                                                                                                                                                 | Yes; decrease of participants in the course (by 54%); tendency to positive evaluation by preclinical participants, (possibly                                             |

|  |                                                                                                                                                                                                                                                                                                        |                                                                                                                                                                                                                                                |  |  |                                                                                                                                                                                               |
|--|--------------------------------------------------------------------------------------------------------------------------------------------------------------------------------------------------------------------------------------------------------------------------------------------------------|------------------------------------------------------------------------------------------------------------------------------------------------------------------------------------------------------------------------------------------------|--|--|-----------------------------------------------------------------------------------------------------------------------------------------------------------------------------------------------|
|  | positive evaluation by pre-clinical participants, (possibly first encounter with a clinical specialty, associated euphoria/enthusiasm for the first clinical experience, no competition from other clinical specialties); no pairing of pre- and post-data (limited statement on change in preference) | change); tendency to positive evaluation by pre-clinical participants, (possibly first encounter with a clinical specialty, associated, euphoria/enthusiasm for the first clinical experience, no competition from other clinical specialties) |  |  | first encounter with a clinical field, associated with this, euphoria/enthusiasm for the first clinical experience, no competition from other clinical fields); partly only average statement |
|--|--------------------------------------------------------------------------------------------------------------------------------------------------------------------------------------------------------------------------------------------------------------------------------------------------------|------------------------------------------------------------------------------------------------------------------------------------------------------------------------------------------------------------------------------------------------|--|--|-----------------------------------------------------------------------------------------------------------------------------------------------------------------------------------------------|

| Quality criterion                                                       | Kurlandsky et al. [1994] <sup>169</sup>                                                                                                                                                            | Kurowecki et al. [2021] <sup>170</sup>                                                                                                                                                                                                                                                                                          | Kuteesa et al. [2021] <sup>171</sup>                                                                                       | Kutikov et al. [2011] <sup>172</sup>                                                                                                                                                                                 | Lampe et al. [2010] <sup>173</sup>                                                                                       |
|-------------------------------------------------------------------------|----------------------------------------------------------------------------------------------------------------------------------------------------------------------------------------------------|---------------------------------------------------------------------------------------------------------------------------------------------------------------------------------------------------------------------------------------------------------------------------------------------------------------------------------|----------------------------------------------------------------------------------------------------------------------------|----------------------------------------------------------------------------------------------------------------------------------------------------------------------------------------------------------------------|--------------------------------------------------------------------------------------------------------------------------|
| <b>Research question</b>                                                | Yes                                                                                                                                                                                                | Yes                                                                                                                                                                                                                                                                                                                             | Yes                                                                                                                        | Yes                                                                                                                                                                                                                  | No clear formulation                                                                                                     |
| <b>Preregistration</b>                                                  | No statement                                                                                                                                                                                       | No statement                                                                                                                                                                                                                                                                                                                    | No statement                                                                                                               | No statement                                                                                                                                                                                                         | No statement                                                                                                             |
| <b>Study-population</b>                                                 | Yes; randomization: none; representativeness: no assessment possible; selection bias: no socio-demographic statements on the sample, different proportions of the individual universities included | Yes; randomization: none; Representativeness: partial; Selection bias: slight deviation from the predominant gender distribution                                                                                                                                                                                                | Yes; randomization: none; representativeness: no assessment possible; selection bias: recruitment at university event      | Yes; randomization: none; representativeness: no assessment possible; selection bias: only inclusion of applicants who were accepted, allopathic universities and universities with at least 1 applicant for urology | Yes; randomization: none; representativeness: none; selection bias: no indication of gender ratio                        |
| <b>Exposition and outcome</b>                                           | Yes                                                                                                                                                                                                | Yes                                                                                                                                                                                                                                                                                                                             | Yes                                                                                                                        | Yes                                                                                                                                                                                                                  | Yes                                                                                                                      |
| <b>Exposure measure(s), exposure levels</b>                             | Yes; performance bias/confounding: possible differences between included universities                                                                                                              | Yes; performance bias/confounding: possible differences between university education                                                                                                                                                                                                                                            | Yes                                                                                                                        | Yes; performance bias/confounding: possible differences between included universities                                                                                                                                | Yes                                                                                                                      |
| <b>Definition of result, result measurement, number of measurements</b> | Yes; examination results and inclusion of subjective assessments; measurement bias: no uniform implementation                                                                                      | Yes; pilot testing                                                                                                                                                                                                                                                                                                              | Yes; pilot testing                                                                                                         | Ja, no pilot testing; use of valid data (Residency-Matching-Data)                                                                                                                                                    | Yes; measurement bias: no uniform implementation                                                                         |
| <b>Follow-up</b>                                                        | /                                                                                                                                                                                                  | /                                                                                                                                                                                                                                                                                                                               | /                                                                                                                          | /                                                                                                                                                                                                                    | /                                                                                                                        |
| <b>Statistical analysis and limitations</b>                             | Yes; community assignment by lottery or own decision                                                                                                                                               | Yes; response according to social desirability: knowledge about the implementation of the study by the radiology institute; influence factor analysis only on the basis of the questionnaires with radiology specialty preference; recall bias: increasing with the number of years between the end of the study and the survey | Yes; no indication whether participation in quantitative survey excluded participation in qualitative survey or vice versa | Yes                                                                                                                                                                                                                  | Yes; recall bias: retrospective survey of specialist preference before the course in the questionnaire after the course. |

| Quality criterion        | Lau et al. [2015] <sup>174</sup> | Lawal and Afolabi [2013] <sup>175</sup> | Lebastchi et al. [2018] <sup>176</sup> | Lee et al. [1995] <sup>177</sup> | Lee et al. [2022] <sup>178</sup> |
|--------------------------|----------------------------------|-----------------------------------------|----------------------------------------|----------------------------------|----------------------------------|
| <b>Research question</b> | Yes                              | Yes                                     | Yes                                    | Inaccurate/low                   | Yes                              |
| <b>Preregistration</b>   | No statement                     | No statement                            | No statement                           | No statement                     | No statement                     |

|                                                                         |                                                                                                                    |                                                                                                                                                                                       |                                                                                                                                                                                                                                       |                                                                                                                                                               |                                                                                                                                                                  |
|-------------------------------------------------------------------------|--------------------------------------------------------------------------------------------------------------------|---------------------------------------------------------------------------------------------------------------------------------------------------------------------------------------|---------------------------------------------------------------------------------------------------------------------------------------------------------------------------------------------------------------------------------------|---------------------------------------------------------------------------------------------------------------------------------------------------------------|------------------------------------------------------------------------------------------------------------------------------------------------------------------|
| <b>Study-population</b>                                                 | Yes; randomization: none; representativeness: given                                                                | Yes; randomization: given (authors' statement); representativeness: none                                                                                                              | Yes; randomization: none; representativeness: no assessment possible; selection bias: no information on the different proportions of the included universities                                                                        | Yes; randomization: none; representativeness: none; selection bias: only inclusion of students with concrete specialist preference and interest in psychiatry | Yes; randomization: none; representativeness: no assessment possible                                                                                             |
| <b>Exposition and outcome</b>                                           | Yes                                                                                                                | Yes                                                                                                                                                                                   | Yes                                                                                                                                                                                                                                   | Yes                                                                                                                                                           | Yes                                                                                                                                                              |
| <b>Exposure measure(s), exposure levels</b>                             | Yes; performance bias/confounding: possible differences between included universities                              | Yes; performance bias/confounding: possible differences between included universities and specialties                                                                                 | Yes; performance bias/confounding: possible differences between university education                                                                                                                                                  | Yes; performance bias/confounding: possible differences between included universities                                                                         | Yes                                                                                                                                                              |
| <b>Definition of result, result measurement, number of measurements</b> | Yes; no pilot testing and use of valid data (residency matching data); measurement bias: no uniform implementation | Yes; no pilot testing                                                                                                                                                                 | Yes; no pilot testing                                                                                                                                                                                                                 | Yes; no pilot testing; study itself is a pilot study                                                                                                          | Yes; use of previously used questionnaires; multiple interviews: before and after the psychiatric curriculum                                                     |
| <b>Follow-up</b>                                                        | /                                                                                                                  | /                                                                                                                                                                                     | /                                                                                                                                                                                                                                     | /                                                                                                                                                             | 4 years (choice of specialty not included)                                                                                                                       |
| <b>Statistical analysis and limitations</b>                             | Yes; answer according to social desirability: tendency to positivity of the leaders; only average data             | Yes; overall evaluation of all 5 years, no consideration of individual years; bias: more positive impression of specialties with high additional income (lucrative private practices) | Yes; no precise indication of a response rate possible (blinding); response according to social desirability: survey after application, but before final selection of further education applicants; double participation not excluded | Yes; no critical consideration of own study                                                                                                                   | Yes; ceiling effect: dichotomisation of categories; studied effect can only be evaluated for the entire psychiatric curriculum and not for individual components |

| <b>Quality criterion</b>                                                | <b>Lee et al. [2011]<sup>179</sup></b>                                                                                                                                      | <b>Lefevre et al. [2010]<sup>180</sup></b>                                                                                                                        | <b>Leong et al. [2005]<sup>181</sup></b>                                                                                                                         | <b>Lindeman et al. [2013]<sup>182</sup></b>                                                                        | <b>López-García et al. [2019]<sup>183</sup></b>                                                                                                                      |
|-------------------------------------------------------------------------|-----------------------------------------------------------------------------------------------------------------------------------------------------------------------------|-------------------------------------------------------------------------------------------------------------------------------------------------------------------|------------------------------------------------------------------------------------------------------------------------------------------------------------------|--------------------------------------------------------------------------------------------------------------------|----------------------------------------------------------------------------------------------------------------------------------------------------------------------|
| <b>Research question</b>                                                | Yes                                                                                                                                                                         | Yes                                                                                                                                                               | Inaccurate/low                                                                                                                                                   | Yes                                                                                                                | Yes                                                                                                                                                                  |
| <b>Preregistration</b>                                                  | No statement                                                                                                                                                                | No statement                                                                                                                                                      | No statement                                                                                                                                                     | No statement                                                                                                       | No statement                                                                                                                                                         |
| <b>Study-population</b>                                                 | Yes; randomization: none; representativeness: no assessment possible; selection bias: voluntary participation (= primary interest), no indication of study year proportions | Yes; randomization: none; representativeness: given (authors' statement); selection bias: only those enrolled in the National Ranking Practice Examination (NRPE) | Yes; randomization: none; representativeness: no assessment possible; selection bias: voluntary participation (= primary interest), lack of gender-specific data | Yes; randomization: none; Representativeness: none; Selection bias: no socio-demographic information on the sample | Yes; randomization: none; representativeness: no assessment possible                                                                                                 |
| <b>Exposition and outcome</b>                                           | Yes                                                                                                                                                                         | Yes                                                                                                                                                               | Yes                                                                                                                                                              | Yes                                                                                                                | Yes                                                                                                                                                                  |
| <b>Exposure measure(s), exposure levels</b>                             | Yes; performance bias/confounding: possible differences between the curricular and university experiences until the follow-up survey                                        | Yes; performance bias/confounding: possible differences between included universities                                                                             | Yes                                                                                                                                                              | Yes; performance bias/confounding: possible differences between included universities                              | Yes; performance bias: no uniform implementation                                                                                                                     |
| <b>Definition of result, result measurement, number of measurements</b> | Yes; no pilot testing and use of validated questionnaires (Global Endovascular Ratings Scale (GERS)); no uniform implementation                                             | Yes; use of validated survey                                                                                                                                      | Yes; pilot testing                                                                                                                                               | Yes; pilot testing                                                                                                 | Yes; exam results and already validated questionnaire (Calculation of Attitudes Towards and Knowledge of Family Medicine Questionnaire (CAMF)); multiple interviews: |

|                                             |                                                                                                                                                                                                                                                                                                                                                                                                                                  |                                                                             |     |                                                                                          |                                                                                                                                                                         |
|---------------------------------------------|----------------------------------------------------------------------------------------------------------------------------------------------------------------------------------------------------------------------------------------------------------------------------------------------------------------------------------------------------------------------------------------------------------------------------------|-----------------------------------------------------------------------------|-----|------------------------------------------------------------------------------------------|-------------------------------------------------------------------------------------------------------------------------------------------------------------------------|
|                                             |                                                                                                                                                                                                                                                                                                                                                                                                                                  |                                                                             |     |                                                                                          | before and after the course, as well as at the end of the study; measurement bias: no uniform implementation                                                            |
| <b>Follow-up</b>                            | Up to 3 years (choice of specialty not included)                                                                                                                                                                                                                                                                                                                                                                                 | /                                                                           | /   | /                                                                                        | 4 years (choice of specialty not included)                                                                                                                              |
| <b>Statistical analysis and limitations</b> | Yes; no use of simulator possible before, but ability assessment on it; indication of overall result (despite different time intervals); tendency to positive evaluation by pre-clinical participants, (possibly first encounter with a clinical specialty, associated, euphoria/enthusiasm for the first clinical experience, no competition from other clinical specialties); conflict of interest: research and funding funds | Yes; bias: time of survey (before application result for further education) | Yes | Yes; no indication of an exact response rate possible (different recruitment strategies) | Yes; low comparability; bias: different time distance from the general medicine course; response according to social desirability: questionnaire handed out by teachers |

| <b>Quality criterion</b>                                                | <b>Lukas et al. [2017]<sup>185</sup></b>                                                                                                                                                                                         | <b>Lyons et al. [2015]<sup>186</sup></b>                                                                                                                                           | <b>Lyons and Janca [2015]<sup>187</sup></b>                                                                                                                                    | <b>MacDowell et al. [2013]<sup>188</sup></b>                                                                     | <b>Madani et al. [2018]<sup>190</sup></b>                                                                                          |
|-------------------------------------------------------------------------|----------------------------------------------------------------------------------------------------------------------------------------------------------------------------------------------------------------------------------|------------------------------------------------------------------------------------------------------------------------------------------------------------------------------------|--------------------------------------------------------------------------------------------------------------------------------------------------------------------------------|------------------------------------------------------------------------------------------------------------------|------------------------------------------------------------------------------------------------------------------------------------|
| <b>Research question</b>                                                | No clear formulation (only in the abstract)                                                                                                                                                                                      | Yes                                                                                                                                                                                | Yes                                                                                                                                                                            | Yes                                                                                                              | Yes                                                                                                                                |
| <b>Preregistration</b>                                                  | No statement                                                                                                                                                                                                                     | No statement                                                                                                                                                                       | No statement                                                                                                                                                                   | No statement                                                                                                     | No statement                                                                                                                       |
| <b>Study-population</b>                                                 | Yes; randomization: none; representativeness: none; selection bias. Recruitment at a national conference; different proportions of the individual training levels (19% missing data), predominance of neurosurgical participants | Yes; randomization: none; representativeness: no assessment possible; selection bias: voluntary participation (= primary interest), different proportions of included universities | Yes; randomization: none; representativeness: none; selection bias: voluntary participation (= primary interest)                                                               | Yes; randomization: none; representativeness: none; selection bias: voluntary participation (= primary interest) | Yes; randomization: random sample; representativeness: no assessment possible; no exact representation of the recruitment strategy |
| <b>Exposition and outcome</b>                                           | Yes                                                                                                                                                                                                                              | Yes                                                                                                                                                                                | Yes                                                                                                                                                                            | Yes                                                                                                              | Yes                                                                                                                                |
| <b>Exposure measure(s), exposure levels</b>                             | Yes; performance bias/confounding: possible differences between individual training levels                                                                                                                                       | Yes; performance bias/confounding: possible differences between included universities                                                                                              | Yes                                                                                                                                                                            | Yes                                                                                                              | Yes                                                                                                                                |
| <b>Definition of result, result measurement, number of measurements</b> | Yes; use of a previously used questionnaire                                                                                                                                                                                      | Yes; no pilot testing; multiple interviews: before and after the program; measurement bias: changes in the questionnaire in the course of the study, no uniform implementation     | Yes; use of validated questionnaires (Balon Attitudes Towards Psychiatry (Balon), Mental Illness Clinicians Attitudes (MICA)); multiple interviews: before and after clerkship | Yes; use of valid data (databases)                                                                               | Yes; validation/pilot testing                                                                                                      |
| <b>Follow-up</b>                                                        | /                                                                                                                                                                                                                                | 1-6 years (choice of specialty included)                                                                                                                                           | Start to end of clerkship (choice of specialty not included)                                                                                                                   | /                                                                                                                | /                                                                                                                                  |

|                                             |     |                                                                                                |                                                                                |                                                             |                                             |
|---------------------------------------------|-----|------------------------------------------------------------------------------------------------|--------------------------------------------------------------------------------|-------------------------------------------------------------|---------------------------------------------|
| <b>Statistical analysis and limitations</b> | Yes | Yes; recall bias: increasing with the number of years between program participation and survey | Yes; no pairing of pre- and post-data (limited statement on preference change) | Yes; no consideration of the time before program initiation | Yes; no critical consideration of own study |
|---------------------------------------------|-----|------------------------------------------------------------------------------------------------|--------------------------------------------------------------------------------|-------------------------------------------------------------|---------------------------------------------|

| Quality criterion                                                       | Mahendran et al. [2015] <sup>191</sup>                                                                                                                                                                    | Maiorova et al. [2008] <sup>192</sup>                           | Malikova et al. [2010] <sup>193</sup>                                                                                                                                                                                                                                                                                                                                     | Manassis et al. [2006] <sup>194</sup>                                                 | Markovic et al. [2012] <sup>195</sup>                                                                                                                                                                                          |
|-------------------------------------------------------------------------|-----------------------------------------------------------------------------------------------------------------------------------------------------------------------------------------------------------|-----------------------------------------------------------------|---------------------------------------------------------------------------------------------------------------------------------------------------------------------------------------------------------------------------------------------------------------------------------------------------------------------------------------------------------------------------|---------------------------------------------------------------------------------------|--------------------------------------------------------------------------------------------------------------------------------------------------------------------------------------------------------------------------------|
| <b>Research question</b>                                                | Yes                                                                                                                                                                                                       | Yes                                                             | Yes                                                                                                                                                                                                                                                                                                                                                                       | Yes                                                                                   | Yes                                                                                                                                                                                                                            |
| <b>Preregistration</b>                                                  | No statement                                                                                                                                                                                              | No statement                                                    | No statement                                                                                                                                                                                                                                                                                                                                                              | No statement                                                                          | No statement                                                                                                                                                                                                                   |
| <b>Study-population</b>                                                 | Yes; randomization: none; representativeness: none; no exact representation of the recruitment strategy; selection bias: low sample representation, different gender ratios for the individual clerkships | Yes; randomization: none; representativeness: none              | Yes; randomization: none; representativeness: none                                                                                                                                                                                                                                                                                                                        | Yes; randomization: none; representativeness: none                                    | Yes; randomization: none, random allocation of applicants to the two application branches; representativeness: none; selection bias: voluntary participation (= primary interest), significant differences between both groups |
| <b>Exposition and outcome</b>                                           | Yes                                                                                                                                                                                                       | Yes                                                             | Yes                                                                                                                                                                                                                                                                                                                                                                       | Yes                                                                                   | Yes                                                                                                                                                                                                                            |
| <b>Exposure measure(s), exposure levels</b>                             | Yes                                                                                                                                                                                                       | Yes; performance bias: no uniform implementation                | Yes                                                                                                                                                                                                                                                                                                                                                                       | Yes; performance bias/confounding: possible differences between included universities | Yes; different intervention branches/application branches                                                                                                                                                                      |
| <b>Definition of result, result measurement, number of measurements</b> | Yes; no pilot testing and use of validated questionnaires (Attitudes to Psychiatry Scale; Dundee Ready Educational Environment Measure); multiple interview: before and after rotation                    | Yes; pilot testing; measurement bias: no uniform implementation | Yes; use of validated questionnaires (the Vascular Surgery Knowledge Questionnaire (VSKQ)); multiple interviews: before and after clerkship; extended questionnaire in case of elective participation                                                                                                                                                                     | Yes; no pilot testing                                                                 | Yes; no pilot testing; multiple interviews: depending on application group                                                                                                                                                     |
| <b>Follow-up</b>                                                        | Start to end of rotation (choice of specialty not included)                                                                                                                                               | Start to end of clerkship (choice of specialty not included)    | Start to end of clerkship (choice of specialty not included)                                                                                                                                                                                                                                                                                                              | /                                                                                     | Start to 3 months after simulation (choice of specialty not included)                                                                                                                                                          |
| <b>Statistical analysis and limitations</b>                             | Yes; no critical consideration of own study                                                                                                                                                               | Yes; analysis of variance                                       | Yes; response according to social desirability: questionnaires handed out by the traineeship supervisors and before the evaluation; information on knowledge gain and skills learned purely subjective; for the identification of influencing factors, only questionnaires of those with participation in a vascular surgery elective were evaluated (= primary interest) | Yes                                                                                   | Yes; bias: remuneration for participation, equating "interest in vascular surgery" and "interest in further training in vascular surgery/specialty choice"; analysis of variance                                               |

| Quality criterion        | Martini et al. [1994] <sup>197</sup> | Matalon et al. [2019] <sup>198</sup> | Matsos et al. [2018] <sup>199</sup> | Matsumoto et al. [2019] <sup>200</sup> | Matthews et al. [2015] <sup>201</sup> |
|--------------------------|--------------------------------------|--------------------------------------|-------------------------------------|----------------------------------------|---------------------------------------|
| <b>Research question</b> | Yes                                  | Yes                                  | Yes                                 | Yes                                    | Yes                                   |

|                                                                         |                                                                                                                                                                                                                                                  |                                                                                                                                                  |                                                                                                                                                            |                                                                                                                                                                                                           |                                                                                                                                                                     |
|-------------------------------------------------------------------------|--------------------------------------------------------------------------------------------------------------------------------------------------------------------------------------------------------------------------------------------------|--------------------------------------------------------------------------------------------------------------------------------------------------|------------------------------------------------------------------------------------------------------------------------------------------------------------|-----------------------------------------------------------------------------------------------------------------------------------------------------------------------------------------------------------|---------------------------------------------------------------------------------------------------------------------------------------------------------------------|
| <b>Preregistration</b>                                                  | No statement                                                                                                                                                                                                                                     | No statement                                                                                                                                     | No statement                                                                                                                                               | No statement                                                                                                                                                                                              | No statement                                                                                                                                                        |
| <b>Study-population</b>                                                 | Yes; randomization: none; representativeness: given (for America) - low generalizability                                                                                                                                                         | Yes; randomization: none; representativeness: none; selection bias: different recruitment strategies                                             | Yes; randomization: none; representativeness: no assessment possible; selection bias: different proportions of individual regions, different gender ratios | Yes; randomization: none; representativeness: none; selection bias: recruitment from "Midwest IR Medical Student Symposium (MIRMSS)" (= primary interest), different proportions of included universities | Yes; randomization: none; representativeness: given (authors' statement); selection bias: recruitment on the basis of an application procedure (= primary interest) |
| <b>Exposition and outcome</b>                                           | Yes                                                                                                                                                                                                                                              | Yes                                                                                                                                              | Yes                                                                                                                                                        | Yes                                                                                                                                                                                                       | Yes                                                                                                                                                                 |
| <b>Exposure measure(s), exposure levels</b>                             | Yes; performance bias: consideration of different years                                                                                                                                                                                          | Yes; performance bias/confounding: possible differences between university education                                                             | Yes; performance bias/confounding: possible differences between university education and training programs                                                 | Yes; performance bias: no uniform implementation                                                                                                                                                          | Yes; performance bias: no uniform implementation                                                                                                                    |
| <b>Definition of result, result measurement, number of measurements</b> | Yes; validation/pilot testing and use of valid data from databases                                                                                                                                                                               | Yes; no pilot testing                                                                                                                            | Yes; no pilot testing                                                                                                                                      | Yes; no pilot testing; measurement bias: no uniform implementation                                                                                                                                        | Yes; no pilot testing                                                                                                                                               |
| <b>Follow-up</b>                                                        | /                                                                                                                                                                                                                                                | /                                                                                                                                                | /                                                                                                                                                          | /                                                                                                                                                                                                         | /                                                                                                                                                                   |
| <b>Statistical analysis and limitations</b>                             | Yes; bias: estimated data; graduates survey and curriculum survey not for the same year: possible curricular changes, so that the curriculum of the graduates surveyed differs from that of the surveyed; no critical consideration of own study | Yes; answering according to social desirability: questionnaire partly handed out by further education directors; no exact response rate possible | Yes; no exact response rate possible; response according to social desirability: questionnaires partly handed out by directors of continuing education     | Yes; the lecture "Women in IR (WIR)" was organized exclusively for female medical students for reasons of space and funding, although 57% of the male participants would also have been interested in it  | Yes; bias: no definition for "rural" vs. "urban"                                                                                                                    |

| <b>Quality criterion</b>                                                | <b>Maudsley et al. [2010]<sup>202</sup></b>                                                                                                            | <b>Mayes et al. [2016]<sup>203</sup></b>                           | <b>Mazeh et al. [2010]<sup>204</sup></b>                                                                                                            | <b>McCaffrey [2005]<sup>205</sup></b>                                                                                                                                                                                                               | <b>McCord et al. [2009]<sup>206</sup></b>                                                                          |
|-------------------------------------------------------------------------|--------------------------------------------------------------------------------------------------------------------------------------------------------|--------------------------------------------------------------------|-----------------------------------------------------------------------------------------------------------------------------------------------------|-----------------------------------------------------------------------------------------------------------------------------------------------------------------------------------------------------------------------------------------------------|--------------------------------------------------------------------------------------------------------------------|
| <b>Research question</b>                                                | Yes                                                                                                                                                    | Yes                                                                | Yes                                                                                                                                                 | Yes                                                                                                                                                                                                                                                 | Yes                                                                                                                |
| <b>Preregistration</b>                                                  | No statement                                                                                                                                           | No statement                                                       | No statement                                                                                                                                        | No statement                                                                                                                                                                                                                                        | No statement                                                                                                       |
| <b>Study-population</b>                                                 | Yes; randomization: none; representativeness: no assessment possible; selection bias: recruitment based on application interviews (= primary interest) | Yes; randomization: none; representativeness: none                 | Yes; randomization: none; representativeness: no assessment possible; selection bias: different proportions/response rates of included universities | Yes; randomization: none; representativeness: none; selection bias: recruitment on the basis of application interviews (= primary interest), different proportions/response rates of included universities, overrepresentation of male participants | Yes; randomization: none; representativeness: no assessment possible; selection bias: missing gender-specific data |
| <b>Exposition and outcome</b>                                           | Yes                                                                                                                                                    | Yes                                                                | Yes                                                                                                                                                 | Yes                                                                                                                                                                                                                                                 | Yes                                                                                                                |
| <b>Exposure measure(s), exposure levels</b>                             | Yes                                                                                                                                                    | Yes                                                                | Yes; performance bias/confounding: possible differences between included universities                                                               | Yes; performance bias/confounding: possible differences between included universities                                                                                                                                                               | Yes; performance bias/confounding: possible differences between university education                               |
| <b>Definition of result, result measurement, number of measurements</b> | Yes; no pilot testing; measurement bias: no uniform implementation                                                                                     | Yes; pilot testing; multiple interviews: before and after rotation | Yes; no pilot testing; different questionnaires                                                                                                     | Yes; no pilot testing                                                                                                                                                                                                                               | Yes; no pilot testing                                                                                              |

|                                             |                                                 |                                                                                        |                                             |                                                                                                   |                                                                                                  |
|---------------------------------------------|-------------------------------------------------|----------------------------------------------------------------------------------------|---------------------------------------------|---------------------------------------------------------------------------------------------------|--------------------------------------------------------------------------------------------------|
| <b>Follow-up</b>                            | 1 to 5 years (choice of specialty not included) | Start to end of rotation (choice of specialty not included)                            | /                                           | /                                                                                                 | /                                                                                                |
| <b>Statistical analysis and limitations</b> | Yes                                             | Yes; mainly absolute and relative frequencies; low critical consideration of own study | Yes; no critical consideration of own study | Yes; different information about the participants; little critical consideration of the own study | Yes; recall bias: increases with the number of years between the end of the study and the survey |

|                                                                         |                                                                                                                                                          |                                                                                                                                                                                                         |                                                                                      |                                                                                                                                                                    |                                                                                                                                              |
|-------------------------------------------------------------------------|----------------------------------------------------------------------------------------------------------------------------------------------------------|---------------------------------------------------------------------------------------------------------------------------------------------------------------------------------------------------------|--------------------------------------------------------------------------------------|--------------------------------------------------------------------------------------------------------------------------------------------------------------------|----------------------------------------------------------------------------------------------------------------------------------------------|
| <b>Quality criterion</b>                                                | <b>McDonald et al. [2021]<sup>207</sup></b>                                                                                                              | <b>McHugh et al. [2011]<sup>208</sup></b>                                                                                                                                                               | <b>McKechnie et al. [2021]<sup>209</sup></b>                                         | <b>McKee et al. [2007]<sup>210</sup></b>                                                                                                                           | <b>McLean [2006]<sup>211</sup></b>                                                                                                           |
| <b>Research question</b>                                                | Yes                                                                                                                                                      | Yes                                                                                                                                                                                                     | Yes                                                                                  | No clear formulation                                                                                                                                               | No clear formulation                                                                                                                         |
| <b>Preregistration</b>                                                  | No statement                                                                                                                                             | No statement                                                                                                                                                                                            | No statement                                                                         | No statement                                                                                                                                                       | No statement                                                                                                                                 |
| <b>Study-population</b>                                                 | Yes; randomization: none; representativeness: none                                                                                                       | Yes; randomization: none; representativeness: no assessment possible; selection bias: recruitment via the database of the "Royal College of Surgeons in Ireland (RCSI)" and a surgical training website | Yes; randomization: none; representativeness: given (authors' statement) - partly    | No; randomization: none; representativeness: none; no selection bias: no socio-demographic information on the sample, voluntary participation (= primary interest) | Yes; randomization: none; representativeness: no assessment possible; no information on recruitment strategy (reference to a previous study) |
| <b>Exposition and outcome</b>                                           | Yes                                                                                                                                                      | Yes                                                                                                                                                                                                     | Yes                                                                                  | Yes                                                                                                                                                                | Yes                                                                                                                                          |
| <b>Exposure measure(s), exposure levels</b>                             | Yes                                                                                                                                                      | Yes; performance bias: possible changes in the curriculum/training programs in the course of the period under consideration                                                                             | Yes; performance bias/confounding: possible differences between university education | Yes; performance bias: no uniform implementation                                                                                                                   | Yes                                                                                                                                          |
| <b>Definition of result, result measurement, number of measurements</b> | Yes; no pilot testing and valid data; multiple interviews: Start of study, 2 <sup>nd</sup> , end of 4 <sup>th</sup> year of study and residency matching | Yes; no pilot testing and valid data from a database                                                                                                                                                    | Yes; pilot testing                                                                   | Yes; no pilot testing; multiple interviews: before and after the club                                                                                              | Yes; no pilot testing                                                                                                                        |
| <b>Follow-up</b>                                                        | Start to end of study (choice of specialty included)                                                                                                     | 5 years (choice of specialty included)                                                                                                                                                                  | /                                                                                    | Start to end of club (choice of specialty not included)                                                                                                            | /                                                                                                                                            |
| <b>Statistical analysis and limitations</b>                             | Yes; no indication of an exact response rate                                                                                                             | Yes; recall bias: increasing with the number of years between the end of the study and the survey; follow-up possible for only 61%                                                                      | Yes; bias: remuneration of participation (lottery pool), estimation of response rate | Yes                                                                                                                                                                | Yes; no critical consideration of own study                                                                                                  |

|                                             |                                                    |                                                                                                                           |                                                                                                         |                                                                                                        |                                                                                                            |
|---------------------------------------------|----------------------------------------------------|---------------------------------------------------------------------------------------------------------------------------|---------------------------------------------------------------------------------------------------------|--------------------------------------------------------------------------------------------------------|------------------------------------------------------------------------------------------------------------|
| <b>Quality criterion</b>                    | <b>McParland et al. [2003]<sup>212</sup></b>       | <b>Mehmood et al. [2012]<sup>213</sup></b>                                                                                | <b>Mihalynuk et al. [2006]<sup>214</sup></b>                                                            | <b>Montgomery et al. [2015]<sup>215</sup></b>                                                          | <b>Moore et al. [2016]<sup>216</sup></b>                                                                   |
| <b>Research question</b>                    | Yes                                                | Yes                                                                                                                       | Yes                                                                                                     | Yes                                                                                                    | Yes                                                                                                        |
| <b>Preregistration</b>                      | No statement                                       | No statement                                                                                                              | No statement                                                                                            | No statement                                                                                           | No statement                                                                                               |
| <b>Study-population</b>                     | Yes; randomization: none; representativeness: none | Yes; randomization: none; representativeness: no assessment possible; no exact representation of the recruitment strategy | Yes; randomization: none; representativeness: none; no exact representation of the recruitment strategy | Yes; randomization: none; representativeness: none; selection bias: missing demographic data of 10.8 % | Yes; randomization: none; representativeness: no assessment possible                                       |
| <b>Exposition and outcome</b>               | Yes                                                | Yes                                                                                                                       | Yes                                                                                                     | Yes                                                                                                    | Yes                                                                                                        |
| <b>Exposure measure(s), exposure levels</b> | Yes                                                | Yes                                                                                                                       | Yes                                                                                                     | Yes                                                                                                    | Yes; performance bias/confounding: possible differences between university education and training programs |

|                                                                         |                                                                                                                                  |                    |                                                                                                                                                              |                                                         |                                                                                                                                  |
|-------------------------------------------------------------------------|----------------------------------------------------------------------------------------------------------------------------------|--------------------|--------------------------------------------------------------------------------------------------------------------------------------------------------------|---------------------------------------------------------|----------------------------------------------------------------------------------------------------------------------------------|
| <b>Definition of result, result measurement, number of measurements</b> | Yes; no pilot testing, audit results and use of validated questionnaires (ATP-30); multiple interview: before and after exposure | Yes; pilot testing | Yes; no pilot testing                                                                                                                                        | Yes; no pilot testing                                   | Yes; no pilot testing                                                                                                            |
| <b>Follow-up</b>                                                        | Start to end of exposition (choice of specialty not included)                                                                    | /                  | /                                                                                                                                                            | /                                                       | /                                                                                                                                |
| <b>Statistical analysis and limitations</b>                             | Yes; no critical consideration of own study                                                                                      | Yes                | Yes; absolute and relative frequencies only; response according to social desirability: submission of qualitative reflection papers to supervising directors | Yes; bias: remuneration of participation (lottery pool) | Yes; conflict of interest/responsibility according to social desirability: authors involved in training in anesthesia themselves |

| <b>Quality criterion</b>                                                | <b>Morrison and Murray [1996]<sup>217</sup></b>                                                    | <b>Mortlock et al. [2017]<sup>218</sup></b>                                                                                                         | <b>Mulcare et al. [2011]<sup>219</sup></b>                                                                                                                                                                     | <b>Mutha et al. [1997]<sup>220</sup></b>                                                                                                                                                                                 | <b>Nakhoul et al. [2021]<sup>221</sup></b>                                                                                                                              |
|-------------------------------------------------------------------------|----------------------------------------------------------------------------------------------------|-----------------------------------------------------------------------------------------------------------------------------------------------------|----------------------------------------------------------------------------------------------------------------------------------------------------------------------------------------------------------------|--------------------------------------------------------------------------------------------------------------------------------------------------------------------------------------------------------------------------|-------------------------------------------------------------------------------------------------------------------------------------------------------------------------|
| <b>Research question</b>                                                | Yes                                                                                                | Yes                                                                                                                                                 | Yes                                                                                                                                                                                                            | Yes                                                                                                                                                                                                                      | Yes                                                                                                                                                                     |
| <b>Preregistration</b>                                                  | No statement                                                                                       | No statement                                                                                                                                        | No statement                                                                                                                                                                                                   | No statement                                                                                                                                                                                                             | No statement                                                                                                                                                            |
| <b>Study-population</b>                                                 | Yes; randomization: none; representativeness: no assessment possible                               | Yes; randomization: none; representativeness: none; selection bias: none Information on the proportions of included universities and years of study | Yes; randomization: none; representativeness: partly                                                                                                                                                           | Yes; randomization: none; representativeness: partial (gender, ethnicity); selection bias: recruitment based on availability, no information on the distribution of participants in general and in the group discussions | Yes; randomization: none; representativeness: partial (gender, ethnicity); selection bias: different proportions/response rates of included universities                |
| <b>Exposition and outcome</b>                                           | Yes                                                                                                | Yes                                                                                                                                                 | Yes                                                                                                                                                                                                            | Yes                                                                                                                                                                                                                      | Yes                                                                                                                                                                     |
| <b>Exposure measure(s), exposure levels</b>                             | Yes; performance bias: no uniform implementation                                                   | Yes; performance bias/confounding: possible differences between included universities                                                               | Yes; performance bias/confounding: possible differences between included universities                                                                                                                          | Yes; performance bias/confounding: possible differences between included universities                                                                                                                                    | Yes; performance bias/confounding: possible differences between university education and training programs                                                              |
| <b>Definition of result, result measurement, number of measurements</b> | Yes; no pilot testing; multiple interviews: before and after exposure, and 1 year after graduation | Yes; no pilot testing, audit results and use of validated questionnaires (ATP-30); multiple interview: before and after the course                  | Yes; pilot testing; measurement bias: no uniform implementation                                                                                                                                                | Yes; pilot testing; measurement bias: no uniform implementation                                                                                                                                                          | Yes; pilot testing                                                                                                                                                      |
| <b>Follow-up</b>                                                        | 16-26 months (choice of specialty not included)                                                    | Start to end of course (choice of specialty not included)                                                                                           | /                                                                                                                                                                                                              | /                                                                                                                                                                                                                        | /                                                                                                                                                                       |
| <b>Statistical analysis and limitations</b>                             | Yes; no critical consideration of own study                                                        | Yes; bias: use of same questionnaires in pre- and post-survey                                                                                       | Yes; response according to social desirability/propensity for positivity: subjective information on the curriculum, by the respective directors; no consideration of further/other emergency medical exposures | Yes; answer according to social desirability: presence of the study leaders                                                                                                                                              | Yes; bias: remuneration for participation (lottery pool); response according to social desirability: questionnaires handed out by the directors of continuing education |

| <b>Quality criterion</b> | <b>Ndetei et al. [2013]<sup>222</sup></b> | <b>Nelson et al. [2020]<sup>223</sup></b> | <b>Ng et al. [2020]<sup>224</sup></b> | <b>Ng et al. [2021]<sup>225</sup></b> | <b>Ni Chróinín et al. [2013]<sup>226</sup></b> |
|--------------------------|-------------------------------------------|-------------------------------------------|---------------------------------------|---------------------------------------|------------------------------------------------|
| <b>Research question</b> | Yes                                       | Yes                                       | Yes                                   | Yes                                   | Yes                                            |

|                                                                         |                                                                                                                                                 |                                                                                                                                                                                                                                                                                  |                                                                                                                                                   |                                                                                                                                                                                                                                                                                             |                                                                                                                                                                                                               |
|-------------------------------------------------------------------------|-------------------------------------------------------------------------------------------------------------------------------------------------|----------------------------------------------------------------------------------------------------------------------------------------------------------------------------------------------------------------------------------------------------------------------------------|---------------------------------------------------------------------------------------------------------------------------------------------------|---------------------------------------------------------------------------------------------------------------------------------------------------------------------------------------------------------------------------------------------------------------------------------------------|---------------------------------------------------------------------------------------------------------------------------------------------------------------------------------------------------------------|
| <b>Preregistration</b>                                                  | No statement                                                                                                                                    | No statement                                                                                                                                                                                                                                                                     | No statement                                                                                                                                      | No statement                                                                                                                                                                                                                                                                                | No statement                                                                                                                                                                                                  |
| <b>Study-population</b>                                                 | Yes; randomization: none; representativeness: no assessment possible; selection bias: recruitment in a lecture                                  | Yes; randomization: none; representativeness: no assessment possible; selection bias: no socio-demographic information on the sample, voluntary participation (= primary interest)                                                                                               | Yes; randomization: none; representativeness: given (authors' statement)                                                                          | Yes; randomization: none; representativeness: none; selection bias: recruitment of participants from databases (only residents listed there)                                                                                                                                                | Yes; randomization: none; representativeness: partly given for the university under consideration, but not for the research objective described; selection bias: voluntary participation (= primary interest) |
| <b>Exposition and outcome</b>                                           | Yes                                                                                                                                             | Yes                                                                                                                                                                                                                                                                              | Yes                                                                                                                                               | Yes                                                                                                                                                                                                                                                                                         | Yes                                                                                                                                                                                                           |
| <b>Exposure measure(s), exposure levels</b>                             | Yes                                                                                                                                             | Yes; performance bias: possible curricular changes in the period under consideration                                                                                                                                                                                             | Yes; performance bias/confounding: possible differences between education institutions                                                            | Yes; performance bias/confounding: possible differences between university education and training programs                                                                                                                                                                                  | Yes                                                                                                                                                                                                           |
| <b>Definition of result, result measurement, number of measurements</b> | Yes; no pilot testing and use of validated questionnaires (ATP-30, Standardized Assessment of Personality (SAP), etc.)                          | Yes; no pilot testing and use of valid data (database)                                                                                                                                                                                                                           | Yes; no pilot testing                                                                                                                             | Yes; pilot testing                                                                                                                                                                                                                                                                          | Yes; no pilot testing; multiple interviews: before and after the module                                                                                                                                       |
| <b>Follow-up</b>                                                        | /                                                                                                                                               | /                                                                                                                                                                                                                                                                                | /                                                                                                                                                 | /                                                                                                                                                                                                                                                                                           | Start to end of module (choice of specialty not included)                                                                                                                                                     |
| <b>Statistical analysis and limitations</b>                             | Yes; no exact interrogation as an influencing factor on specialist preference, but presentation as such; no critical consideration of own study | Yes; tendency to positive evaluation by preclinical participants, (possibly first encounter with a clinical specialty, associated euphoria/enthusiasm for the first clinical experience, no competition from other clinical specialties); no critical consideration of own study | Yes; acquisition bias; recall bias: survey on "attitude" or subject area preference before the course was subsequently collected after the course | Yes; response according to social desirability/tilt towards positivity: subjective information about the curriculum, by the respective directors; different total number for individual items; recall bias: increasing with the number of years between the end of the study and the survey | Yes; no pairing of pre- and post-data (limited statement on preference change)                                                                                                                                |

| <b>Quality criterion</b>                                                | <b>Noble [2006]<sup>227</sup></b>                                                                                                                                                   | <b>Noble et al. [2007]<sup>228</sup></b>                                                                   | <b>O'Donoghue et al. [2015]<sup>229</sup></b>                                                         | <b>Onyemaechi et al. [2017]<sup>231</sup></b>                                                                                                                                      | <b>Osborn [1993]<sup>232</sup></b>                                                                                   |
|-------------------------------------------------------------------------|-------------------------------------------------------------------------------------------------------------------------------------------------------------------------------------|------------------------------------------------------------------------------------------------------------|-------------------------------------------------------------------------------------------------------|------------------------------------------------------------------------------------------------------------------------------------------------------------------------------------|----------------------------------------------------------------------------------------------------------------------|
| <b>Research question</b>                                                | Yes                                                                                                                                                                                 | Yes                                                                                                        | Yes                                                                                                   | Yes                                                                                                                                                                                | Yes                                                                                                                  |
| <b>Preregistration</b>                                                  | No statement                                                                                                                                                                        | No statement                                                                                               | No statement                                                                                          | No statement                                                                                                                                                                       | No statement                                                                                                         |
| <b>Study-population</b>                                                 | Yes; randomization: none; representativeness: no assessment possible; selection bias: no socio-demographic information on the sample, no representation of the recruitment strategy | Yes; randomization: none; representativeness: no assessment possible                                       | Yes; randomization: none; representativeness: no assessment possible                                  | Yes; randomization: none; representativeness: none; selection bias: recruitment at a retreat, overrepresentation of male participants, significant age differences between genders | Yes; randomization: none; representativeness: no assessment possible; selection bias: different recruitment strategy |
| <b>Exposition and outcome</b>                                           | Low                                                                                                                                                                                 | Low                                                                                                        | Yes                                                                                                   | Yes                                                                                                                                                                                | Yes                                                                                                                  |
| <b>Exposure measure(s), exposure levels</b>                             | Yes; performance bias/confounding: possible differences between university education and training programs                                                                          | Yes; performance bias/confounding: possible differences between university education and training programs | Yes; performance bias/confounding: possible differences between teaching institutions and supervision | Yes                                                                                                                                                                                | Yes                                                                                                                  |
| <b>Definition of result, result measurement, number of measurements</b> | Yes; use of previously used questionnaires (National Physician Survey (NPS))                                                                                                        | Yes; no pilot testing                                                                                      | Yes; pilot testing                                                                                    | Yes; pilot testing                                                                                                                                                                 | Yes; no pilot testing                                                                                                |

|                                             |                                                                                                                                           |                                             |                                                                                                              |     |                                                                                                                                                                                                             |
|---------------------------------------------|-------------------------------------------------------------------------------------------------------------------------------------------|---------------------------------------------|--------------------------------------------------------------------------------------------------------------|-----|-------------------------------------------------------------------------------------------------------------------------------------------------------------------------------------------------------------|
| <b>Follow-up</b>                            | /                                                                                                                                         | /                                           | /                                                                                                            | /   | /                                                                                                                                                                                                           |
| <b>Statistical analysis and limitations</b> | Yes; recall bias: increasing with the number of years between the end of the study and the survey; no critical consideration on own study | Yes; no critical consideration of own study | Yes; little critical consideration of own study; response according to social desirability/approval tendency | Yes | Yes; answering according to social desirability: partly recruitment/survey at residency matching program (influence on selection); no definitions for similar items; no critical consideration of own study |

| <b>Quality criterion</b>                                                | <b>Pearson and Westra [2016]<sup>235</sup></b>                                                                                                                                                                                                                                                                            | <b>Pearson et al. [2002]<sup>236</sup></b>                                                                                                                                                                                                                                        | <b>Peiffer-Smadja et al. [2020]<sup>237</sup></b>                                                                                               | <b>Phillips and Charnley [2016]<sup>238</sup></b>                                                                                | <b>Piccinato et al. [2017]<sup>240</sup></b>                                                                                                                                                       |
|-------------------------------------------------------------------------|---------------------------------------------------------------------------------------------------------------------------------------------------------------------------------------------------------------------------------------------------------------------------------------------------------------------------|-----------------------------------------------------------------------------------------------------------------------------------------------------------------------------------------------------------------------------------------------------------------------------------|-------------------------------------------------------------------------------------------------------------------------------------------------|----------------------------------------------------------------------------------------------------------------------------------|----------------------------------------------------------------------------------------------------------------------------------------------------------------------------------------------------|
| <b>Research question</b>                                                | Yes                                                                                                                                                                                                                                                                                                                       | Yes                                                                                                                                                                                                                                                                               | Yes                                                                                                                                             | Yes                                                                                                                              | Yes                                                                                                                                                                                                |
| <b>Preregistration</b>                                                  | No statement                                                                                                                                                                                                                                                                                                              | No statement                                                                                                                                                                                                                                                                      | No statement                                                                                                                                    | No statement                                                                                                                     | No statement                                                                                                                                                                                       |
| <b>Study-population</b>                                                 | Yes; randomization: none; representativeness: none; selection bias: voluntary participation (= primary interest), no indication of gender ratio, different proportions and response rates of the individual training levels                                                                                               | Yes; randomization: creation of comparable groups through random allocation after categorization; representativeness: no assessment possible                                                                                                                                      | Yes; randomization: none; representativeness: no assessment possible                                                                            | Yes; randomization: none; representativeness: none (authors' statement)                                                          | Yes; randomization: none; representativeness: none; selection bias: 2/3 of participants from general surgery, vascular surgery and visceral surgery                                                |
| <b>Exposition and outcome</b>                                           | Yes                                                                                                                                                                                                                                                                                                                       | Yes                                                                                                                                                                                                                                                                               | Yes                                                                                                                                             | Yes                                                                                                                              | Yes                                                                                                                                                                                                |
| <b>Exposure measure(s), exposure levels</b>                             | Yes; performance bias: possible curricular changes to the course in the period under consideration                                                                                                                                                                                                                        | Yes                                                                                                                                                                                                                                                                               | Yes; performance bias/confounding: possible differences between university education and training programs                                      | Yes; performance bias: no uniform implementation                                                                                 | Yes; performance bias/confounding: possible differences between university education and training programs                                                                                         |
| <b>Definition of result, result measurement, number of measurements</b> | Yes; no pilot testing; measurement bias: no uniform implementation                                                                                                                                                                                                                                                        | Yes; pilot testing; measurement bias: no uniform implementation                                                                                                                                                                                                                   | Yes; pilot testing                                                                                                                              | Yes; no pilot testing; multiple interviews: before and after the clerkship, as well as in the 4th year of study                  | Yes; no pilot testing                                                                                                                                                                              |
| <b>Follow-up</b>                                                        | /                                                                                                                                                                                                                                                                                                                         | /                                                                                                                                                                                                                                                                                 | /                                                                                                                                               | Up to 1 year (choice of specialty not included)                                                                                  | /                                                                                                                                                                                                  |
| <b>Statistical analysis and limitations</b>                             | Yes; tendency to positive evaluation by pre-clinical participants, (possibly first encounter with a clinical specialty, associated euphoria/enthusiasm for the first clinical experience, no competition from other clinical specialties); recall bias: increasing with the number of years between course end and survey | Yes; creation of comparable groups by random assignment, after categorization; dichotomization of subject area preference; recall bias: increasing with the number of years between the end of studies and the survey, as well as influence of the work environment/field of work | Yes; inclination to positive/interest increase: survey 2 years after recognition of the specialty of "infectious diseases and tropical diseases | Yes; dichotomization of the 4 response categories; no pairing of the pre- and post-data (limited statement on preference change) | Yes; answering according to social desirability: personal address and presence of the authors; susceptibility to interpretation for the qualitative data, as there is no definition of the answers |

| <b>Quality criterion</b> | <b>Pointer et al. [2017]<sup>241</sup></b> | <b>Polsky and Werner [2004]<sup>243</sup></b> | <b>Poole et al. [2008]<sup>244</sup></b> | <b>Prud'homme et al. [2020]<sup>245</sup></b> | <b>Pullen et al. [2013]<sup>246</sup></b> |
|--------------------------|--------------------------------------------|-----------------------------------------------|------------------------------------------|-----------------------------------------------|-------------------------------------------|
| <b>Research question</b> | Yes                                        | Yes                                           | Yes                                      | No clear formulation                          | Yes                                       |
| <b>Preregistration</b>   | No statement                               | No statement                                  | No statement                             | No statement                                  | No statement                              |

|                                                                         |                                                                                                                     |                                                                                                                                      |                                                                                             |                                                                                                                                                                                                                                                                            |                                                                                                                                                                   |
|-------------------------------------------------------------------------|---------------------------------------------------------------------------------------------------------------------|--------------------------------------------------------------------------------------------------------------------------------------|---------------------------------------------------------------------------------------------|----------------------------------------------------------------------------------------------------------------------------------------------------------------------------------------------------------------------------------------------------------------------------|-------------------------------------------------------------------------------------------------------------------------------------------------------------------|
| <b>Study-population</b>                                                 | Yes; randomization: none; representativeness: no assessment possible; selection bias: no indication of gender ratio | Yes; randomization: none; representativeness: none; selection bias: significant difference between "responders" and "non-responders" | Yes; randomization: none; representativeness: none; selection bias: different gender ratios | Yes; randomization: none; representativeness: no assessment possible; selection bias: recruitment from application portal                                                                                                                                                  | Yes; randomization: none; representativeness: no assessment possible; selection bias: no indication of gender ratio, voluntary participation (= primary interest) |
| <b>Exposition and outcome</b>                                           | Yes                                                                                                                 | Yes                                                                                                                                  | Yes                                                                                         | Yes                                                                                                                                                                                                                                                                        | Yes                                                                                                                                                               |
| <b>Exposure measure(s), exposure levels</b>                             | Yes; performance bias: no uniform implementation                                                                    | Yes; performance bias/confounding: possible differences between university education and training programs                           | Yes; no pilot testing                                                                       | Yes; performance bias/confounding: possible differences between university education                                                                                                                                                                                       | Yes; performance bias/confounding: possible differences between included universities                                                                             |
| <b>Definition of result, result measurement, number of measurements</b> | Yes; no pilot testing; measurement bias: no uniform implementation                                                  | Yes; no pilot testing                                                                                                                | Yes; no pilot testing; measurement bias: no uniform implementation                          | Yes; no pilot testing; measurement bias: no uniform implementation                                                                                                                                                                                                         | Yes; no pilot testing and study was itself a pilot study; multiple interviews: Beginning and end of study year (measurement bias: no uniform implementation)      |
| <b>Follow-up</b>                                                        | /                                                                                                                   | /                                                                                                                                    | /                                                                                           | /                                                                                                                                                                                                                                                                          | Partial start to end of the academic year (choice of specialty not included)                                                                                      |
| <b>Statistical analysis and limitations</b>                             | Yes; recall bias: increases with the number of years between the end of the study and the survey                    | Yes; answering according to social desirability: questionnaire handed out by the directors of continuing education                   | Yes; no pairing of pre- and post-data (limited significance)                                | Yes; only indication of absolute and relative frequencies; response according to social desirability: survey after application, but before selection result; inclination to positivity/interest increase: survey 1 year after recognition of the specialty of "geriatrics" | Yes; follow-up survey only with regular participation                                                                                                             |

| Quality criterion                           | Rahbar et al. [2010] <sup>248</sup>                                                                                                                  | Ramaswamy et al. [2019] <sup>249</sup>                                                                                                                                                            | Rao et al. [2017] <sup>250</sup>                                                                                                                           | Ravindra et al. [2013] <sup>252</sup>                                                                                         | Ravindra and Fitzgerald [2011] <sup>251</sup>                                                                     |
|---------------------------------------------|------------------------------------------------------------------------------------------------------------------------------------------------------|---------------------------------------------------------------------------------------------------------------------------------------------------------------------------------------------------|------------------------------------------------------------------------------------------------------------------------------------------------------------|-------------------------------------------------------------------------------------------------------------------------------|-------------------------------------------------------------------------------------------------------------------|
| <b>Research question</b>                    | Yes                                                                                                                                                  | Yes                                                                                                                                                                                               | Yes                                                                                                                                                        | Yes                                                                                                                           | Yes                                                                                                               |
| <b>Preregistration</b>                      | No statement                                                                                                                                         | No statement                                                                                                                                                                                      | No statement                                                                                                                                               | No statement                                                                                                                  | No statement                                                                                                      |
| <b>Study-population</b>                     | Yes; randomization: none; representativeness: none; selection bias: different proportions/response rates of the individual included education levels | Yes; randomization: none; representativeness: no assessment possible (significant differences to data in the literature); selection bias: different proportions of the individual training levels | Yes; randomization: none; representativeness: partial; selection bias: different proportions/response rates for the individual study years and ethnicities | Yes; randomization: none; representativeness: partial (authors' statement); selection bias: recruitment in a university event | Yes; randomization: none; representativeness: given (authors' statement) - none for the stated research objective |
| <b>Exposition and outcome</b>               | Yes                                                                                                                                                  | Yes                                                                                                                                                                                               | Yes                                                                                                                                                        | Yes                                                                                                                           | Yes                                                                                                               |
| <b>Exposure measure(s), exposure levels</b> | Yes; performance bias/confounding: possible differences between the included education levels                                                        | Yes; performance bias/confounding: possible differences between university education and training programs                                                                                        | Yes; performance bias/confounding: possible differences between included universities                                                                      | Yes; performance bias: no uniform implementation                                                                              | Yes; performance bias: no uniform implementation                                                                  |

|                                                                         |                                                                                                                                                      |                       |                                                        |                                                                 |                    |
|-------------------------------------------------------------------------|------------------------------------------------------------------------------------------------------------------------------------------------------|-----------------------|--------------------------------------------------------|-----------------------------------------------------------------|--------------------|
| <b>Definition of result, result measurement, number of measurements</b> | Yes; no pilot testing; measurement bias: no uniform implementation                                                                                   | Yes; no pilot testing | Yes; pilot testing                                     | Yes; pilot testing; measurement bias: no uniform implementation | Yes; pilot testing |
| <b>Follow-up</b>                                                        | /                                                                                                                                                    | /                     | /                                                      | /                                                               | /                  |
| <b>Statistical analysis and limitations</b>                             | Yes; comparison of a ("large") heterogeneous group with a ("small") homogeneous group of another educational level; no indication of a response rate | Yes                   | Yes; no precise indication of a response rate possible | Yes                                                             | Yes                |

| <b>Quality criterion</b>                                                | <b>Ray et al. [2018]<sup>253</sup></b>                                                                                               | <b>Redman et al. [1994]<sup>254</sup></b>                                                                                                                                                                                     | <b>Rehman et al. [2011]<sup>255</sup></b>                                                             | <b>Retrouvey et al. [2018]<sup>256</sup></b>                                                                                                                                                                                                                                                                                                       | <b>Roberts and Khursandi [2002]<sup>257</sup></b>                                                                                                                                                                                                                    |
|-------------------------------------------------------------------------|--------------------------------------------------------------------------------------------------------------------------------------|-------------------------------------------------------------------------------------------------------------------------------------------------------------------------------------------------------------------------------|-------------------------------------------------------------------------------------------------------|----------------------------------------------------------------------------------------------------------------------------------------------------------------------------------------------------------------------------------------------------------------------------------------------------------------------------------------------------|----------------------------------------------------------------------------------------------------------------------------------------------------------------------------------------------------------------------------------------------------------------------|
| <b>Research question</b>                                                | Yes                                                                                                                                  | Yes                                                                                                                                                                                                                           | Yes                                                                                                   | No clear formulation                                                                                                                                                                                                                                                                                                                               | Yes                                                                                                                                                                                                                                                                  |
| <b>Preregistration</b>                                                  | No statement                                                                                                                         | No statement                                                                                                                                                                                                                  | No statement                                                                                          | No statement                                                                                                                                                                                                                                                                                                                                       | No statement                                                                                                                                                                                                                                                         |
| <b>Study-population</b>                                                 | Yes; randomization: none; representativeness: none (authors' statement); selection bias: not all geographical regions represented    | Yes; randomization: none; representativeness: none; selection bias: recruitment in a university event, significant differences between the "responders" and "non-responders", different response rates of the included groups | Yes; randomization: none; representativeness: partial (gender); selection bias: recruitment on campus | Yes; randomization: none; Representativeness: no assessment possible; Selection bias: no socio-demographic information on the sample                                                                                                                                                                                                               | Yes; randomization: only for male members; representativeness: no assessment possible; selection bias: recruitment from the Australian Society of Anesthetists, different proportions and response rates for gender and included regions, one region not represented |
| <b>Exposition and outcome</b>                                           | Yes                                                                                                                                  | Yes                                                                                                                                                                                                                           | Yes                                                                                                   | Yes                                                                                                                                                                                                                                                                                                                                                | Yes                                                                                                                                                                                                                                                                  |
| <b>Exposure measure(s), exposure levels</b>                             | Yes; performance bias/confounding: possible differences between university education and training programs                           | Yes                                                                                                                                                                                                                           | Yes; performance bias/confounding: possible differences between included universities                 | Yes; performance bias: no uniform implementation                                                                                                                                                                                                                                                                                                   | Yes; performance bias/confounding: possible differences between university education and training programs                                                                                                                                                           |
| <b>Definition of result, result measurement, number of measurements</b> | Yes; pilot testing                                                                                                                   | Yes; no pilot testing                                                                                                                                                                                                         | Yes; pilot testing                                                                                    | Yes; no pilot testing; multiple interviews: before and after the course; measurement bias: no uniform implementation                                                                                                                                                                                                                               | Yes; no pilot testing                                                                                                                                                                                                                                                |
| <b>Follow-up</b>                                                        | /                                                                                                                                    | /                                                                                                                                                                                                                             | /                                                                                                     | Start to end of course (choice of specialist not included)                                                                                                                                                                                                                                                                                         | /                                                                                                                                                                                                                                                                    |
| <b>Statistical analysis and limitations</b>                             | Yes; response according to social desirability: survey after application, but before final selection of further education applicants | Yes                                                                                                                                                                                                                           | Yes                                                                                                   | Yes; tendency to be positively evaluated by pre-clinical participants, (possibly first encounter with a clinical specialty, associated euphoria/enthusiasm for the first clinical experience, no competition from other clinical specialties); answering according to social desirability: videos were developed and shot at inclusive university; | Yes; recall bias: increasing with the number of years between the end of the study and the survey; randomization only for the male participants; low critical consideration of own study                                                                             |

|  |  |  |  |                                                               |  |
|--|--|--|--|---------------------------------------------------------------|--|
|  |  |  |  | participation "compulsion":<br>exam questions from the videos |  |
|--|--|--|--|---------------------------------------------------------------|--|

| Quality criterion                                                       | Rojnic Kuzman et al. [2013] <sup>258</sup>                                                                                                       | Roy et al. [2021] <sup>259</sup>                                                                                                                                                                                                                                                                                                  | Rubeck et al. [1995] <sup>260</sup>                                                                                                       | Ryan et al. [2018] <sup>262</sup>                                                                                                                                                               | Saalwachter et al. [2005] <sup>263</sup>                                                                                                                                                       |
|-------------------------------------------------------------------------|--------------------------------------------------------------------------------------------------------------------------------------------------|-----------------------------------------------------------------------------------------------------------------------------------------------------------------------------------------------------------------------------------------------------------------------------------------------------------------------------------|-------------------------------------------------------------------------------------------------------------------------------------------|-------------------------------------------------------------------------------------------------------------------------------------------------------------------------------------------------|------------------------------------------------------------------------------------------------------------------------------------------------------------------------------------------------|
| <b>Research question</b>                                                | Yes                                                                                                                                              | Yes                                                                                                                                                                                                                                                                                                                               | Yes                                                                                                                                       | Yes                                                                                                                                                                                             | Yes                                                                                                                                                                                            |
| <b>Preregistration</b>                                                  | No statement                                                                                                                                     | No statement                                                                                                                                                                                                                                                                                                                      | No statement                                                                                                                              | No statement                                                                                                                                                                                    | No statement                                                                                                                                                                                   |
| <b>Study-population</b>                                                 | Yes; randomization: none; representativeness: given (authors' statement); selection bias: recruitment of contact addresses in a university event | Yes; randomization: none; representativeness: none; selection bias: voluntary participation (= primary interest), different proportions of years of study                                                                                                                                                                         | Yes; randomization: none; representativeness: none                                                                                        | Yes; randomization: none; representativeness: partly (gender)                                                                                                                                   | Yes; randomization: none; representativeness: no assessment possible; selection bias: different proportions and response rates of the individual groups                                        |
| <b>Exposition and outcome</b>                                           | Yes                                                                                                                                              | Yes                                                                                                                                                                                                                                                                                                                               | Yes                                                                                                                                       | Yes                                                                                                                                                                                             | Yes                                                                                                                                                                                            |
| <b>Exposure measure(s), exposure levels</b>                             | Yes                                                                                                                                              | Yes                                                                                                                                                                                                                                                                                                                               | Yes; performance bias: possible curricular changes in the period under consideration                                                      | Yes; performance bias/confounding: possible differences between university education and training programs                                                                                      | Yes; performance bias/confounding: possible differences between university education and training programs                                                                                     |
| <b>Definition of result, result measurement, number of measurements</b> | Yes; pilot testing and use of validated questionnaires (Attitude to Psychiatry Scale (ATP-18), International English Mini-Markers)               | Yes; no pilot testing; multiple interviews: before and after the course                                                                                                                                                                                                                                                           | Yes; no pilot testing                                                                                                                     | Yes; no pilot testing                                                                                                                                                                           | Yes; pilot testing                                                                                                                                                                             |
| <b>Follow-up</b>                                                        | /                                                                                                                                                | Start to end of course (choice of specialty not included)                                                                                                                                                                                                                                                                         | /                                                                                                                                         | /                                                                                                                                                                                               | /                                                                                                                                                                                              |
| <b>Statistical analysis and limitations</b>                             | Yes; questionnaire in English, not in mother tongue                                                                                              | Yes; tendency to positive evaluation by preclinical participants, (possibly first encounter with a clinical specialty, associated euphoria/enthusiasm for the first clinical experience, no competition from other clinical specialties); subjective statements on knowledge gain and skills; no critical reflection on own study | Yes; recall bias: increasing with the number of years between the end of the study and the survey; no critical consideration of own study | Yes; recall bias: increasing with the number of years between the end of studies and the survey; participants included in the list of all participants, but not listed in the individual groups | Yes; no indication of a response rate possible; recall bias: increasing with the number of years between the end of the study and the survey; bias: study time: implementation of the 80h-rule |

| Quality criterion             | Saberski et al. [2015] <sup>264</sup>                                                                                                | Sanfey et al. [2006] <sup>267</sup>                                                                                                                      | Schnuth et al. [2003] <sup>268</sup>                                                                                                                                                    | Schwartz et al. [1995] <sup>269</sup>                                                                                                              | Schwartz et al. [2011] <sup>270</sup>                                                        |
|-------------------------------|--------------------------------------------------------------------------------------------------------------------------------------|----------------------------------------------------------------------------------------------------------------------------------------------------------|-----------------------------------------------------------------------------------------------------------------------------------------------------------------------------------------|----------------------------------------------------------------------------------------------------------------------------------------------------|----------------------------------------------------------------------------------------------|
| <b>Research question</b>      | Yes                                                                                                                                  | Yes                                                                                                                                                      | Yes                                                                                                                                                                                     | Yes                                                                                                                                                | Yes                                                                                          |
| <b>Preregistration</b>        | No statement                                                                                                                         | No statement                                                                                                                                             | No statement                                                                                                                                                                            | No statement                                                                                                                                       | No statement                                                                                 |
| <b>Study-population</b>       | Yes; randomization: none; representativeness: no assessment possible; selection bias: no socio-demographic information on the sample | Yes; randomization: none; representativeness: no assessment possible; selection bias: different proportions and response rates of the individual studies | Yes; randomization: none; representativeness: given for the included university, but not with regard to the research objective; selection bias: different proportions of years of study | Yes; randomization: yes; representativeness: given (authors' statement); selection bias: only inclusion of universities with at least 150 students | Yes; randomization: none; representativeness: partial (year considered) (authors' statement) |
| <b>Exposition and outcome</b> | Yes                                                                                                                                  | Yes                                                                                                                                                      | Yes                                                                                                                                                                                     | Yes                                                                                                                                                | Yes                                                                                          |

|                                                                         |                                                                                                                                                                                                                                                                                                                                                                                                               |                                                                                                                                                   |                                           |                                                                                                         |                                                                                                            |
|-------------------------------------------------------------------------|---------------------------------------------------------------------------------------------------------------------------------------------------------------------------------------------------------------------------------------------------------------------------------------------------------------------------------------------------------------------------------------------------------------|---------------------------------------------------------------------------------------------------------------------------------------------------|-------------------------------------------|---------------------------------------------------------------------------------------------------------|------------------------------------------------------------------------------------------------------------|
| <b>Exposure measure(s), exposure levels</b>                             | Yes; performance bias: possibly no uniform implementation over the study period                                                                                                                                                                                                                                                                                                                               | Yes; performance bias/confounding: possible differences between included universities                                                             | Yes                                       | Yes                                                                                                     | Yes; performance bias/confounding: possible differences between university education and training programs |
| <b>Definition of result, result measurement, number of measurements</b> | Yes; no pilot testing; multiple interviews: before and after the course                                                                                                                                                                                                                                                                                                                                       | Yes; pilot testing                                                                                                                                | Yes; pilot testing                        | Yes; pilot testing                                                                                      | Yes; use of already collected data (piloted questionnaire)                                                 |
| <b>Follow-up</b>                                                        | Start to end of course (choice of specialty not included)                                                                                                                                                                                                                                                                                                                                                     | /                                                                                                                                                 | /                                         | /                                                                                                       | /                                                                                                          |
| <b>Statistical analysis and limitations</b>                             | Yes; only absolute and relative frequencies; subjective assessment of the increase in knowledge and understanding; tendency to positive assessment by preclinical participants, (possibly first encounter with a clinical specialty, associated with this, euphoria/enthusiasm for the first clinical experience, no competition from other clinical specialties); no critical consideration of the own study | Yes; university of the pilot study also included for the study; no indication of a response rate possible; no critical consideration of own study | Yes; no naming of the included university | Yes; deviations of figures in the text from those in the tables; no critical consideration of own study | Yes; dichotomization of the 5-Likert scale; bias: remuneration of participation in an included study       |

| <b>Quality criterion</b>                                                | <b>Scott et al. [2007a]<sup>271</sup></b>                                                               | <b>Sedaghat et al. [2012]<sup>273</sup></b>                                                                                                                                                            | <b>Seo et al. [2017]<sup>274</sup></b>                                                                                                                                                                    | <b>Seow et al. [2018]<sup>275</sup></b>                                                                                                                          | <b>Shaikh et al. [2015]<sup>276</sup></b>                                                                                            |
|-------------------------------------------------------------------------|---------------------------------------------------------------------------------------------------------|--------------------------------------------------------------------------------------------------------------------------------------------------------------------------------------------------------|-----------------------------------------------------------------------------------------------------------------------------------------------------------------------------------------------------------|------------------------------------------------------------------------------------------------------------------------------------------------------------------|--------------------------------------------------------------------------------------------------------------------------------------|
| <b>Research question</b>                                                | Yes                                                                                                     | Yes                                                                                                                                                                                                    | Yes                                                                                                                                                                                                       | Yes                                                                                                                                                              | Yes                                                                                                                                  |
| <b>Preregistration</b>                                                  | No statement                                                                                            | No statement                                                                                                                                                                                           | No statement                                                                                                                                                                                              | No statement                                                                                                                                                     | No statement                                                                                                                         |
| <b>Study-population</b>                                                 | Yes; randomization: none; representativeness: none; selection bias: exclusion of international students | Yes; randomization: none; representativeness: none; selection bias: voluntary participation (= primary interest), different proportions and response rates of the individual study years, cohorts, etc | Yes; randomization: none; representativeness: none; selection bias: voluntary participation (= primary interest), no socio-demographic information on the sample, different proportions of years of study | Yes; randomization: none; representativeness: no assessment possible; selection bias: different proportions and response rates of the study years                | Yes; randomization: none; representativeness: no assessment possible; selection bias: no socio-demographic information on the sample |
| <b>Exposition and outcome</b>                                           | Yes                                                                                                     | Yes                                                                                                                                                                                                    | Yes                                                                                                                                                                                                       | Yes                                                                                                                                                              | Yes                                                                                                                                  |
| <b>Exposure measure(s), exposure levels</b>                             | Yes; performance bias: no uniform implementation                                                        | Yes; performance bias: no uniform implementation, possible changes in the price in the period under consideration                                                                                      | Yes; performance bias: different implementation for study years 1 + 2 and 3 + 4                                                                                                                           | Yes; performance bias/confounding: possible differences between included universities                                                                            | Yes                                                                                                                                  |
| <b>Definition of result, result measurement, number of measurements</b> | Yes; pilot testing; multiple survey: 1 <sup>st</sup> year of study, 4 <sup>th</sup> year of study       | Yes; no pilot testing                                                                                                                                                                                  | Yes; no pilot testing and OSCE assessment; multiple interviews: before and after the course                                                                                                               | Yes; use of validated questionnaires (ATP-18, Opening Minds Stigma Scale for Healthcare Providers (OMS-HC), Mini-International Personality Item Pool (mini-IPIP) | Yes; no pilot testing; multiple interviews: before and after the curriculum                                                          |

|                                             |                                                                                                   |                                                                                                                                                                                                                                           |                                                                                                                                                                                                                                                   |                                                                                          |                                                                                                                                                                      |
|---------------------------------------------|---------------------------------------------------------------------------------------------------|-------------------------------------------------------------------------------------------------------------------------------------------------------------------------------------------------------------------------------------------|---------------------------------------------------------------------------------------------------------------------------------------------------------------------------------------------------------------------------------------------------|------------------------------------------------------------------------------------------|----------------------------------------------------------------------------------------------------------------------------------------------------------------------|
| <b>Follow-up</b>                            | 3 years (choice of specialty not included)                                                        | /                                                                                                                                                                                                                                         | Start to end of course (choice of specialty not included)                                                                                                                                                                                         | /                                                                                        | Start to end of curriculum (choice of specialty not included)                                                                                                        |
| <b>Statistical analysis and limitations</b> | Yes; bias: in 2 <sup>nd</sup> survey submission of the top 3 subjects mentioned in the 1st survey | Yes; tendency to positive evaluation by pre-clinical participants, (possibly first encounter with a clinical specialty, associated euphoria/enthusiasm for the first clinical experience, no competition from other clinical specialties) | Yes; better performance in the pre-test due to more clinical experience, thus small increase in the post-test; recall bias: subject preference before the course was only asked in the post-questionnaire; no critical consideration of own study | Yes; no information on response rate possible; bias: dichotomization of the 5 categories | Yes; identical pre- and post-questionnaire; subjective assessment of knowledge gain; bias: no pairing of pre- and post-data (limited statement on preference change) |

| <b>Quality criterion</b>                                                | <b>Shelton et al. [2019]<sup>277</sup></b>                                                                                                                                                                                                | <b>Shen et al. [2014]<sup>278</sup></b>                                                                                                                                  | <b>Shepherd et al. [2003]<sup>279</sup></b>                                                                                                                                                                            | <b>Shipper et al. [2017]<sup>280</sup></b>                                                                       | <b>Shrestha et al. [2016]<sup>282</sup></b>                                                            |
|-------------------------------------------------------------------------|-------------------------------------------------------------------------------------------------------------------------------------------------------------------------------------------------------------------------------------------|--------------------------------------------------------------------------------------------------------------------------------------------------------------------------|------------------------------------------------------------------------------------------------------------------------------------------------------------------------------------------------------------------------|------------------------------------------------------------------------------------------------------------------|--------------------------------------------------------------------------------------------------------|
| <b>Research question</b>                                                | Yes                                                                                                                                                                                                                                       | Yes                                                                                                                                                                      | Yes                                                                                                                                                                                                                    | Yes                                                                                                              | Yes                                                                                                    |
| <b>Preregistration</b>                                                  | No statement                                                                                                                                                                                                                              | No statement                                                                                                                                                             | No statement                                                                                                                                                                                                           | No statement                                                                                                     | No statement                                                                                           |
| <b>Study-population</b>                                                 | Yes; randomization: none; representativeness: none; selection bias: voluntary participation (= primary interest)                                                                                                                          | Yes; randomization: none; representativeness: limited (authors' statement)                                                                                               | Yes; randomization: none; representativeness: no assessment possible; selection bias: voluntary participation (= primary interest), no socio-demographic information on the sample                                     | Yes; randomization: none; representativeness: none; selection bias: voluntary participation (= primary interest) | Yes; randomization: none; representativeness: none; no precise description of the recruitment strategy |
| <b>Exposition and outcome</b>                                           | Yes                                                                                                                                                                                                                                       | Yes                                                                                                                                                                      | Yes                                                                                                                                                                                                                    | Yes                                                                                                              | Yes                                                                                                    |
| <b>Exposure measure(s), exposure levels</b>                             | Yes                                                                                                                                                                                                                                       | Yes                                                                                                                                                                      | Yes; performance bias: no uniform implementation, curricular changes to the elective in the period under consideration                                                                                                 | Yes                                                                                                              | Yes                                                                                                    |
| <b>Definition of result, result measurement, number of measurements</b> | Yes; no pilot testing and use of valid data (Association of American Medical Colleges' Medical School Graduation Questionnaire); multiple interview: before and after the course                                                          | Yes; pilot testing of validated questionnaires translated into Chinese (ATP-30, Attitudes Towards Mental Illness (AMI)); multiple interviews: before and after clerkship | Yes; no pilot testing                                                                                                                                                                                                  | Yes; pilot testing; multiple interviews: before and after the course                                             | Yes; no pilot testing; measurement bias: no consideration of non-clinical specialties                  |
| <b>Follow-up</b>                                                        | Start to end of course (choice of specialty not included)                                                                                                                                                                                 | Start to end of clerkship (choice of specialty not included)                                                                                                             | up to 24 years after elective graduation (choice of specialist included)                                                                                                                                               | Start to end of course (choice of specialty not included)                                                        | /                                                                                                      |
| <b>Statistical analysis and limitations</b>                             | Yes; tendency to positive evaluation by pre-clinical participants, (possibly first encounter with a clinical specialty, associated euphoria/enthusiasm for the first clinical experience, no competition from other clinical specialties) | Yes; little critical consideration of own study                                                                                                                          | Yes; recall bias: increasing with the number of years between the end of studies and the survey; bias: significantly increased percentage of radiologists compared to graduates Data from Chicago Medical School (CMS) | Yes; subjective assessment of the proficiency of specific skills                                                 | Yes                                                                                                    |

| Quality criterion                                                       | Siassakos et al. [2009] <sup>283</sup>                                                                                                                                                                       | Simões et al. [2017] <sup>284</sup>                                                                                                       | Sinclair et al. [2006] <sup>285</sup>                                                                                                                                                   | Skokauskas et al. [2012] <sup>287</sup>            | Skorus et al. [2020] <sup>288</sup>                                                                                                                                                              |
|-------------------------------------------------------------------------|--------------------------------------------------------------------------------------------------------------------------------------------------------------------------------------------------------------|-------------------------------------------------------------------------------------------------------------------------------------------|-----------------------------------------------------------------------------------------------------------------------------------------------------------------------------------------|----------------------------------------------------|--------------------------------------------------------------------------------------------------------------------------------------------------------------------------------------------------|
| <b>Research question</b>                                                | Yes                                                                                                                                                                                                          | Yes                                                                                                                                       | Yes                                                                                                                                                                                     | Yes                                                | Yes                                                                                                                                                                                              |
| <b>Preregistration</b>                                                  | No statement                                                                                                                                                                                                 | No statement                                                                                                                              | No statement                                                                                                                                                                            | No statement                                       | No statement                                                                                                                                                                                     |
| <b>Study-population</b>                                                 | Low; randomization: none; representativeness: none; selection bias: no socio-demographic information on the sample, voluntary participation (= primary interest), no information on the recruitment strategy | Yes; randomization: none; representativeness: none; selection bias: voluntary participation (= primary interest)                          | Yes; randomization: none; representativeness: no assessment possible                                                                                                                    | Yes; randomization: none; representativeness: none | Yes; randomization: none; representativeness: none (authors' statement); selection bias: different proportions of universities and years of study no precise information on recruitment strategy |
| <b>Exposition and outcome</b>                                           | Yes                                                                                                                                                                                                          | Yes                                                                                                                                       | Yes                                                                                                                                                                                     | Yes                                                | Yes                                                                                                                                                                                              |
| <b>Exposure measure(s), exposure levels</b>                             | Yes                                                                                                                                                                                                          | Yes                                                                                                                                       | Yes                                                                                                                                                                                     | Yes                                                | Yes; performance bias/confounding: possible differences between included universities                                                                                                            |
| <b>Definition of result, result measurement, number of measurements</b> | Yes; no pilot testing; multiple interviews: before and after exposure                                                                                                                                        | Yes; no pilot testing; measurement bias: no uniform implementation (survey up to 20 years after the camp)                                 | Yes; no pilot testing; multiple interviews: 1 <sup>st</sup> , 2 <sup>nd</sup> , 3 <sup>rd</sup> , 4 <sup>th</sup> , 5 <sup>th</sup> academic year and 1 <sup>st</sup> postgraduate year | Yes; pilot testing                                 | Yes; no pilot testing                                                                                                                                                                            |
| <b>Follow-up</b>                                                        | Start to end of exposition (choice of specialist not included)                                                                                                                                               | /                                                                                                                                         | Start to end of curriculum (choice of specialty not included)                                                                                                                           | /                                                  | /                                                                                                                                                                                                |
| <b>Statistical analysis and limitations</b>                             | Yes; no indication of the response rate                                                                                                                                                                      | Yes; recall bias: increasing with the number of years between the end of the study and the survey; no critical consideration of own study | Yes; total number changed for the individual years; low critical consideration of own study                                                                                             | Yes; differing numerical data in text and tables   | Yes; no indication of the response rate                                                                                                                                                          |

| Quality criterion                           | Sobral [2006] <sup>290</sup>                        | Solomon and DiPette [1994] <sup>291</sup>                                                                                            | Spiers et al. [2019] <sup>294</sup>                                                                                                                                                                                                                   | Sripa et al. [2020] <sup>295</sup>                                                                 | Stearns et al. [1993] <sup>297</sup>                                                         |
|---------------------------------------------|-----------------------------------------------------|--------------------------------------------------------------------------------------------------------------------------------------|-------------------------------------------------------------------------------------------------------------------------------------------------------------------------------------------------------------------------------------------------------|----------------------------------------------------------------------------------------------------|----------------------------------------------------------------------------------------------|
| <b>Research question</b>                    | Yes                                                 | Yes                                                                                                                                  | Yes                                                                                                                                                                                                                                                   | Yes                                                                                                | No clear formulation                                                                         |
| <b>Preregistration</b>                      | No statement                                        | No statement                                                                                                                         | No statement                                                                                                                                                                                                                                          | No statement                                                                                       | No statement                                                                                 |
| <b>Study-population</b>                     | Yes; randomization: none; representativeness: none; | Yes; randomization: none; representativeness: no assessment possible; selection bias: no socio-demographic information on the sample | Yes; randomization: none; representativeness: none; selection bias: Selection bias: voluntary participation (= primary interest), paid participation, hardly any socio-demographic information on the sample, different proportions of years of study | Yes; randomization: none; representativeness: no assessment possible                               | Low; randomization: none; representativeness: no assessment possible; low sample description |
| <b>Exposition and outcome</b>               | Yes                                                 | Yes                                                                                                                                  | Yes                                                                                                                                                                                                                                                   | Yes                                                                                                | Yes                                                                                          |
| <b>Exposure measure(s), exposure levels</b> | Yes                                                 | Yes                                                                                                                                  | Yes                                                                                                                                                                                                                                                   | Yes; performance bias/confounding: possible differences between included universities and programs | Yes                                                                                          |

|                                                                         |                                                                                                                                      |                                             |                                                                                                          |                                                                                                                                                                                                        |                                                                                                   |
|-------------------------------------------------------------------------|--------------------------------------------------------------------------------------------------------------------------------------|---------------------------------------------|----------------------------------------------------------------------------------------------------------|--------------------------------------------------------------------------------------------------------------------------------------------------------------------------------------------------------|---------------------------------------------------------------------------------------------------|
| <b>Definition of result, result measurement, number of measurements</b> | Yes; no pilot testing<br>Multiple surveys: begin of study, end of 1 <sup>st</sup> year, end of 3 <sup>rd</sup> year and end of study | Yes; no pilot testing                       | Yes; no pilot testing<br>Multiple surveys: before and after the course                                   | Yes; pilot testing                                                                                                                                                                                     | Yes; no pilot testing                                                                             |
| <b>Follow-up</b>                                                        | Start to end of study (5 years - choice of specialty included)                                                                       | /                                           | Start to end of course (choice of specialty not included)                                                | /                                                                                                                                                                                                      | /                                                                                                 |
| <b>Statistical analysis and limitations</b>                             | Yes;                                                                                                                                 | Yes; no critical consideration of own study | Yes; Subjective assessment of the ability of specific techniques; no critical consideration of own study | Yes; Yes; answer according to social desirability/positivity: support of the study program by one of the included universities, subjective information on the curricular requirements by the faculties | Yes; Yes; no information on which year(s) were considered; no critical consideration of own study |

| Quality criterion                                                       | Stratton et al. [2005] <sup>298</sup>                                                                                                                                  | Strelzow et al. [2017] <sup>299</sup>                                                                                              | Süß et al. [2020] <sup>300</sup>                                                                                                                                                | Sutton et al. [2014] <sup>301</sup>                                                                                                                                                                                        | Talbot and Ward [2000] <sup>302</sup>                                                                                              |
|-------------------------------------------------------------------------|------------------------------------------------------------------------------------------------------------------------------------------------------------------------|------------------------------------------------------------------------------------------------------------------------------------|---------------------------------------------------------------------------------------------------------------------------------------------------------------------------------|----------------------------------------------------------------------------------------------------------------------------------------------------------------------------------------------------------------------------|------------------------------------------------------------------------------------------------------------------------------------|
| <b>Research question</b>                                                | Yes                                                                                                                                                                    | Yes                                                                                                                                | Yes                                                                                                                                                                             | Yes                                                                                                                                                                                                                        | Yes                                                                                                                                |
| <b>Preregistration</b>                                                  | No statement                                                                                                                                                           | No statement                                                                                                                       | No statement                                                                                                                                                                    | No statement                                                                                                                                                                                                               | No statement                                                                                                                       |
| <b>Study-population</b>                                                 | Yes; randomization: none; representativeness: none; selection bias: no socio-demographic information on the sample, no precise description of the recruitment strategy | Yes; randomization: none; representativeness: no assessment possible; selection bias: no indication of gender ratio per study year | Yes; randomization: none; representativeness: none; selection bias: recruitment based on the presence of a contact person, gender ratio does not correspond to the actual ratio | Yes; randomization: none; representativeness: partial; selection bias: the questionnaire was sent out by the Royal College of Surgeons of England, with a disproportionately high number of students interested in surgery | Yes; randomization: none; representativeness: no assessment possible; selection bias: voluntary participation (= primary interest) |
| <b>Exposition and outcome</b>                                           | Yes                                                                                                                                                                    | Yes                                                                                                                                | Yes                                                                                                                                                                             | Yes                                                                                                                                                                                                                        | Yes                                                                                                                                |
| <b>Exposure measure(s), exposure levels</b>                             | Yes; performance bias/confounding: possible differences between included universities                                                                                  | Yes; performance bias/confounding: possible differences between the individual training levels                                     | Yes; performance bias/confounding: possible differences between included institutions                                                                                           | Yes; performance bias/confounding: possible differences between included universities                                                                                                                                      | Yes; performance bias: no uniform implementation                                                                                   |
| <b>Definition of result, result measurement, number of measurements</b> | Yes; pilot testing                                                                                                                                                     | Yes; no pilot testing                                                                                                              | Yes; no pilot testing                                                                                                                                                           | Yes; pilot testing                                                                                                                                                                                                         | Yes; pilot testing; multiple interviews: before and after the internship                                                           |
| <b>Follow-up</b>                                                        | /                                                                                                                                                                      | /                                                                                                                                  | /                                                                                                                                                                               | /                                                                                                                                                                                                                          | Start to end of placement (choice of specialty not included)                                                                       |
| <b>Statistical analysis and limitations</b>                             | Yes; different total numbers for the individual items; no statement about individual items possible, as always examined together                                       | Yes; bias: remuneration of participation (lottery pool)                                                                            | Yes; significant differences, with regard to socio-demographic factors, reduce comparability                                                                                    | Yes; only indication of absolute and relative frequencies; no indication of a response rate                                                                                                                                | Yes; no indication of a response rate; no critical consideration of own study                                                      |

| Quality criterion        | Teclessou et al. [2021] <sup>303</sup> | Tesche et al. [2010] <sup>304</sup> | Thivierge-Southidara et al. [2022] <sup>306</sup> | Torrible et al. [2006] <sup>308</sup> | Turner et al. [2006] <sup>309</sup> |
|--------------------------|----------------------------------------|-------------------------------------|---------------------------------------------------|---------------------------------------|-------------------------------------|
| <b>Research question</b> | Yes                                    | Yes                                 | Yes                                               | Yes                                   | Yes                                 |
| <b>Preregistration</b>   | No statement                           | No statement                        | No statement                                      | No statement                          | No statement                        |

|                                                                         |                                                                                                |                                                                                                                                                                                                                                                                                                                                                                                            |                                                                                                                                                                             |                                                                                                                                                                                                                                                                       |                                                                                                                                                                                                      |
|-------------------------------------------------------------------------|------------------------------------------------------------------------------------------------|--------------------------------------------------------------------------------------------------------------------------------------------------------------------------------------------------------------------------------------------------------------------------------------------------------------------------------------------------------------------------------------------|-----------------------------------------------------------------------------------------------------------------------------------------------------------------------------|-----------------------------------------------------------------------------------------------------------------------------------------------------------------------------------------------------------------------------------------------------------------------|------------------------------------------------------------------------------------------------------------------------------------------------------------------------------------------------------|
| <b>Study-population</b>                                                 | Yes; randomization: none; representativeness: no assessment possible                           | Yes; randomization: none; representativeness: none; selection bias: voluntary participation (= primary interest), all participants members of a surgical interest group                                                                                                                                                                                                                    | Yes; randomization: none; representativeness: no assessment possible; selection bias: voluntary participation (= primary interest), different proportions of years of study | Yes; randomization: none; representativeness: none; selection bias: recruitment at a large group academic event, recruitment of residents only if email address available, no inclusion of French-speaking regions, all participating geriatric residents were female | Yes; randomization: none; representativeness: partial; selection bias: indication of general ratios, no indication of ratios in individual cohorts/years, inclusion only of those licensed in the UK |
| <b>Exposition and outcome</b>                                           | Yes                                                                                            | Yes                                                                                                                                                                                                                                                                                                                                                                                        | Yes                                                                                                                                                                         | Yes                                                                                                                                                                                                                                                                   | Yes                                                                                                                                                                                                  |
| <b>Exposure measure(s), exposure levels</b>                             | Yes; performance bias/confounding: possible differences between the individual training levels | Yes                                                                                                                                                                                                                                                                                                                                                                                        | Yes; performance bias: no uniform implementation                                                                                                                            | Yes; performance bias/confounding: possible differences between the individual training levels                                                                                                                                                                        | Yes; performance bias/confounding: possible differences between university education and training programs, possible curricular changes in the period under consideration                            |
| <b>Definition of result, result measurement, number of measurements</b> | Yes; no pilot testing                                                                          | Yes; no pilot testing; multiple interviews: before and after the course                                                                                                                                                                                                                                                                                                                    | Yes; no pilot testing; multiple interviews: before and after the observer-ship                                                                                              | Yes; pilot testing; measurement bias: no uniform implementation                                                                                                                                                                                                       | Yes; no pilot testing; multiple interviews: 1 year, 3 years and further time intervals after the end of the study                                                                                    |
| <b>Follow-up</b>                                                        | /                                                                                              | Start to end of course (choice of specialty not included)                                                                                                                                                                                                                                                                                                                                  | Start to end of observer-ship (choice of specialty not included)                                                                                                            | /                                                                                                                                                                                                                                                                     | Up to 10 (choice of specialty included)                                                                                                                                                              |
| <b>Statistical analysis and limitations</b>                             | Yes; summarized statement for both groups, despite different levels of education               | Yes; tendency to positive evaluation by preclinical participants, (possibly first encounter with a clinical specialty, associated euphoria/enthusiasm for the first clinical experience, no competition from other clinical specialties); summarized statement for both specialties, despite actual effect in only one specialty; no consideration of the influence of mentors/supervisors | Yes                                                                                                                                                                         | Yes; recall bias: increases with the number of years between the end of the study and the survey                                                                                                                                                                      | Yes; only 2 cohorts considered to investigate the influencing factors                                                                                                                                |

|                          |                                                                                                                                                           |                                                                                                                                             |                                                                                                                                                                             |                                                    |                                                                                                                                |
|--------------------------|-----------------------------------------------------------------------------------------------------------------------------------------------------------|---------------------------------------------------------------------------------------------------------------------------------------------|-----------------------------------------------------------------------------------------------------------------------------------------------------------------------------|----------------------------------------------------|--------------------------------------------------------------------------------------------------------------------------------|
| <b>Quality criterion</b> | <b>Urbina et al. [2003]<sup>310</sup></b>                                                                                                                 | <b>Vaidya et al. [2019]<sup>311</sup></b>                                                                                                   | <b>Walker et al. [2019]<sup>313</sup></b>                                                                                                                                   | <b>Wendel et al. [2003]<sup>314</sup></b>          | <b>Werwick et al. [2017]<sup>315</sup></b>                                                                                     |
| <b>Research question</b> | Yes                                                                                                                                                       | Yes                                                                                                                                         | Yes                                                                                                                                                                         | Yes                                                | Yes                                                                                                                            |
| <b>Preregistration</b>   | No statement                                                                                                                                              | No statement                                                                                                                                | No statement                                                                                                                                                                | No statement                                       | No statement                                                                                                                   |
| <b>Study-population</b>  | Yes; randomization: none - random selection from the pool of applicants; representativeness: no assessment possible; selection bias: no socio-demographic | Yes; randomization: none; representativeness: partly; selection bias: no naming of included universities; only inclusion of those who start | Yes; randomization: none; representativeness: given (authors' statement); selection bias: recruitment from a conference of the "Association of Surgeons in Training (ASiT)" | Yes; randomization: none; representativeness: none | Yes; randomization: none; representativeness: none; selection bias: mainly recruitment at special "preparatory seminars" there |

|                                                                         |                                                                                      |                                                                                                                                                                                                                                                                                                                                               |                                                                                                                                                                          |                                             |                                                                                                                                                              |
|-------------------------------------------------------------------------|--------------------------------------------------------------------------------------|-----------------------------------------------------------------------------------------------------------------------------------------------------------------------------------------------------------------------------------------------------------------------------------------------------------------------------------------------|--------------------------------------------------------------------------------------------------------------------------------------------------------------------------|---------------------------------------------|--------------------------------------------------------------------------------------------------------------------------------------------------------------|
|                                                                         | information on the sample, voluntary participation (= primary interest)              | further education directly after FY2 (only 50%)                                                                                                                                                                                                                                                                                               |                                                                                                                                                                          |                                             | voluntary participation (= primary interest)                                                                                                                 |
| <b>Exposition and outcome</b>                                           | Yes                                                                                  | Yes                                                                                                                                                                                                                                                                                                                                           | Yes                                                                                                                                                                      | Yes                                         | Yes                                                                                                                                                          |
| <b>Exposure measure(s), exposure levels</b>                             | Yes; performance bias: possible curricular changes in the period under consideration | Yes; performance bias/confounding: possible differences between included universities                                                                                                                                                                                                                                                         | Yes; performance bias/confounding: possible differences between the individual training levels                                                                           | Yes                                         | Yes                                                                                                                                                          |
| <b>Definition of result, result measurement, number of measurements</b> | Yes; pilot testing and use of valid data (database); multiple survey: annual survey  | Yes; no pilot testing; measurement bias: no uniform implementation                                                                                                                                                                                                                                                                            | Yes; no pilot testing                                                                                                                                                    | Yes; no pilot testing                       | Yes; no pilot testing; multiple survey: before and after the first clinical traineeship, in the 4 <sup>th</sup> year of study and before the start of the PJ |
| <b>Follow-up</b>                                                        | No exact time specifications (choice of specialty included)                          | /                                                                                                                                                                                                                                                                                                                                             | /                                                                                                                                                                        | /                                           | Before first clerkship to practical year (choice of specialty not included)                                                                                  |
| <b>Statistical analysis and limitations</b>                             | Yes; lack of follow-up data; no critical consideration of own study                  | Yes; no temporal correlation of the training curriculum and the FY2 cohort studied; no consideration of weeks completed in "unknown" subject areas (voluntary participation); highly competitive application procedure (choice of subject areas with higher chance of being hired); positives: partly subjective information on the curricula | Yes; certificate of attendance of the conference was handed out after answering the questionnaire; summarized statement for all disciplines, no individual consideration | Yes; no critical consideration of own study | Yes                                                                                                                                                          |

| Quality criterion                                                       | Whitaker et al. [2020] <sup>316</sup>                                                                                                      | Whittaker et al. [2006] <sup>317</sup>                                                                                               | Wiesenfeld et al. [2014] <sup>318</sup>                                                                                              | Williamson et al. [2003] <sup>319</sup>                                                                      | Wimsatt et al. [2016] <sup>320</sup>                                                                                                                                                                                                       |
|-------------------------------------------------------------------------|--------------------------------------------------------------------------------------------------------------------------------------------|--------------------------------------------------------------------------------------------------------------------------------------|--------------------------------------------------------------------------------------------------------------------------------------|--------------------------------------------------------------------------------------------------------------|--------------------------------------------------------------------------------------------------------------------------------------------------------------------------------------------------------------------------------------------|
| <b>Research question</b>                                                | Yes                                                                                                                                        | Yes                                                                                                                                  | Yes                                                                                                                                  | Yes                                                                                                          | Yes                                                                                                                                                                                                                                        |
| <b>Preregistration</b>                                                  | No statement                                                                                                                               | No statement                                                                                                                         | No statement                                                                                                                         | No statement                                                                                                 | No statement                                                                                                                                                                                                                               |
| <b>Study-population</b>                                                 | Yes; randomization: none; representativeness: none (representative for the included university, not with regard to the research objective) | Yes; randomization: none; representativeness: no assessment possible; selection bias: no socio-demographic information on the sample | Yes; randomization: none; representativeness: no assessment possible; selection bias: no socio-demographic information on the sample | Yes; randomization: none; representativeness: no assessment possible; selection bias: missing data on origin | Yes; randomization: none; representativeness: partial (allopathic universities); selection bias: only inclusion of universities that submitted data to the American Academy of Family Physicians, no inclusion of osteopathic universities |
| <b>Exposition and outcome</b>                                           | Yes                                                                                                                                        | Yes                                                                                                                                  | Yes                                                                                                                                  | Yes                                                                                                          | Yes                                                                                                                                                                                                                                        |
| <b>Exposure measure(s), exposure levels</b>                             | Yes; performance bias: not all participating students already had contact with the subject area under investigation                        | Yes; performance bias: no uniform implementation                                                                                     | Yes                                                                                                                                  | Yes                                                                                                          | Yes; performance bias/confounding: possible differences between included universities                                                                                                                                                      |
| <b>Definition of result, result measurement, number of measurements</b> | Yes; pilot testing                                                                                                                         | Yes; no pilot testing and use of valid data (database)                                                                               | Yes; pilot testing                                                                                                                   | Yes; no pilot testing; multiple interviews: before and after the program                                     | Yes; pilot testing                                                                                                                                                                                                                         |

|                                             |                                                                                                                                                                                                                                  |                                                                                                                                                                                                                       |                                                                                                                                                                              |                                                                                                                                                                                                                     |                                                                                                                                         |
|---------------------------------------------|----------------------------------------------------------------------------------------------------------------------------------------------------------------------------------------------------------------------------------|-----------------------------------------------------------------------------------------------------------------------------------------------------------------------------------------------------------------------|------------------------------------------------------------------------------------------------------------------------------------------------------------------------------|---------------------------------------------------------------------------------------------------------------------------------------------------------------------------------------------------------------------|-----------------------------------------------------------------------------------------------------------------------------------------|
| <b>Follow-up</b>                            | /                                                                                                                                                                                                                                | /                                                                                                                                                                                                                     | /                                                                                                                                                                            | Start to end of program (choice of specialty not included)                                                                                                                                                          | /                                                                                                                                       |
| <b>Statistical analysis and limitations</b> | Yes; reduction of the 5-point to a 3-point Likert scale for the analysis; the included university is the only one with a "Level I Trauma Centre", which possibly increases the attractiveness for students interested in surgery | Yes; program changes in the period under consideration; no comparison with assessment before the introduction of this course; bias: highlighting of a clearly positive value; low critical consideration of own study | Yes; response according to social desirability: survey after application, but before final selection of further education applicants; no critical consideration of own study | Yes; reduction of the 5-point to a 3-point Likert scale for the analysis; missing definitions of terms (susceptibility to interpretation); no indication of a response rate; no critical consideration of own study | Yes; response according to social desirability/tilt towards positivity: subjective information (self-reporting) on university curricula |

| <b>Quality criterion</b>                                                | <b>Woodworth et al. [2000]<sup>321</sup></b>                                                                               | <b>Woolley et al. [2019]<sup>322</sup></b>                                                                                                                                                                                                                          | <b>Wright et al. [1997]<sup>323</sup></b>          | <b>Wu and Greenberg [2016]<sup>324</sup></b>                                                                                                                                                                                                                                                                                   | <b>Xu et al. [1999]<sup>325</sup></b>                                                                                                                                           |
|-------------------------------------------------------------------------|----------------------------------------------------------------------------------------------------------------------------|---------------------------------------------------------------------------------------------------------------------------------------------------------------------------------------------------------------------------------------------------------------------|----------------------------------------------------|--------------------------------------------------------------------------------------------------------------------------------------------------------------------------------------------------------------------------------------------------------------------------------------------------------------------------------|---------------------------------------------------------------------------------------------------------------------------------------------------------------------------------|
| <b>Research question</b>                                                | Yes                                                                                                                        | Yes                                                                                                                                                                                                                                                                 | Yes                                                | No clear formulation                                                                                                                                                                                                                                                                                                           | Yes                                                                                                                                                                             |
| <b>Preregistration</b>                                                  | No statement                                                                                                               | No statement                                                                                                                                                                                                                                                        | No statement                                       | No statement                                                                                                                                                                                                                                                                                                                   | No statement                                                                                                                                                                    |
| <b>Study-population</b>                                                 | Yes; randomization: none; representativeness: no assessment possible; selection bias: exclusion of international residents | Yes; randomization: none; representativeness: partly (gender, partly choice of subject area); selection bias: existing interest in the subject area under consideration, no precise information on the gender ratio, no contact data available for 111 participants | Yes; randomization: none; representativeness: none | Yes; randomization: none; representativeness: none; selection bias: voluntary participation (= primary interest), no indication of gender ratio; no uniform recruitment strategy                                                                                                                                               | Yes; randomization: none; representativeness: no assessment possible; selection bias: no socio-demographic information on the sample, only inclusion of allopathic universities |
| <b>Exposition and outcome</b>                                           | Yes                                                                                                                        | Yes                                                                                                                                                                                                                                                                 | Yes                                                | Yes                                                                                                                                                                                                                                                                                                                            | Yes                                                                                                                                                                             |
| <b>Exposure measure(s), exposure levels</b>                             | Yes; performance bias/confounding: possible differences between university education and training programs                 | Yes; performance bias/confounding: possible differences between university education and training programs, possible curricular changes in the period under consideration                                                                                           | Yes                                                | Yes                                                                                                                                                                                                                                                                                                                            | Yes; performance bias/confounding: possible differences between university education and training programs                                                                      |
| <b>Definition of result, result measurement, number of measurements</b> | Yes; no pilot testing                                                                                                      | Yes; no pilot testing                                                                                                                                                                                                                                               | Yes; pilot testing                                 | Yes; no pilot testing; multiple interviews: before and after the course                                                                                                                                                                                                                                                        | Yes; no pilot testing                                                                                                                                                           |
| <b>Follow-up</b>                                                        | /                                                                                                                          | /                                                                                                                                                                                                                                                                   | /                                                  | Start to end of course (choice of specialty not included)                                                                                                                                                                                                                                                                      | /                                                                                                                                                                               |
| <b>Statistical analysis and limitations</b>                             | Yes; no critical consideration of own study                                                                                | Yes; no fully comparable data sets, as different data were collected in some cases; no coding for the qualitative data                                                                                                                                              | Yes                                                | Yes; tendency towards positive evaluation by pre-clinical participants, (possibly first encounter with a clinical specialty, associated euphoria/enthusiasm for the first clinical experience, no competition from other clinical specialties); no statement on whether pre- and post-questionnaire corresponded to each other | Yes; only absolute and relative frequencies are given; recall bias: retrospective questioning of specialist preference before studies                                           |

| Quality criterion                                                       | Xu et al. [1997] <sup>326</sup>                                                                            | Yang et al. [1994] <sup>327</sup>                                                                                                                                                                                                                                                             | Yong et al. [2012] <sup>328</sup>                                                                                                                                                                                                                                                                                                                                             | Yoon et al. [2018] <sup>329</sup>                                                                                                                                                                                                        | Yu et al. [2011] <sup>330</sup>                                                                                                      |
|-------------------------------------------------------------------------|------------------------------------------------------------------------------------------------------------|-----------------------------------------------------------------------------------------------------------------------------------------------------------------------------------------------------------------------------------------------------------------------------------------------|-------------------------------------------------------------------------------------------------------------------------------------------------------------------------------------------------------------------------------------------------------------------------------------------------------------------------------------------------------------------------------|------------------------------------------------------------------------------------------------------------------------------------------------------------------------------------------------------------------------------------------|--------------------------------------------------------------------------------------------------------------------------------------|
| <b>Research question</b>                                                | Yes                                                                                                        | Yes                                                                                                                                                                                                                                                                                           | No clear formulation                                                                                                                                                                                                                                                                                                                                                          | Yes                                                                                                                                                                                                                                      | Yes                                                                                                                                  |
| <b>Preregistration</b>                                                  | No statement                                                                                               | No statement                                                                                                                                                                                                                                                                                  | No statement                                                                                                                                                                                                                                                                                                                                                                  | No statement                                                                                                                                                                                                                             | No statement                                                                                                                         |
| <b>Study-population</b>                                                 | Yes; randomization: none; representativeness: none                                                         | Yes; randomization: none; representativeness: no assessment possible; selection bias: no socio-demographic information on the sample, only inclusion of students who participated in the "Canadian medical graduates participated in a national match (CIMS)"                                 | Yes; randomization: none; representativeness: no assessment possible; selection bias: voluntary participation (= primary interest), no socio-demographic information on the sample                                                                                                                                                                                            | Yes; randomization: none; representativeness: no assessment possible; selection bias: only inclusion of allopathic universities, partly missing socio-demographic data, no information on individual shares of the included universities | Yes; randomization: none; representativeness: no assessment possible; selection bias: no socio-demographic information on the sample |
| <b>Exposition and outcome</b>                                           | Yes                                                                                                        | Yes                                                                                                                                                                                                                                                                                           | Yes                                                                                                                                                                                                                                                                                                                                                                           | Yes                                                                                                                                                                                                                                      | Yes                                                                                                                                  |
| <b>Exposure measure(s), exposure levels</b>                             | Yes; performance bias/confounding: possible differences between university education and training programs | Yes; performance bias/confounding: possible differences between university education and training programs                                                                                                                                                                                    | Yes                                                                                                                                                                                                                                                                                                                                                                           | Yes; performance bias/confounding: possible differences between included universities                                                                                                                                                    | Yes; performance bias/confounding: possible differences between included universities                                                |
| <b>Definition of result, result measurement, number of measurements</b> | Yes; pilot testing                                                                                         | Yes; no pilot testing                                                                                                                                                                                                                                                                         | Yes; no pilot testing; multiple interviews: before and after the course                                                                                                                                                                                                                                                                                                       | Yes; pilot testing; multiple survey: 3 <sup>rd</sup> and 4 <sup>th</sup> year of study                                                                                                                                                   | Yes; no pilot testing, use of test results and logbook entries                                                                       |
| <b>Follow-up</b>                                                        | /                                                                                                          | /                                                                                                                                                                                                                                                                                             | Start to end of course (choice of specialty not included)                                                                                                                                                                                                                                                                                                                     | 5 years (choice of specialty included – matching-data)                                                                                                                                                                                   | /                                                                                                                                    |
| <b>Statistical analysis and limitations</b>                             | Yes; significance level was set at $p < 0.003$ ; no critical consideration of own study                    | Yes; response according to social desirability/tendency to positivity: subjective information (self-reporting) on the university curricula; little critical consideration of own study; no compelling correlation of the curricula queried with the curricula of the PGY1 applicants surveyed | Yes; tendency to positive evaluation by pre-clinical participants, (possibly first encounter with a clinical specialty, associated euphoria/enthusiasm for the first clinical experience, no competition from other clinical specialties); quizzes in the pre- and post-questionnaire corresponded; grading according to participation and not according to performance/skill | Yes; dichotomization of the 4 categories (3 positive statements, 1 negative coupled with slightly positive); assessment of the influencing factors only by a smaller subgroup                                                            | Yes; subjective evaluation of the students; clear differences in results for the included institutes                                 |

| Quality criterion        | Zhang et al. [2020] <sup>331</sup>                                                                               | Ziegler et al. [2020] <sup>332</sup>                                                                             | Zuckerman et al. [2016] <sup>333</sup>                                                                                                                                      | Zuzuárregui and Hohler [2015] <sup>334</sup>                                                                                                                                       |  |
|--------------------------|------------------------------------------------------------------------------------------------------------------|------------------------------------------------------------------------------------------------------------------|-----------------------------------------------------------------------------------------------------------------------------------------------------------------------------|------------------------------------------------------------------------------------------------------------------------------------------------------------------------------------|--|
| <b>Research question</b> | Yes                                                                                                              | Yes                                                                                                              | Yes                                                                                                                                                                         | Yes                                                                                                                                                                                |  |
| <b>Preregistration</b>   | No statement                                                                                                     | No statement                                                                                                     | No statement                                                                                                                                                                | No statement                                                                                                                                                                       |  |
| <b>Study-population</b>  | Yes; randomization: none; representativeness: none; selection bias: voluntary participation (= primary interest) | Yes; randomization: none; representativeness: none; selection bias: voluntary participation (= primary interest) | Yes; randomization: none; representativeness: none; selection bias: voluntary participation (= primary interest), no precise information on the proportions of study years, | Yes; randomization: none; representativeness: no assessment possible; selection bias: voluntary participation (= primary interest), no socio-demographic information of the sample |  |

|                                                                         |                                                                                                 |                                                                                                                                                                                                                                                                                                                                                                  |                                                                                   |                                                                                                                                                                                                                                                                                      |  |
|-------------------------------------------------------------------------|-------------------------------------------------------------------------------------------------|------------------------------------------------------------------------------------------------------------------------------------------------------------------------------------------------------------------------------------------------------------------------------------------------------------------------------------------------------------------|-----------------------------------------------------------------------------------|--------------------------------------------------------------------------------------------------------------------------------------------------------------------------------------------------------------------------------------------------------------------------------------|--|
|                                                                         |                                                                                                 |                                                                                                                                                                                                                                                                                                                                                                  | underrepresentation of female participants                                        |                                                                                                                                                                                                                                                                                      |  |
| <b>Exposition and outcome</b>                                           | Yes                                                                                             | Yes                                                                                                                                                                                                                                                                                                                                                              | Yes                                                                               | Yes                                                                                                                                                                                                                                                                                  |  |
| <b>Exposure measure(s), exposure levels</b>                             | Yes                                                                                             | Yes; performance bias: no uniform implementation                                                                                                                                                                                                                                                                                                                 | Yes                                                                               | Yes; performance bias: development and changes of the program in the course of study                                                                                                                                                                                                 |  |
| <b>Definition of result, result measurement, number of measurements</b> | Yes; pilot testing                                                                              | Yes; pilot testing; measurement bias: no uniform implementation; multiple interviews: before and after the course                                                                                                                                                                                                                                                | Yes; no pilot testing; multiple interviews: before and after the elective subject | No, no measuring instrument stated                                                                                                                                                                                                                                                   |  |
| <b>Follow-up</b>                                                        | /                                                                                               | Start to end of course (choice of specialty not included)                                                                                                                                                                                                                                                                                                        | Start to end of elective (choice of specialty not included)                       | /                                                                                                                                                                                                                                                                                    |  |
| <b>Statistical analysis and limitations</b>                             | Yes; subjective assessment of the increase in knowledge; no critical consideration of own study | Yes; tendency to positive evaluation by pre-clinical participants, (possibly first encounter with a clinical specialty, associated euphoria/enthusiasm for the first clinical experience, no competition from other clinical specialties); attractiveness through crediting as compulsory hours; bias: formation of focus groups with the same level of interest | Yes; no critical consideration of own study                                       | Yes; no critical consideration of the own study; inclusion of data that cannot be attributed to an effect of the program (no temporal correlation of the collected data); no verification of whether the choice of further training in neurology was part of the program under study |  |

**Interventional studies:**

| Quality criterion                                                       | Barron et al. [2012] <sup>25</sup>                                                                                                                                                                                                                                                                                                                                                                                                                                            | Davis et al. [2010] <sup>73</sup>                                                                                                                                                                                 | Day et al. [2016] <sup>74</sup>                                                                                                                                  | Drolet et al. [2014] <sup>84</sup>                                                                                                                                                                                                                                          | Grayson et al. [2001] <sup>113</sup>                                                                                                                                                                                 |
|-------------------------------------------------------------------------|-------------------------------------------------------------------------------------------------------------------------------------------------------------------------------------------------------------------------------------------------------------------------------------------------------------------------------------------------------------------------------------------------------------------------------------------------------------------------------|-------------------------------------------------------------------------------------------------------------------------------------------------------------------------------------------------------------------|------------------------------------------------------------------------------------------------------------------------------------------------------------------|-----------------------------------------------------------------------------------------------------------------------------------------------------------------------------------------------------------------------------------------------------------------------------|----------------------------------------------------------------------------------------------------------------------------------------------------------------------------------------------------------------------|
| <b>Research question</b>                                                | Yes                                                                                                                                                                                                                                                                                                                                                                                                                                                                           | Yes                                                                                                                                                                                                               | Yes                                                                                                                                                              | Yes                                                                                                                                                                                                                                                                         | Yes                                                                                                                                                                                                                  |
| <b>Preregistration</b>                                                  | No statement                                                                                                                                                                                                                                                                                                                                                                                                                                                                  | No statement                                                                                                                                                                                                      | No statement                                                                                                                                                     | No statement                                                                                                                                                                                                                                                                | No statement                                                                                                                                                                                                         |
| <b>Blinding</b>                                                         | No                                                                                                                                                                                                                                                                                                                                                                                                                                                                            | No                                                                                                                                                                                                                | No                                                                                                                                                               | No                                                                                                                                                                                                                                                                          | No                                                                                                                                                                                                                   |
| <b>Study-population(s)</b>                                              | Yes; selection bias: IG - only inclusion of participants of the "Summer Institute for Medical Students (SIMS)" with available e-mail addresses, voluntary participation (= primary interest), KG - only inclusion of physicians who graduated a short time ago; differences in curricular/university requirements due to inclusion of different universities; significant differences between the groups; no uniform treatment; no recruitment from the same total population | Yes; selection bias: IG - voluntary participation (= primary interest); no uniform treatment; no recruitment from the same total population; selection bias: IG - recruitment on the basis of application letters | Yes; no socio-demographic data on both groups                                                                                                                    | Yes; selection bias: IG - voluntary participation (= primary interest), KG - no information on the proportions of the individual study years; equal treatment of both groups; recruitment from the same total population                                                    | Yes; selection bias: primary interest in the subject under consideration in both the IG and one of the two KGs by applying for the course; equal treatment of the groups; recruitment from the same total population |
| <b>Randomization and representativeness</b>                             | Randomization: yes; representativeness: none                                                                                                                                                                                                                                                                                                                                                                                                                                  | Randomization: none; representativeness: no assessment possible                                                                                                                                                   | Randomization: none; representativeness: none                                                                                                                    | Randomization: none - only random selection from the pool of applicants; representativeness: none                                                                                                                                                                           | Randomization: none - only random selection from the pool of applicants; representativeness: limited                                                                                                                 |
| <b>Intervention</b>                                                     | Yes                                                                                                                                                                                                                                                                                                                                                                                                                                                                           | Yes                                                                                                                                                                                                               | Yes                                                                                                                                                              | Yes; performance bias: no uniform implementation in the course of study                                                                                                                                                                                                     | Yes                                                                                                                                                                                                                  |
| <b>Definition of result, result measurement, number of measurements</b> | Yes; no pilot testing; measurement bias: differences in questionnaire size                                                                                                                                                                                                                                                                                                                                                                                                    | Yes; no pilot testing; multiple interviews: before and after the course                                                                                                                                           | Yes; no pilot testing                                                                                                                                            | Yes; pilot testing of the intervention, no pilot testing of the measurement instrument; multiple interviews: before and after the elective subject                                                                                                                          | Yes; no pilot testing                                                                                                                                                                                                |
| <b>Statistical analysis and limitations</b>                             | Yes; confounding: many other confounding factors responsible for differences between the two groups                                                                                                                                                                                                                                                                                                                                                                           | Yes; no critical consideration of own study; strongly differing baseline conditions of both groups; no indication of response rate of KG                                                                          | Yes; only applied to students with primary surgical interest; no indication of response rate of the KG; bias: disappointment of the KG not to have been selected | Yes; no indication of KG response rate; tendency to positive evaluation by preclinical participants, (possibly first encounter with a clinical specialty, associated euphoria/enthusiasm for the first clinical experience, no competition from other clinical specialties) | Yes; formation of 3 groups, 2 groups have a primary interest in the subject area under consideration                                                                                                                 |
| Quality criterion                                                       | Head et al. [2016] <sup>128</sup>                                                                                                                                                                                                                                                                                                                                                                                                                                             | Herold et al. [1993] <sup>131</sup>                                                                                                                                                                               | Hicks et al. [2019] <sup>132</sup>                                                                                                                               | Lou et al. [2013] <sup>184</sup>                                                                                                                                                                                                                                            | Madan et al. [2005] <sup>189</sup>                                                                                                                                                                                   |
| <b>Research question</b>                                                | Yes                                                                                                                                                                                                                                                                                                                                                                                                                                                                           | Yes                                                                                                                                                                                                               | Yes                                                                                                                                                              | Yes                                                                                                                                                                                                                                                                         | Yes                                                                                                                                                                                                                  |

|                                                                         |                                                                                                                                                                                                                                                |                                                                                                 |                                                                                                                                                                                                                                                                                    |                                                                                                                                                                                                                                                                                                                                                                                                                                   |                                                                                                                                                                                                                                                                                                                                                                   |
|-------------------------------------------------------------------------|------------------------------------------------------------------------------------------------------------------------------------------------------------------------------------------------------------------------------------------------|-------------------------------------------------------------------------------------------------|------------------------------------------------------------------------------------------------------------------------------------------------------------------------------------------------------------------------------------------------------------------------------------|-----------------------------------------------------------------------------------------------------------------------------------------------------------------------------------------------------------------------------------------------------------------------------------------------------------------------------------------------------------------------------------------------------------------------------------|-------------------------------------------------------------------------------------------------------------------------------------------------------------------------------------------------------------------------------------------------------------------------------------------------------------------------------------------------------------------|
| <b>Preregistration</b>                                                  | No statement                                                                                                                                                                                                                                   | No statement                                                                                    | No statement                                                                                                                                                                                                                                                                       | No statement                                                                                                                                                                                                                                                                                                                                                                                                                      | No statement                                                                                                                                                                                                                                                                                                                                                      |
| <b>Blinding</b>                                                         | No                                                                                                                                                                                                                                             | No                                                                                              | No                                                                                                                                                                                                                                                                                 | No                                                                                                                                                                                                                                                                                                                                                                                                                                | No                                                                                                                                                                                                                                                                                                                                                                |
| <b>Study-population(s)</b>                                              | Yes; selection bias: differences in gender distribution, IG - voluntary participation (= primary interest); equal treatment of both groups; recruitment from the same total population                                                         | Yes; equal treatment of the groups; recruitment from the same total population                  | Yes; equal treatment of the groups; recruitment from the same total population                                                                                                                                                                                                     | Yes; equal treatment of the groups; recruitment from the same total population                                                                                                                                                                                                                                                                                                                                                    | Yes; equal treatment of the groups; recruitment from the same total population                                                                                                                                                                                                                                                                                    |
| <b>Randomization and representativeness</b>                             | Randomization: none - only for the KG; representativeness: none                                                                                                                                                                                | Randomization: none - only random recruitment from the applicant pool; representativeness: none | Randomization: none; representativeness: none                                                                                                                                                                                                                                      | Randomization: yes; representativeness: none                                                                                                                                                                                                                                                                                                                                                                                      | Randomization: not specified; representativeness: none                                                                                                                                                                                                                                                                                                            |
| <b>Intervention</b>                                                     | Yes; performance bias: no uniform implementation                                                                                                                                                                                               | Yes                                                                                             | Yes                                                                                                                                                                                                                                                                                | Yes                                                                                                                                                                                                                                                                                                                                                                                                                               | Yes                                                                                                                                                                                                                                                                                                                                                               |
| <b>Definition of result, result measurement, number of measurements</b> | Yes; no pilot testing; measurement bias: no uniform implementation (between groups)                                                                                                                                                            | Yes; no pilot testing and use of valid data (database)                                          | Yes; no pilot testing; measurement bias: no uniform implementation (between groups); multiple interviews: before and after the program                                                                                                                                             | Yes; no pilot testing; multiple interviews: pre-intervention, post-simulation but pre-training, post-simulation and post-training                                                                                                                                                                                                                                                                                                 | Yes; no pilot testing; multiple interviews: before and after the course                                                                                                                                                                                                                                                                                           |
| <b>Statistical analysis and limitations</b>                             | Yes; bias: inclusion of students who were not selected for the IG in the KG; confounding: KG answered the questionnaire at home; bias (more positive results): pre- and post-questionnaire corresponded; no indication of the KG response rate | Low, only indication of absolute and relative frequencies                                       | Yes; bias: compensation for participation: credit for participation hours and inclusion in a lottery pool; confounding: KG answered the questionnaire at home, influence of other electives for KG; bias (more positive results): pre- and post-questionnaire were almost the same | Yes; tendency to positive evaluation by preclinical participants, (possibly first encounter with a clinical specialty, associated euphoria/enthusiasm for the first clinical experience, no competition from other clinical specialties); 2nd and 3rd questionnaires corresponded; confounding/bias: possibly more negative evaluation for discouragement and demoralization if there were no practice opportunities for handling | Yes; tendency to positive evaluation by preclinical participants, (possibly first encounter with a clinical specialty, associated euphoria/enthusiasm for the first clinical experience, no competition from other clinical specialties); bias: no pairing of pre- and post-data (limited statement on preference change); no critical consideration of own study |

|                            |                                                                                                                                                              |                                                                                    |                                                                                                                                                 |  |  |
|----------------------------|--------------------------------------------------------------------------------------------------------------------------------------------------------------|------------------------------------------------------------------------------------|-------------------------------------------------------------------------------------------------------------------------------------------------|--|--|
| <b>Quality criterion</b>   | <b>Martin et al. [2007]<sup>196</sup></b>                                                                                                                    | <b>Pokrzywko et al. [2019]<sup>242</sup></b>                                       | <b>Sammann et al. [2007]<sup>266</sup></b>                                                                                                      |  |  |
| <b>Research question</b>   | Yes                                                                                                                                                          | Yes                                                                                | Yes                                                                                                                                             |  |  |
| <b>Preregistration</b>     | No statement                                                                                                                                                 | No statement                                                                       | No statement                                                                                                                                    |  |  |
| <b>Blinding</b>            | No                                                                                                                                                           | No                                                                                 | No                                                                                                                                              |  |  |
| <b>Study-population(s)</b> | Yes; selection bias: IG - participation only from students who were in the vicinity; equal treatment of the two groups; recruitment from the same population | Yes; equal treatment of the two groups; recruitment from the same total population | Yes; selection bias: IG - voluntary participation (= primary interest); significant differences between groups; equal treatment of both groups; |  |  |

|                                                                         |                                                                                                                                                                                                                |                                                                                                      |                                                                                                                                                                                                                                                                                                                                              |  |  |
|-------------------------------------------------------------------------|----------------------------------------------------------------------------------------------------------------------------------------------------------------------------------------------------------------|------------------------------------------------------------------------------------------------------|----------------------------------------------------------------------------------------------------------------------------------------------------------------------------------------------------------------------------------------------------------------------------------------------------------------------------------------------|--|--|
|                                                                         |                                                                                                                                                                                                                |                                                                                                      | recruitment from the same total population                                                                                                                                                                                                                                                                                                   |  |  |
| <b>Randomization and representativeness</b>                             | Randomization: none; representativeness: none                                                                                                                                                                  | Randomization: none-via the alphabetical order; representativeness: none                             | Randomization: none; representativeness: none                                                                                                                                                                                                                                                                                                |  |  |
| <b>Intervention</b>                                                     | Yes                                                                                                                                                                                                            | Yes; performance bias: no uniform implementation, possible differences between included universities | Yes; performance bias: no uniform implementation                                                                                                                                                                                                                                                                                             |  |  |
| <b>Definition of result, result measurement, number of measurements</b> | Yes; no pilot testing; multiple interviews: before and after clerkship                                                                                                                                         | Yes; no pilot testing; multiple interviews: Start and end of rotation                                | Yes; no pilot testing; multiple interviews: before and after the course                                                                                                                                                                                                                                                                      |  |  |
| <b>Statistical analysis and limitations</b>                             | Yes; the control group was always the proportion of the group that did not receive the respective intervention; no information on the respective proportions of intervention and non-intervention participants | Yes; bias: remuneration of participation                                                             | Yes; tendency to positive evaluation by pre-clinical participants, (possibly first encounter with a clinical specialty, associated euphoria/enthusiasm for the first clinical experience, no competition from other clinical specialties); bias: subjective indication of increase in knowledge and skills of specific procedures/techniques |  |  |

**Note:** \*: All reference numbers refer to the numbering in [Additional file 2](#).

## **Additional file 5:** Elaborated questions of quality assessments

### 1) Study design qualitative observational studies

Clear formulation of the research question and the research objective?

Was there pre-registration through a study protocol?

Clear description of methods (setting and data collection) and justification of the qualitative approach?

Sufficient description of the recruitment strategy, was randomization carried out, is representativeness given?

Is there a sufficient length of follow-up?

Sufficient description of the data analysis/analysis process?

Has a clear statement been made about the results and the value/usefulness/meaningfulness of the research? Limitations?

### 2) Study design quantitative or quantitative + qualitative observational studies:

Clear formulation of the research question and the research objective?

Was there pre-registration through a study protocol?

Description of the study population, participant recruitment and sample size, was randomization conducted, is representativeness given?

Sufficient description of the relationship between exposure and outcome of interest?

Sufficient description of exposure measure(s), exposure levels (if any) and consistent implementation across participants?

Have outcomes, the conduct of outcome measurement and the number of measurements been described/defined and implemented consistently across all participants?

Is there sufficient follow-up length?

Has an adequate statistical analysis been carried out and, if necessary, confounding factors measured and eliminated? Limitations?

### 3) Study design Intervention studies:

Clear formulation of the research question and the research objective?

Was there pre-registration through a study protocol?

Was there blinding?

Adequate description of the study population, participant recruitment and sample size? Was the treatment of both groups (apart from the intervention) the same, recruited from the same total population?

Are randomization and representativeness given?

Adequate description of the intervention?

Were outcomes, the implementation of outcome measurement and the number of measurements described/defined and these implemented consistently?

Has adequate statistical analysis been carried out and, if necessary, confounding factors measured and removed? Limitations?
